# Supplementary material for: Transcriptional fates of human-specific segmental duplications in brain
Source: PubMed Central journal article supplement — Genome Res. 2018 Oct;28(10):1566–76. doi: 10.1101/gr.237610.118 (PMC6169893; doi:10.1101/gr.237610.118), 2018-10
Supplement: supp_gr.237610.118_Supplemental_Material.pdf [file supp_gr.237610.118_Supplemental_Material.pdf]

Supplemental Materials for:

# Transcriptional fates of human-specific segmental duplications in brain

Max L. Dougherty, Jason G. Underwood, Bradley J. Nelson, Elizabeth Tseng, Katherine M. Munson, Osnat Penn, Tomasz J. Nowakowski, Alex A. Pollen, and Evan E. Eichler

## Table of Contents

**Supplemental Methods** .....pp. 2-4

## Supplemental Figures

Figure S1.....p. 5  
Figure S2.....p. 6  
Figure S3.....p. 7  
Figure S4.....p. 8  
Figure S5.....p. 9  
Figure S6.....p. 10

Supplemental Note.....p. 11

## Description of other Supplemental Files

Supplemental\_Tables.xlsx

Table S1. Probe design, including targeted gene families and number of probes

Table S2a. HSD1 probe design sequences

Table S2b. HSD2 probe design sequences

Table S3. Barcoded end sequences

Table S4. SMRT cells sequenced

Table S5. Summary sequence statistics

Table S6. Analyzed gene set

Table S7. Fusions vs. truncations in 3' truncated genes

Table S8. Quantification of isoform abundance for Tigger-derived exon

Novel Isoforms FASTA file: Supplemental\_File\_S1.fasta

Novel Isoforms GFF file: Supplemental\_File\_S2.gff

Custom Iso-Seq processing script: Supplemental\_File\_S3.py

See also: [https://github.com/EichlerLab/isoseq\\_pipeline](https://github.com/EichlerLab/isoseq_pipeline)

## Supplemental Methods

**cDNA synthesis oligonucleotides:** We synthesized specialized poly(dT) oligonucleotides to prime first-strand cDNA synthesis (Integrated DNA Technologies [IDT]) with the following configuration:

5'-AAGCAGTGGTATCAACGCAGAGT(BC16bp)TTTTTTTTTTTTTTTTTTTTTTTTTTTTTTTTVN-3',

where the sequence BC16bp encodes one of 96 of the 16 bp barcodes, V=(A,G,C), and N=(any base).

We synthesized oligonucleotides for second-strand synthesis with the following configuration:

5'-AAGCAGTGGTATCAACGCAGAGT(BC16bp)ATACGATTTAGGTGACACTATAGG-3'

where the sequence BC16bp encodes one of 96 of the 16 bp barcodes. The template switch

oligonucleotide, a chimeric RNA-DNA sequence, was synthesized:

AAGCAGTGGTATCAACGCAGAGTACATrGrGrG

For cDNA amplification, the 5' flanking sequence in the first- and second-strand oligonucleotides was utilized for PCR: /5Phos/AAGCAGTGGTATCAACGCAGAGT.

**Mapping of putative full-length cDNA:** To take advantage of the higher read qualities available through the Iso-Seq “clustering” pipeline (in which multiple reads are used to generate a consensus isoform), but to avoid the potential for confounding by reads from separate paralogs being merged in the same cluster, we performed this step in partitioned genomic regions (as described in [Kronenberg et al. 2018]). Regions are split to ensure that no pair of SD “mates” is found in any one region. Only confidently mapped reads (MAPQ > 40) are input into the clustering step, and clustering is performed separately in each region, generating consensus isoforms without contamination from other paralogs (Figure S6).

We further performed the “collapse” step whereby consensus isoforms are mapped and the mappings are used to remove redundant isoforms. In practice, we found that this generated a greater number of “nonredundant isoforms” for most paralogs than would be expected and that many appeared to be fragments of isoforms, especially for genes with longer transcripts for which we were less likely to have captured full-length isoforms on single reads. Therefore, it was necessary to merge more than one

fragment isoform from the final output of this modified Iso-Seq pipeline to generate a full-length gene model.

Finally, newly determined isoforms were assessed for support by other data sources. This includes reads of 5' ends of RNA molecules generated with cap analysis of gene expression (CAGE) data from the FANTOM5 consortium (Lizio et al. 2015), 3' ends of polyadenylated RNA molecules (poly(A)-seq) from Leslie, Mayr, and colleagues (Lianoglou et al. 2013) remapped to GRCh38, and various PacBio RNA-seq datasets, including: H1 human embryonic stem cell (GEO accession GSM1254204), Iso-Seq whole transcriptome from human brain with Alzheimer's disease ([https://downloads.paccloud.com/public/dataset/Alzheimer\\_IsoSeq\\_2016/](https://downloads.paccloud.com/public/dataset/Alzheimer_IsoSeq_2016/) accessed Dec 2016), whole transcriptome from human brain, liver, and heart ([http://datasets.pacb.com.s3.amazonaws.com/2014/Iso-seq\\_Human\\_Tissues/list.html](http://datasets.pacb.com.s3.amazonaws.com/2014/Iso-seq_Human_Tissues/list.html) accessed Dec 2016), and Iso-Seq whole transcriptome generated from MCF-7 human breast cancer cell line (<https://github.com/PacificBiosciences/DevNet/wiki/IsoSeq-Human-MCF7-Transcriptome> accessed Dec 2016).

**Secondary analysis of long-read RNA-seq data:** *Proportion of fusion (duplication-spanning) versus truncation reads:* For each duplicate gene investigated, a constitutive exon close to the breakpoint was chosen as an anchor point, and mapped pFL reads (MAPQ > 40) including that exon were selected in order to mitigate non-full-length reads from inflating the “truncated” count. Counts of reads that contain spliced exons beyond the duplication breakpoint were calculated using BEDTools (Quinlan and Hall 2010). Based on this proportion, a duplicate gene was designated as “primarily truncation” (<0.2), “primarily fusion” (>0.8), or “both” (0.2–0.8).

*Splicing disorder:* The number of supporting pFL reads for *FCGR1A* and *FCGR1B* isoforms output by the “collapse” step of the modified Iso-Seq pipeline (minimum 2 pFL reads) were used as an approximation of relative isoform abundance. Shannon's entropy was calculated using the isoform

abundances for each paralog with the entropy package (v1.2.1) (Hausser and Strimmer 2009, *J. Mach. Learn. Res.* 10, 1469-1484).

**Probes for *in situ* hybridization:** Probes used for RNA *in situ* hybridization were synthesized within a pCI-NEO vector flanked by XhoI-NotI cloning sites to the antisense strand of target mRNAs (Promega): probe ARHGAP11AB-e1e2e3e4 (“AB”) was designed to bases 146 to 805 of NM\_001039841.1; probe ARHGAP11A-e12-utr (“A”) to bases 3286 to 4005 of NM\_014783.4; probe ARHGAP11B-07utr (“B”) to bases 2983 to 3688 of NR\_038253.1. Note that probe “B” is not homologous to any transcribed part of the ancestral *OTUD7A* gene, and thus is not predicted to detect *OTUD7A* expression.

## Supplemental Figures

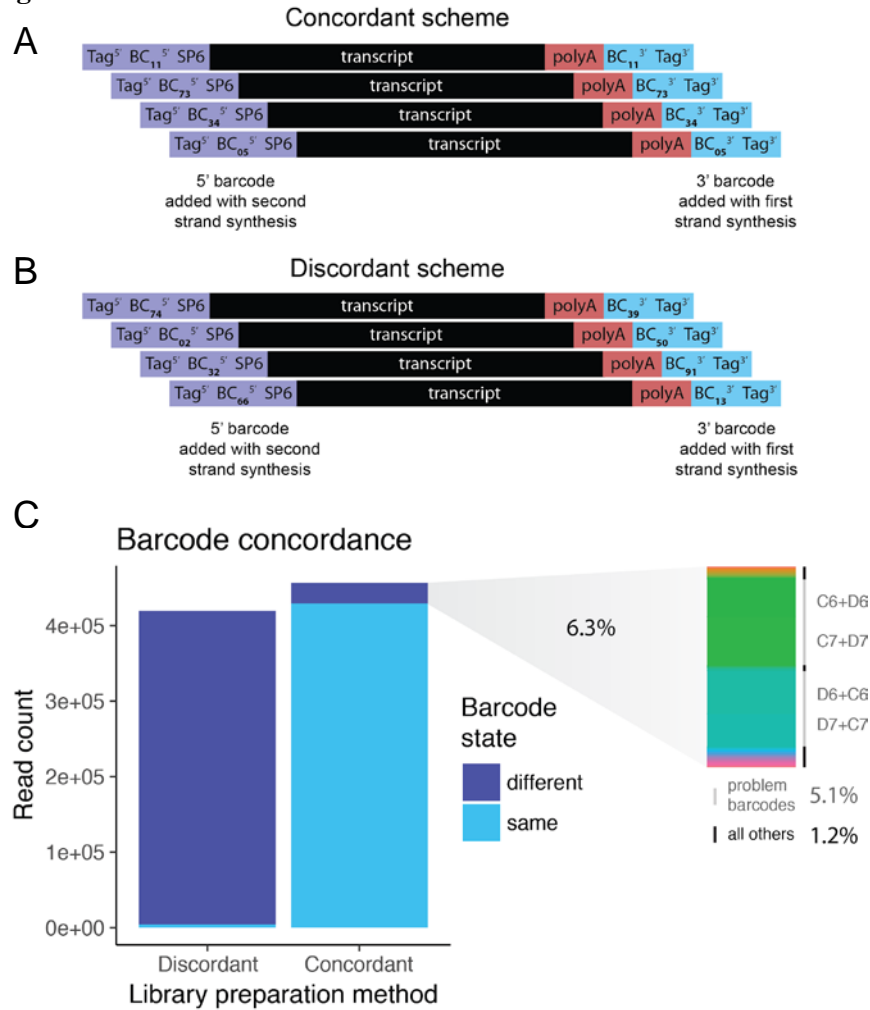

**Figure S1. Barcoding strategy.** **A)** In the concordant barcode scheme, 1 of 96 identical barcodes is appended to the 3' and 5' ends of transcript sequences during first strand and second strand synthesis, respectively. This allows for detection of false chimeric sequences generated during amplification. **B)** In the discordant barcode scheme, 1 of 96 barcodes is appended at random to 3' and 5' ends of transcript sequences. In this method, the combination (96x96) can be used as a pseudo-unique molecular identifier to measure the frequency of PCR duplicates. **C)** The concordance of reads from libraries prepared under both schemes is shown, measured as number of putative full-length (pFL) reads with barcodes that are the same or different. Among discordant-scheme libraries, we obtain 1.0% reads with matching barcodes, consistent with a 1 in 96 chance. Among concordant-scheme libraries, we obtain 93.7% reads with matching barcodes, indicating that 6.3% are not as expected. When we examine which barcode pairs comprise these unexpectedly discordant reads, we observe that the majority (80%) are derived from two particular pairings of barcodes (in both orientations), here labelled by their position in a 96-well plate. Contamination specifically between the barcodes of wells C6 and D6, and wells C7 and D7, are mostly responsible. Because the pattern holds true for all concordant-scheme libraries over multiple separate library preparations, we believe this is most likely due to a manufacturing error that led to contamination. Eliminating those “problem pairings”, we observe a rate of 1.2% discordancy, indicating that chimeric formation during PCR is rare.

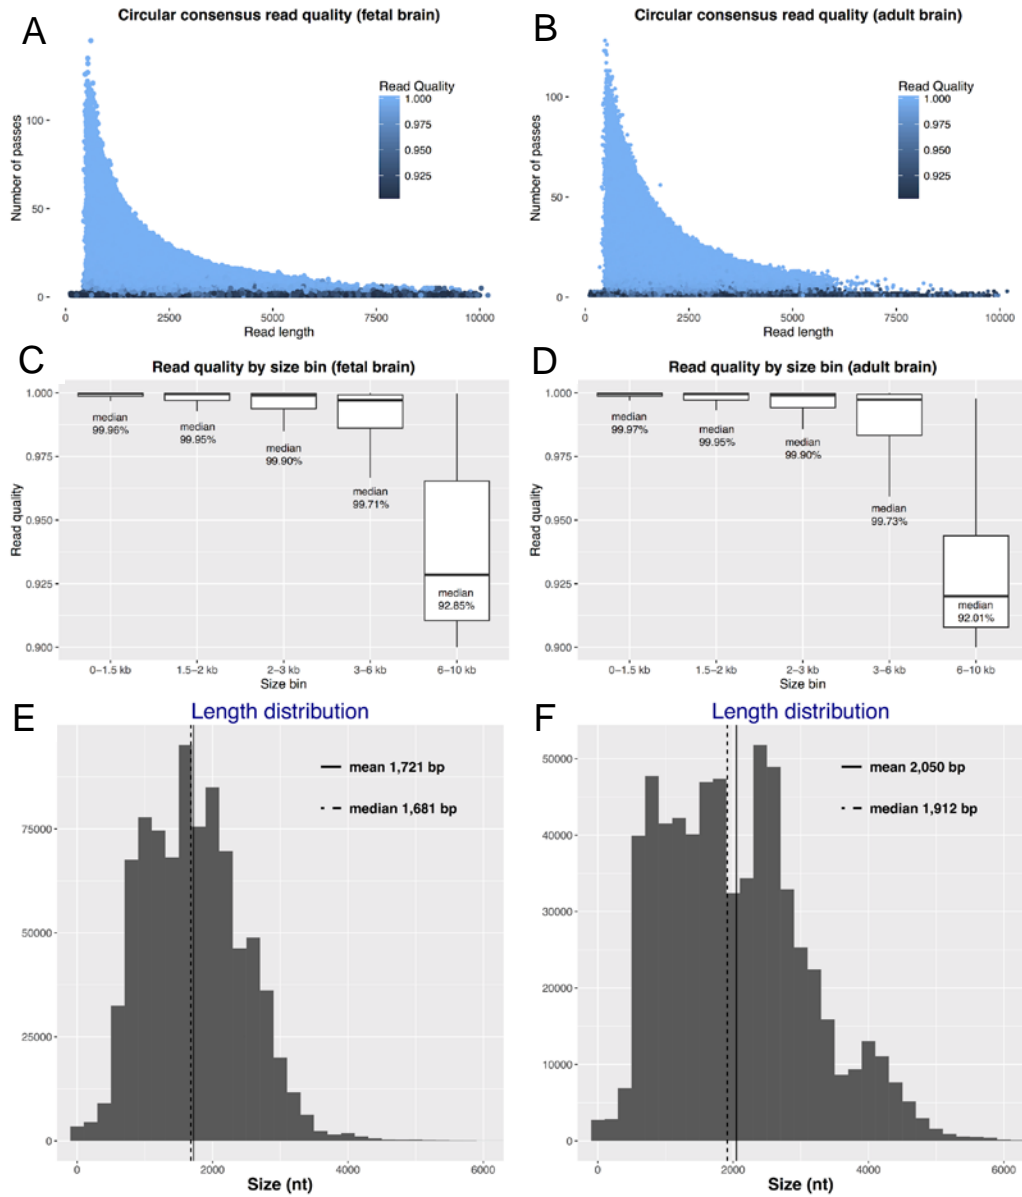

**Figure S2. CCS read quality is highly dependent on read length.** In both fetal brain (A) and adult brain (B), there is an inverse relationship between read length and the number of passes by the sequencing polymerase. This determines the number of subreads from which a given read is generated, which directly affects read quality. Each point represents a CCS read. Reads with a high number of passes (i.e., subreads) have very high average read quality. When reads are binned by size (C, D), we see that reads smaller than 3 kbp have on average >99.9% read quality, but for reads over 6 kbp that falls to ~92%. The ICE algorithm clusters these low-quality reads and uses the resulting multiple sequence alignment to arrive at cluster-based isoforms with >99% read quality. Data is shown for HSD1-enriched cDNA, for which we generated the most sequencing reads. Quality values are taken from the “rq” field of post-CCS bam files. Size distributions of pFL reads designated for (E) adult brain and (F) fetal brain.

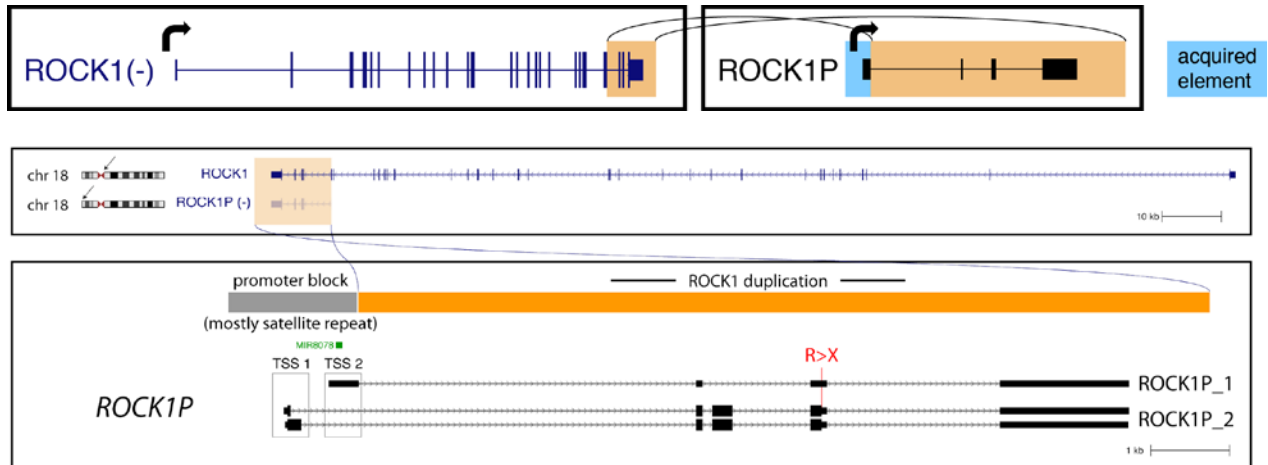

**Figure S3. Promoter exaptation in the 5' truncated duplicate gene *ROCK1P*.** The final four exons and preceding splice donor of the large gene *ROCK1* underwent an inverted intrachromosomal duplication on Chromosome 18, generating *ROCK1P*. “Rescue” of the 5' truncated gene is facilitated by promoter borrowing from the adjacent duplication block, which creates two nearby transcription start sites (TSS 1 and TSS 2) that overlap a microRNA identified in testis. *ROCK1P* has highest expression in the testis, in contrast to the ancestral widely expressed *ROCK1*, likely indicating a role for this acquired promoter in *ROCK1P*’s expression pattern. A stop gain on the penultimate exon of *ROCK1P* makes the open-reading frame (ORF) even shorter than by duplication alone, possibly indicating neutrality of the coding sequence.

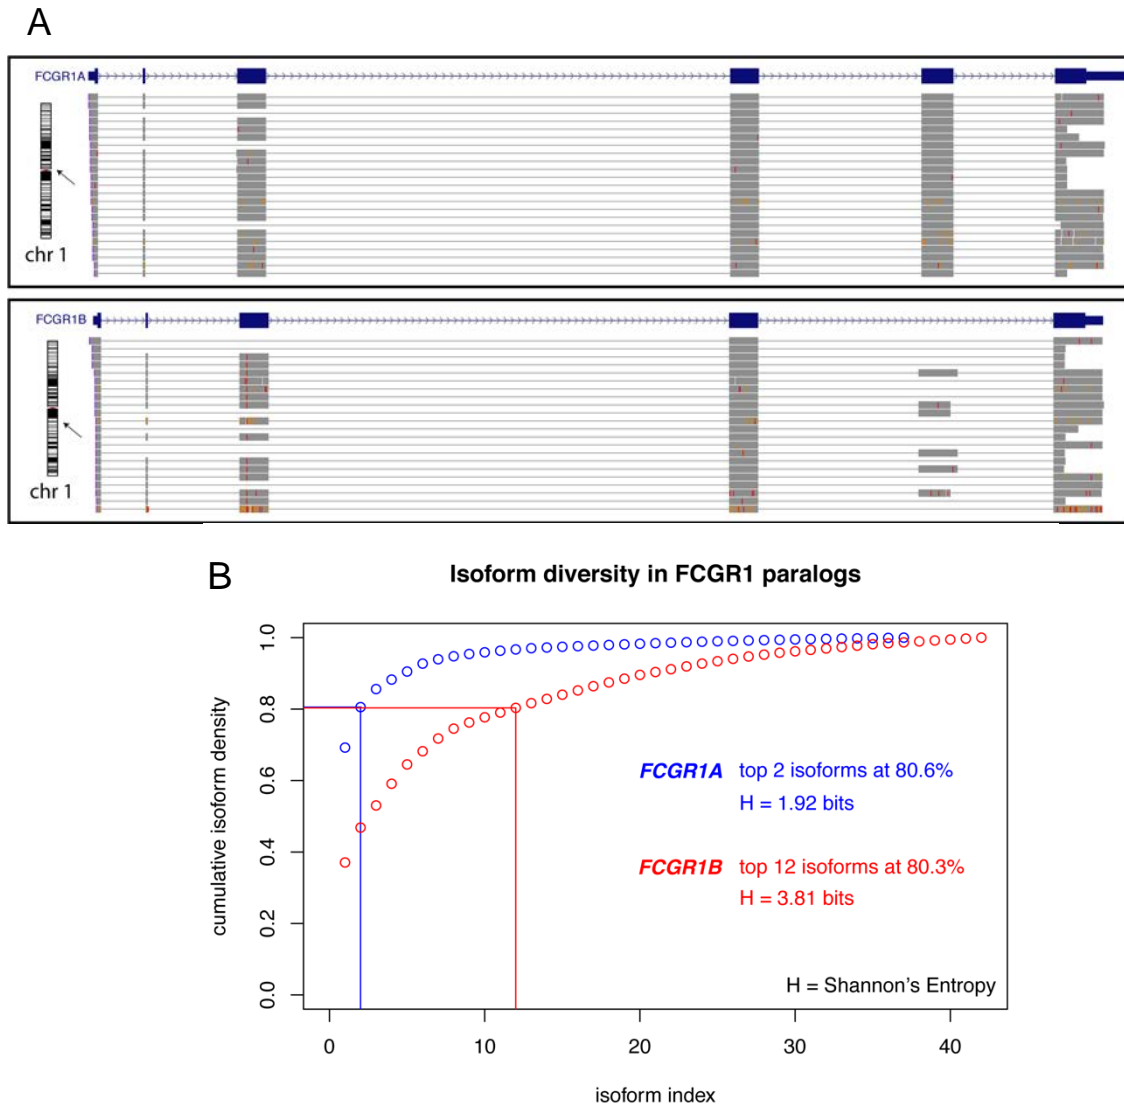

**Figure S4. Relaxed selection on splicing results in increased disorder of isoforms. A)** A random subset of ~25 reads each for *FCGR1A* and *FCGR1B* is shown. A visually striking difference in the orderliness of isoforms is apparent, with *FCGR1B* appearing substantially more disorderly. When compared to the ancestral paralog *FCGR1A*, *FCGR1B* displays a greater diversity of splice isoforms, particularly due to variable choice of splice donor and acceptor sites at exon 5, as well as exclusion of exon 5. In *FCGR1A*, this lack of incorporation of this exon is not observed (<0.4%). **B)** Cumulative distributions of isoform abundances in *FCGR1A* (blue) and *FCGR1B* (red) are plotted. The two most abundant *FCGR1A* isoforms comprise 80.6% of the total *FCGR1A* reads, while for *FCGR1B*, it is not until the 12<sup>th</sup> most abundant isoform that 80.3% of total reads is reached, indicating a significant “flattening out” of relative isoform abundances ( $p = 1.3 \times 10^{-7}$ ), also manifesting as an increase in the entropy of this distribution.

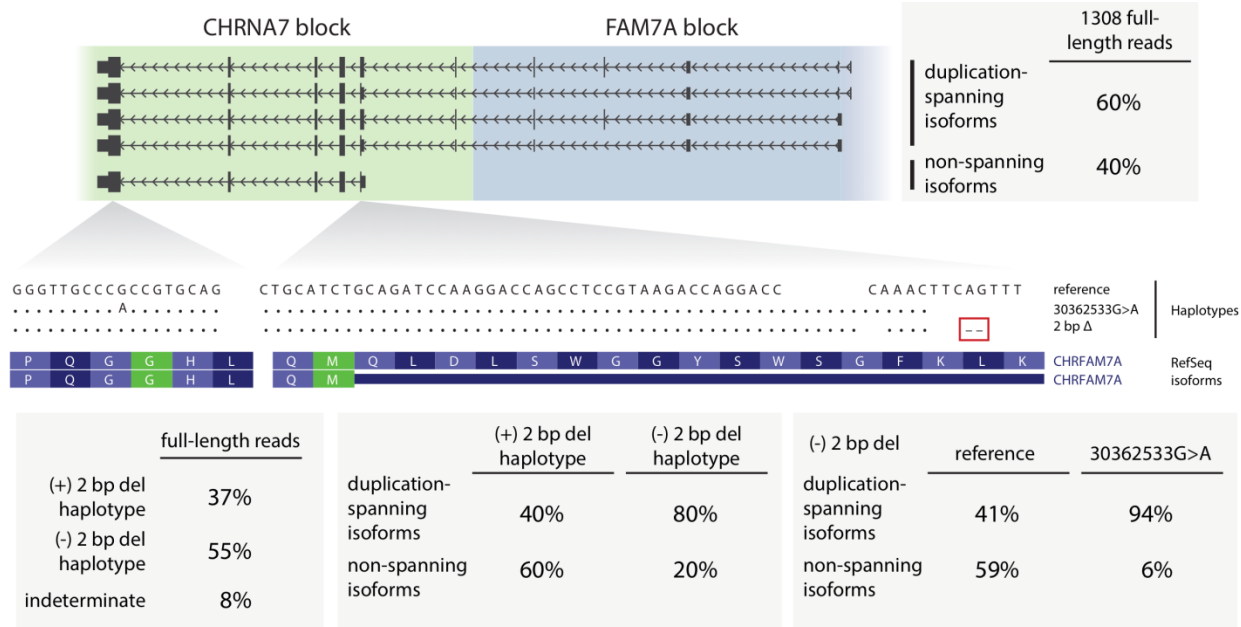

**Figure S5. Identification of 5' truncated *CHRFAM7A* isoform.** SMRT sequencing of probe-enriched cDNA generated from pooled fetal and adult brain yielded 1,308 pFL *CHRFAM7A* reads (MAPQ > 40). Of these reads, 60% spanned the *CHRNA7* duplication boundary and included upstream exons from the *FAM7A* block, while 40% of reads were initiated from a transcription start site (TSS) internal to the *CHRNA7* block, in the vicinity of the splice acceptor of the exon paralogous to exon 6 of canonical *CHRNA7* (referred to as *CHRFAM7A* exon 6). While we do not have access to the genotypes of the individuals from whom these reads were generated, three alleles can be discerned from variants within the transcribed sequence: the reference allele, the 30363533G>A allele, and the 2 bp Δ allele. The 2 bp Δ allele causes a frameshift in the ORF found in some of the duplication-spanning isoforms but is outside the ORF that begins in *CHRFAM7A* exon 6, which is contained in the other duplication spanning isoforms as well as the non-spanning isoform. The 2 bp Δ transcripts have a smaller proportion of duplication spanning isoforms when compared to transcripts without the deletion. Reads with the 30363533G>A allele are almost exclusively duplication-spanning, while the other two alleles share a similar ratio. Naively, the non-spanning isoform should have a greater probability of having the relevant, translated ORF, given it is unaffected by the 2 bp Δ and has a 5' UTR that is shorter and composed of fewer exons.



## Supplemental Note

While the most notable or novel features of isoforms detected from targeted HSD gene families are already discussed (main text/supplement), we also present a short summary by gene family with reference to specific and novel isoforms that were discovered during this analysis (named in isoform supplemental files). See also Figure 3 and Table S6 for an overview of features of isoforms identified by gene family.

**NOTCH2NL:** We characterize a number of isoforms for the truncated *NOTCH2NL* duplicated copies, which differ mainly by two alternative splicing events: 1) use of an alternate splice acceptor in exon 2, which shortens the exon by 8 bp, and 2) retention of the final intron. These include *NOTCH2NL\_1*, *NOTCH2NL\_2*, *NOTCH2NL\_3*, *NOTCH2NL\_4*, *NOTCH2NLB\_1*, *NOTCH2NLC\_1*, *NOTCH2NLD\_1*, and *NOTCH2NLD\_2*. We also note frequent fusion transcription between *NOTCH2NL* paralogs and downstream *NBPF* genes.

**SRGAP2:** In addition to previously described *SRGAP2* isoforms, we identify isoform *SRGAP2B\_2*, which contains the ORF-disrupting 61 bp exon (see Figure 6).

**CD8B:** We identify two isoforms for *CD8B2*, including the major isoform *CD8B2\_1*, which is homologous to the major isoform of *CD8B*, and the minor isoform *CD8B2\_2* whose final exon sits outside the duplication boundary, thus predicted to produce a different C-terminus (see also Figure 5).

**ARHGAP11:** We report a minor isoform of the ancestral gene *ARHGAP11A* (*ARHGAP11A\_7*) that is an in-frame fusion with the downstream gene *SCG5*. We include three isoforms of *ARHGAP11B*, which demonstrate varying degrees of transcript fusion: *ARHGAP11B\_3*, *ARHGAP11B\_5*, and *ARHGAP11B\_6* (see also Figure 4).

**FRMPD and PTPN20CP:** We report a truncated isoform of *FRMPD2B* (*FRMPD2B\_1*) and two fusion isoforms of *PTPN20CP* (*PTPN20CP\_1*, *PTPN20CP\_2*).

**CHRNA7:** We include the truncated isoform of *CHRFAM7A* whose TSS is contained within the partial duplication of *CHRNA7* (*CHRFAM7A\_1*, see also Figure S5).

**ROCK1P:** We report two isoforms of *ROCK1P1* (*ROCK1P1\_1*, *ROCK1P1\_2*), which derive their TSS from adjacent duplicate sequence (see also Figure S3).

**GTF2I:** We report two isoforms of the duplicate *GTF2IP1*, which appear to have a TSS found within the duplication and differ by retention of the final intron (*GTF2IP1\_1*, *GTF2IP1\_2*). Finally, for *GTF2I*, *GTF2IRD2*, and *GTF2IRD2B*, we include the isoforms detected that contained the alternative, Tigger7-derived, first exon (*GTF2I\_1*, *GTF2IRD2\_1*, *GTF2IRD2B\_1*) as well as the noncoding fusion isoform between *GTF2IRD2* and *STAG3L2* (*GTF2IRD2\_2*, see also Figure 7).

chr15 (q13.2) 15p13 15p12 15p11.2 15q11.2 15q11.1 15q11 15q11.1 15q11.2 15q11.3 15q11.4 15q11.5 15q11.6 15q11.7 15q11.8 15q11.9 15q12 15q13 15q14 15q15 15q16 15q17 15q18 15q19 15q20 15q21 15q22 15q23 15q24 15q25 15q26 15q27 15q28 15q29 15q30 15q31 15q32 15q33 15q34 15q35 15q36 15q37 15q38 15q39 15q40 15q41 15q42 15q43 15q44 15q45 15q46 15q47 15q48 15q49 15q50 15q51 15q52 15q53 15q54 15q55 15q56 15q57 15q58 15q59 15q60 15q61 15q62 15q63 15q64 15q65 15q66 15q67 15q68 15q69 15q70 15q71 15q72 15q73 15q74 15q75 15q76 15q77 15q78 15q79 15q80 15q81 15q82 15q83 15q84 15q85 15q86 15q87 15q88 15q89 15q90 15q91 15q92 15q93 15q94 15q95 15q96 15q97 15q98 15q99 15q100 15q101 15q102 15q103 15q104 15q105 15q106 15q107 15q108 15q109 15q110 15q111 15q112 15q113 15q114 15q115 15q116 15q117 15q118 15q119 15q120 15q121 15q122 15q123 15q124 15q125 15q126 15q127 15q128 15q129 15q130 15q131 15q132 15q133 15q134 15q135 15q136 15q137 15q138 15q139 15q140 15q141 15q142 15q143 15q144 15q145 15q146 15q147 15q148 15q149 15q150 15q151 15q152 15q153 15q154 15q155 15q156 15q157 15q158 15q159 15q160 15q161 15q162 15q163 15q164 15q165 15q166 15q167 15q168 15q169 15q170 15q171 15q172 15q173 15q174 15q175 15q176 15q177 15q178 15q179 15q180 15q181 15q182 15q183 15q184 15q185 15q186 15q187 15q188 15q189 15q190 15q191 15q192 15q193 15q194 15q195 15q196 15q197 15q198 15q199 15q200 15q201 15q202 15q203 15q204 15q205 15q206 15q207 15q208 15q209 15q210 15q211 15q212 15q213 15q214 15q215 15q216 15q217 15q218 15q219 15q220 15q221 15q222 15q223 15q224 15q225 15q226 15q227 15q228 15q229 15q230 15q231 15q232 15q233 15q234 15q235 15q236 15q237 15q238 15q239 15q240 15q241 15q242 15q243 15q244 15q245 15q246 15q247 15q248 15q249 15q250 15q251 15q252 15q253 15q254 15q255 15q256 15q257 15q258 15q259 15q260 15q261 15q262 15q263 15q264 15q265 15q266 15q267 15q268 15q269 15q270 15q271 15q272 15q273 15q274 15q275 15q276 15q277 15q278 15q279 15q280 15q281 15q282 15q283 15q284 15q285 15q286 15q287 15q288 15q289 15q290 15q291 15q292 15q293 15q294 15q295 15q296 15q297 15q298 15q299 15q300 15q301 15q302 15q303 15q304 15q305 15q306 15q307 15q308 15q309 15q310 15q311 15q312 15q313 15q314 15q315 15q316 15q317 15q318 15q319 15q320 15q321 15q322 15q323 15q324 15q325 15q326 15q327 15q328 15q329 15q330 15q331 15q332 15q333 15q334 15q335 15q336 15q337 15q338 15q339 15q340 15q341 15q342 15q343 15q344 15q345 15q346 15q347 15q348 15q349 15q350 15q351 15q352 15q353 15q354 15q355 15q356 15q357 15q358 15q359 15q360 15q361 15q362 15q363 15q364 15q365 15q366 15q367 15q368 15q369 15q370 15q371 15q372 15q373 15q374 15q375 15q376 15q377 15q378 15q379 15q380 15q381 15q382 15q383 15q384 15q385 15q386 15q387 15q388 15q389 15q390 15q391 15q392 15q393 15q394 15q395 15q396 15q397 15q398 15q399 15q400 15q401 15q402 15q403 15q404 15q405 15q406 15q407 15q408 15q409 15q410 15q411 15q412 15q413 15q414 15q415 15q416 15q417 15q418 15q419 15q420 15q421 15q422 15q423 15q424 15q425 15q426 15q427 15q428 15q429 15q430 15q431 15q432 15q433 15q434 15q435 15q436 15q437 15q438 15q439 15q440 15q441 15q442 15q443 15q444 15q445 15q446 15q447 15q448 15q449 15q450 15q451 15q452 15q453 15q454 15q455 15q456 15q457 15q458 15q459 15q460 15q461 15q462 15q463 15q464 15q465 15q466 15q467 15q468 15q469 15q470 15q471 15q472 15q473 15q474 15q475 15q476 15q477 15q478 15q479 15q480 15q481 15q482 15q483 15q484 15q485 15q486 15q487 15q488 15q489 15q490 15q491 15q492 15q493 15q494 15q495 15q496 15q497 15q498 15q499 15q500 15q501 15q502 15q503 15q504 15q505 15q506 15q507 15q508 15q509 15q510 15q511 15q512 15q513 15q514 15q515 15q516 15q517 15q518 15q519 15q520 15q521 15q522 15q523 15q524 15q525 15q526 15q527 15q528 15q529 15q530 15q531 15q532 15q533 15q534 15q535 15q536 15q537 15q538 15q539 15q540 15q541 15q542 15q543 15q544 15q545 15q546 15q547 15q548 15q549 15q550 15q551 15q552 15q553 15q554 15q555 15q556 15q557 15q558 15q559 15q560 15q561 15q562 15q563 15q564 15

**Black:** ARGHAP11B isoforms described in this study

Blue: RefSeq and UCSC Genes

Gray: Segmental duplication blocks (UCSC color code for 90-98% sequence identity)

12

## Validation of *GTF2I* isoform by an orthogonal data type (ONT)

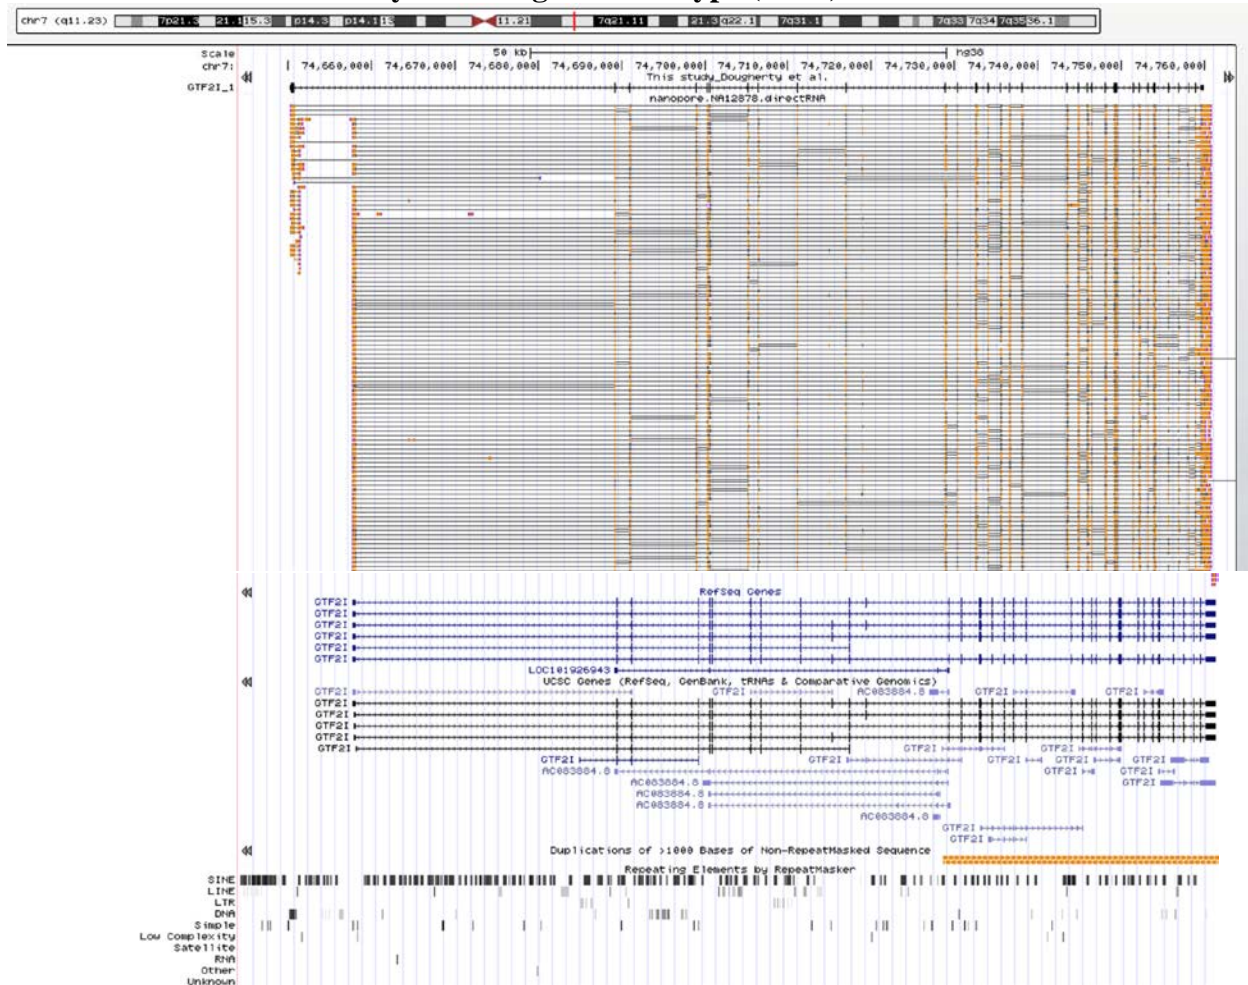

UCSC Genome Browser snapshot for hg38 chr7:74,644,295-74,763,681 displaying (from top):

**Black:** *GTF2I* isoform described in this study

**Orange:** Oxford Nanopore (ONT) direct RNA-seq reads

**Blue:** RefSeq and UCSC Genes

**Orange:** Segmental duplication blocks (UCSC color code for 98-99% sequence identity)

**Black:** Repeat elements by RepeatMasker

Summary: This study uncovered a new isoform of the general transcription factor, *GTF2I*, with a new first exon encoded by a repeat element of the TcMar-Tigger 7 DNA family. The ONT data are abundant in this region and a subset of the reads (~25%) are shown. ONT reads (n = 8) support the Tigger7 exon splicing to exon 2 of the canonical *GTF2I* isoform shown in RefSeq. In the RepeatMasker track, the repeat element at the coordinates of the first exon is:

**Name:** Tigger7

**Family:** TcMar-Tigger

**Class:** DNA

**Position:** [chr7:74650211-74650770](#)

## Validation of *GTF2IRD2B* isoform by an orthogonal data type (Sanger)

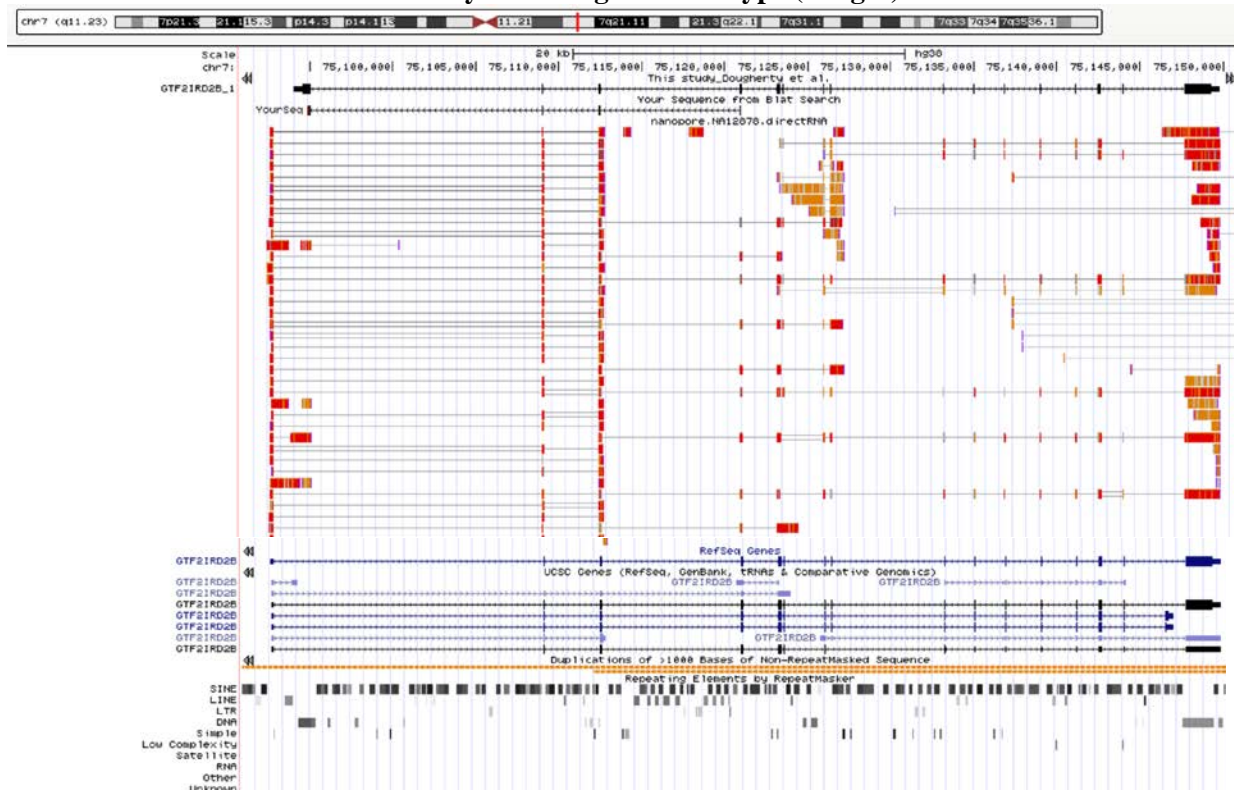

UCSC Genome Browser snapshot for hg38 chr7:75,090,834-75,150,884 displaying (from top):

**Black:** *GTF2IRD2B* isoform described in this study

**Black:** “Your sequence from BLAT results” is Sanger sequence generated from the validation PCR product

**Red/Orange:** Oxford Nanopore (ONT) direct RNA-seq reads

**Blue:** RefSeq and UCSC Genes

**Orange:** Segmental duplication blocks (UCSC color code for 98-99% sequence identity)

**Black:** Repeat elements by RepeatMasker

Summary: This study uncovered a new isoform from the gene family *GTF2IRD2*, with a new first exon encoded by a repeat element of the TcMar-Tigger7 DNA family. To validate this first exon, we generated oligonucleotide primers against the Tigger exon (5') and in exon 4 of *GTF2IRD2* (3'). The PCR product amplified from brain cDNA was Sanger sequenced from the 3' primer and the BLAT results are shown. The sequence is definitely derived from *GTF2IRD* (and not the ancestral *GTF2I*), we cannot assign whether it is derived from the *GTF2IRD2* or *GTF2IRD2B* locus due to a lack of paralog-specific nucleotides. The ONT data are abundant in this region and a subset of the reads (~50%) are shown. No ONT reads were found that support the Tigger7 exon splicing to exon 2 of the canonical *GTF2IRD2* isoform shown currently in RefSeq. In the RepeatMasker track, the repeat element at the coordinates of the first exon is:

**Name:** Tigger7

**Family:** TcMar-Tigger

**Class:** DNA

**Position:** [chr7:75094267-75095000](#)

## Validation of *SRGAP2B* isoform by an orthogonal data type (ONT)

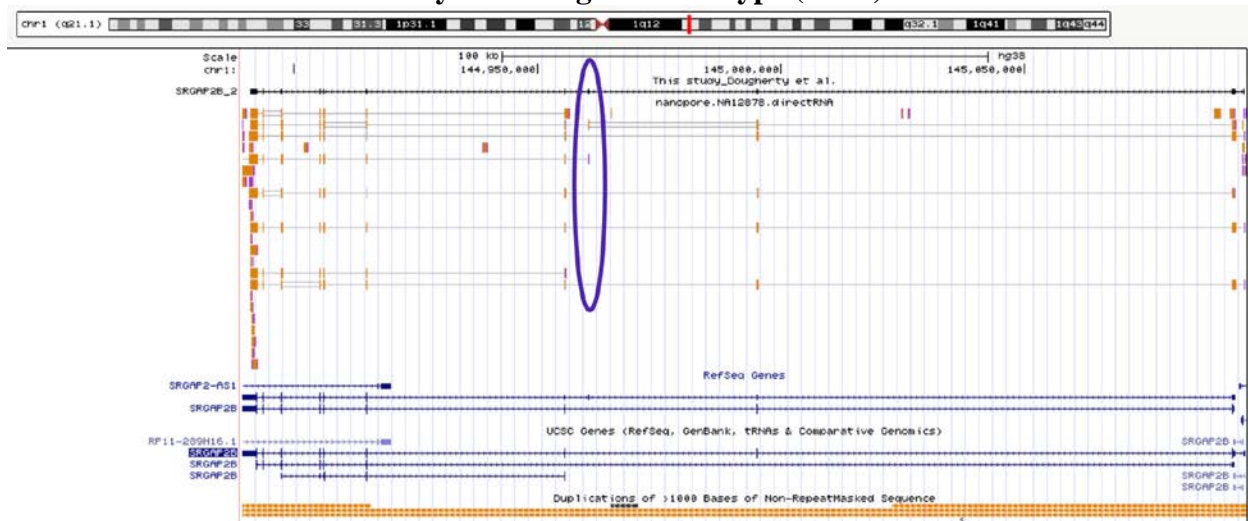

UCSC Genome Browser snapshot for hg38 chr1:144,889,249-145,095,824 displaying (from top):

**Black:** *SRGAP2B* isoform described in this study

**Orange:** Oxford Nanopore (ONT) direct RNA-seq reads

**Purple** oval represents the 61 nucleotide exon described in lines 336-349 and depicted in Figure 6 of the manuscript.

**Blue:** RefSeq and UCSC Genes

**Orange:** Segmental duplication blocks (UCSC color code for 98-99% sequence identity)

**Summary:** This study uncovered a new isoform of *SRGAP2B*, with a different first exon than RefSeq annotation and containing a 61 nucleotide (nt) exon that results in ORF truncation. The ONT data are sparse in this region, perhaps due to low expression levels in this cell line. However, among the data here, two ONT reads (one ~full-length read and one partial) support the inclusion of the 61nt exon. The sequence identity level is likely too high in this duplication block to confidently assign these reads to one *SRGAP2* paralog, but our data supports assignment of these two reads specifically to the *SRGAP2B* copy since inclusion of this exon is only seen among this paralog's transcripts. (Figure 6 explains the paralog-specific splice site change as rationale.) Note that the new isoform combines features of two known isoforms derived from this paralog. The RefSeq track shows an isoform that includes the 61nt exon, but it does not harbor the same promoter as our new isoform. Conversely, the UCSC Genes track does display an isoform with the same promoter as our new isoform, but it does not include the 61nt exon.
