# Supplementary material for: Transcriptional fates of human-specific segmental duplications in brain
Source: HighWire-hosted journal article supplement (doi:10.1101/gr.237610.118), 2018-09-18
Supplement: Supplemental_Tables.xlsx [file Supplemental_Tables.xlsx]

## Sheet: Table S1
Table S1. Probe design, including targeted gene families and number of probes.
Design	Category	Region	Gene Family	Duplication type*	Copies*	No human CN reversions**	Length (anc)	No. probes
HSD Panel I	HSD	chr1	NOTCH2	partial	5	?	11474	8
515 total probes	HSD	1q12	GPR89	complete	2	x	2150	12
	HSD	chr1	FAM72	complete	4	x	2400	4
	HSD	chr1	SRGAP2	partial	4	x	4917	29
	HSD	2p11.2,2q13	CD8B	complete	2	x	934	7
	HSD	2q21.1	TISP43	complete	2		2036	12
	HSD	2q21.1	CFC1	complete	2	x	1447	11
	HSD	7q11.23	GTF2I	partial	3	x	4445	18
	HSD	7q11.23	NCF1	complete	3	x	1459	10
	HSD	7q11.23	GTF2IRD2	partial	3	x	625	10
	HSD	10q11.22	GPRIN2	complete	2	x	1823	12
	HSD	10q11.22	PTPN20	partial	2	x	1885	11
	HSD	10q11.22	NPY4R	complete	2	x	1800	10
	HSD	10q11.22	FRMPD2	partial	2	x	1892	10
	HSD	15q13.3	ARHGAP11	partial	2	x	5898	33
	HSD	16p11.2	BOLA2	complete	3	x	1012	6
	HSD	16p11.2	CORO1A	partial	3		1815	2
	HSD	16p11.2	SLX1A	complete	3		828	5
	HSD	16q22.2,1q21.1	HYDIN	partial	2	x	3122	80
	HSD	18q11.1,18p11.2	ROCK1	partial	2		6648	5
	ASD	1q21.3	POGZ	n/a	1		6153	22
	ASD	14q11.2	CHD8	n/a	1		7475	49
	ASD	20q13.13	ADNP	n/a	1		5966	19
	ASD	21q22.13	DYRK1A	n/a	1		5088	17
	splicing	2p16.3	NRXN1	n/a	1		5575	43
	splicing	11q13.1	NRXN2	n/a	1		3535	32
	splicing	14q24.3-31.1	NRXN3	n/a	1		8578	38
HSD Panel II	HSD	1q21.1,14q23.1	GNRHR2	partial	2		1035	4
525 total probes	HSD	1q21.1,14q23.1	RBM8	partial	2		4974	5
	HSD	chr1	FCGR1A	complete	4	x	2268	7
	HSD	chr1	HIST2H2BF	complete	4	x	999	8
	HSD	2p11.2,2q13	LINC00152	partial	2		518	5
	HSD	2p11.2,2q13	ANAPC1	partial	2		7753	48
	HSD	5q13.2	OCLN	partial	2		6451	13
	HSD	5q13.2	GTF2H2	complete	2		1951	8
	HSD	5q13.2	SERF1	complete	2		1935	2
	HSD	5q13.2	SMN1	complete	2		1641	6
	HSD	5q13.2	NAIP	partial	3		5880	30
	HSD	16p11.2/6p	DUSP22	complete	2		3518	6
	HSD	6p22.2,9q22.3	ZNF322	partial	2		4892	11
	HSD	7q35	TCAF2	partial	2		2997	23
	HSD	7q35	OR2A1	complete	2		933	11
	HSD	7q35	ARHGEF5	partial	3		5505	40
	HSD	10q11.22	LOC643650	complete	2		2872	8
	HSD	15q13.3	CHRNA7	partial	4		3443	10
	HSD	7q35	TCAF1	partial	2		5682	18
	ASD	4q25-26	ANK2	n/a	1		8082	47
	ASD	6q25.3	ARID1B	n/a	1		9609	30
	ASD	12p13.1	GRIN2B	n/a	1		5941	38
	ASD	17p13.1	KDM6B	n/a	1		6704	20
	ASD	21q22.2	DSCAM	n/a	1		7055	50
	SV gene	1p21.1	amylase	n/a	6‡		1862	60
	SV gene	17q21.31	KANSL1	n/a	1		5059	17
*For HSDs, rounded haploid copy number in HGDP. Derived from Dennis et al. 2017 Table S1. Exceptions are NOTCH2,GNRHR2,RBM8,LINC00152,ANAPC1,ZNF322,LOC643650 (taken from GRCh38), SLX1A (inferred, adjacent to BOLA2).
**Derived from Dennis et al. 2017 Table S8
‡Highly polymorphic, 6 in reference counting 1 pseudogene

## Sheet: Table S2a
Table S2a. HSD1 probe design sequences
SequenceName	Sequence
117722_4941114_NOTCH2_1_1_1	GTAAGGAGTGCCAATGGACGGATGCCTGCCTGTCTCATCCCTGTGCAAATGGAAGTACCTGTACCACTGTGGCCAACCAGTTCTCCTGCAAATGCCTCACAGGCTTCACAGGGCAGAAAT
117722_4941114_NOTCH2_1_1_2	CAGGGCAGAAATGTGAGACTGATGTCAATGAGTGTGACATTCCAGGACACTGCCAGCATGGTGGCACCTGCCTCAACCTGCCTGGTTCCTACCAGTGCCAGTGCCCTCAGGGCTTCACAG
117722_4941114_NOTCH2_1_1_3	AGGGCTTCACAGGCCAGTACTGTGACAGCCTGTATGTGCCCTGTGCACCCTCACCTTGTGTCAATGGAGGCACCTGTCGGCAGACTGGTGACTTCACTTTTGAGTGCAACTGCCTTCCAG
117722_4941115_NOTCH2_2_1_1	ATGTCCAGAAGGCTTCTTGGGGGAATATTGTCAACATCGAGACCCCTGTGAGAAGAACCGCTGCCAGAATGGTGGGACTTGTGTGGCCCAGGCCATGCTGGGGAAAGCCACGTGCCGATG
117722_4941115_NOTCH2_2_1_2	GGTGGGACTTGTGTGGCCCAGGCCATGCTGGGGAAAGCCACGTGCCGATGTGCCTCAGGGTTTACAGGAGAGGACTGCCAGTACTCAACATCTCATCCATGCTTTGTGTCTCGACCCTGC
117722_4941115_NOTCH2_2_1_3	AGGACTGCCAGTACTCAACATCTCATCCATGCTTTGTGTCTCGACCCTGCCTGAATGGCGGCACATGCCATATGCTCAGCCGGGATACCTATGAGTGCACCTGTCAAGTCGGGTTTACAG
117722_4941116_NOTCH2_3,4_1_1	ACCGAGAAGATGCCCGCCCTGCGCCCCGCTCTGCTGTGGGCGCTGCTGGCGCTCTGGCTGTGCTGCGCGGCCCCCGCGCATGCATTGCAGTGTCGAGATGGCTATGAACCCTGTGTAAAT
117722_4941116_NOTCH2_3,4_1_2	GCTGGCGCTCTGGCTGTGCTGCGCGGCCCCCGCGCATGCATTGCAGTGTCGAGATGGCTATGAACCCTGTGTAAATGAAGGAATGTGTGTTACCTACCACAATGGCACAGGATACTGCAA
117722_4941117_SRGAP2C_1_1_1	GCAAGTGAACCGGAGCAAACGACTTCCGATCCAGTCTGCGCTGTTGCGGCTCCCGTTTGGGATTTGATTTGCAGCATCTTTGAGCCTCTACGACAAAAAACCGCGAAGCACGCCCAGCCC
117722_4941117_SRGAP2C_1_1_2	AACCGCGAAGCACGCCCAGCCCTCCCCCGGCACCCCGAAAAGCACCCACTCCCTCCCGGGGACACAGCTGGGCGCGTCCACACCCCCGCAGCCCCACACCATGTTGTGCGGAAGGACTTC
117722_4941117_SRGAP2C_1_1_3	CCATGTTGTGCGGAAGGACTTCCACTCCCCGCCTGTGTCGTTGATGTCAGACCCCAGGCCAGCCTCCGGGCGCTGCAGTTCTCCCGGCTAATGCTGAGGCTGCGGCTCCGGCTCTAGCAC
117722_4941117_SRGAP2C_1_1_4	GCTGCGGCTCCGGCTCTAGCACAGGCACCAGCCGCCGCCGCACCCGGCCTCAGCGCCCACCGTCTGCATGTGCCCGCCGTAGCCGTCTGCCCAGCCCGCAGCCCGCGCTCCACGGAGCGC
117722_4941117_SRGAP2C_1_1_5	CAGCCCGCGCTCCACGGAGCGCTGGAGACCACCGTGGGGGGCCCCTTCTGCCCTCGAGAGAAGCGGTCTTGGAGGTATTGATTTAGGTGGTTGGATTTTTTCCGTGGATCTATCAATTCA
117722_4941117_SRGAP2C_1_1_6	TTTCCGTGGATCTATCAATTCACAATTCGAATTTGGAAGAAAGAAGGAAAACATGACGTCTCCAGCCAAATTCAAAAAGGATAAGGAGATCATAGCAGAGTACGATACTCAGGTCAAAG
117722_4941123_SRGAP2C_8_1_1	GCTTCCCAGCTCTGTGCCCAGCAGCCTGTCCAGAGTGAGCTGGTACAGAGATGCCAACAACTGCAGTCTCGCTTATCCACTCTAAAGATTGAAAACGAAGAGGTGAGTTTCTTCCTTAGG
117722_4941123_SRGAP2C_8_1_2	CTTCCCAGCTCTGTGCCCAGCAGCCTGTCCAGAGTGAGCTGGTACAGAGATGCCAACAACTGCAGTCTCGCTTATCCACTCTAAAGATTGAAAACGAAGAGGTGAGTTTCTTCCTTAGGA
117722_4941130_GPR89_1-14_1_1	ATGAGTTTCCTCATCGACTCCAGCATCATGATTACCTCCCAGATACTATTTTTTGGATTTGGGTGGCTTTTCTTCATGCGCCAATTGTTTAAAGACTATGAGATACGTCAGTATGTTGTA
117722_4941130_GPR89_1-14_1_2	TGTTGTACAGGTGATCTTCTCCGTGACGTTTGCATTTTCTTGCACCATGTTTGAGCTCATCATCTTTGAAATCTTAGGAGTATTGAATAGCAGCTCCCGTTATTTTCACTGGAAAATGAA
117722_4941130_GPR89_1-14_1_3	AAATGAACCTGTGTGTAATTCTGCTGATCCTGGTTTTCATGGTGCCTTTTTACATTGGCTATTTTATTGTGAGCAATATCCGACTACTGCATAAACAACGACTGCTTTTTTCCTGTCTCT
117722_4941130_GPR89_1-14_1_4	TGTCTCTTATGGCTGACCTTTATGTATTTCTTCTGGAAACTAGGAGATCCCTTTCCCATTCTCAGCCCAAAACATGGGATCTTATCCATAGAACAGCTCATCAGCCGGGTTGGTGTGATT
117722_4941130_GPR89_1-14_1_5	TGTGATTGGAGTGACTCTCATGGCTCTTCTTTCTGGATTTGGTGCTGTCAACTGCCCATACACTTACATGTCTTACTTCCTCAGGAATGTGACTGACACGGATATTCTAGCCCTGGAACG
117722_4941130_GPR89_1-14_1_6	TGGAACGGCGACTGCTGCAAACCATGGATATGATCATAAGCAAAAAGAAAAGGATGGCAATGGCACGGAGAACAATGTTCCAGAAGGGGGAAGTGCATAACAAACCATCAGGTTTCTGGG
117722_4941130_GPR89_1-14_1_7	TTCTGGGGAATGATAAAAAGTGTTACCACTTCAGCATCAGGAAGTGAAAATCTTACTCTTATTCAACAGGAAGTGGATGCTTTGGAAGAATTAAGCAGGCAGCTTTTTCTGGAAACAGCT
117722_4941130_GPR89_1-14_1_8	AACAGCTGATCTATATGCTACCAAGGAGAGAATAGAATACTCCAAAACCTTCAAGGGGAAATATTTTAATTTTCTTGGTTACTTTTTCTCTATTTACTGTGTTTGGAAAATTTTCATGGC
117722_4941130_GPR89_1-14_1_9	TCATGGCTACCATCAATATTGTTTTTGATCGAGTTGGGAAAACGGATCCTGTCACAAGAGGCATTGAGATCACTGTGAATTATCTGGGAATCCAATTTGATGTGAAGTTTTGGTCCCAAC
117722_4941130_GPR89_1-14_1_10	TCCCAACACATTTCCTTCATTCTTGTTGGAATAATCATCGTCACATCCATCAGAGGATTGCTGATCACTCTTACCAAGTTCTTTTATGCCATCTCTAGCAGTAAGTCCTCCAATGTCATT
117722_4941130_GPR89_1-14_1_11	TGTCATTGTCCTGCTATTAGCACAGATAATGGGCATGTACTTTGTCTCCTCTGTGCTGCTGATCCGAATGAGTATGCCTTTAGAATACCGCACCATAATCACTGAAGTCCTTGGAGAACT
117722_4941130_GPR89_1-14_1_12	GAGAACTGCAGTTCAACTTCTATCACCGTTGGTTTGATGTGATCTTCCTGGTCAGCGCTCTCTCTAGCATACTCTTCCTCTATTTGGCTCACAAACAGGCACCAGAGAAGCAAATGGCAC
117722_4941131_HYDIN2_1_1_2	TCCTGAAATGGGCATATCCCTGGCTGGCCTGGAACCAACCTTTCGGACTTAGGACTATGGGAAGAATAGGGGGAGATTCTCTAGTGATGATAATACATGAATGCTTTAAAAGCTAGAACA
117722_4941132_HYDIN2_2_1_1	GGTACTAGCGATTCCACTGGGCGCTGTAGGCAGGGCGCACTCACCGAACTCCCCCATCCCTTCCAGCCTCAGGGCCCGCCTGGCAGGACTACTGAGCAAGGCCTTGGAAAATCGGAGCGA
117722_4941132_HYDIN2_2_1_2	CGATTCCACTGGGCGCTGTAGGCAGGGCGCACTCACCGAACTCCCCCATCCCTTCCAGCCTCAGGGCCCGCCTGGCAGGACTACTGAGCAAGGCCTTGGAAAATCGGAGCGATTAGAGCG
117722_4941139_POGZ_4_1_1	GAGTGTCATGGGCCGGCAGACATGCCTGGAGTGCAGCTTCGAGATCCCAGACTTCCCTAATCATTTCCCTACTTACGTACACTGCTCTCTGTGTCGCTATAGCACCTGCTGTTCTCGAGC
117722_4941139_POGZ_4_1_2	ATGCCTGGAGTGCAGCTTCGAGATCCCAGACTTCCCTAATCATTTCCCTACTTACGTACACTGCTCTCTGTGTCGCTATAGCACCTGCTGTTCTCGAGCTTATGCCAACCACATGATCAA
117722_4941140_POGZ_5_1_1	GTGACAATCCGGGCTTCCCGAGGGCAGCCACGAACTGTTCCTGTATCCTCTAATGATACACCTCCCAGCGCCTTGCAGGAGGCAGCACCGCTGACCTCCTCAATGGACCCTCTGCCTGTC
117722_4941140_POGZ_5_1_2	TGATACACCTCCCAGCGCCTTGCAGGAGGCAGCACCGCTGACCTCCTCAATGGACCCTCTGCCTGTCTTCCTTTATCCCCCTGTCCAGCGCAGCATCCAGAAGAGAGCTGTTAGGAAAAT
117722_4941141_POGZ_6_1_1	AAGAGAAATGTTTATCACTGCAACAAATGCCGGCTGCAGTTTCTCTTTGCCAAGGACAAAATTGAACACAAGCTTCAACACCATAAAACCTTCCGTAAACCCAAGCAGCTGGAGGGCTTG
117722_4941141_POGZ_6_1_2	CACTGCAACAAATGCCGGCTGCAGTTTCTCTTTGCCAAGGACAAAATTGAACACAAGCTTCAACACCATAAAACCTTCCGTAAACCCAAGCAGCTGGAGGGCTTGAAACCAGGCACCAAG
117722_4941142_POGZ_7_1_1	GTGTGTCAATATCGCTCCTCACTCTACTCTGAGGTAGATGTCCATTTTCGGATGATCCATGAGGATACCCGGCATCTGCTCTGCCCTTATTGCCTGAAGGTCTTCAAAAATGGCAATGCA
117722_4941142_POGZ_7_1_2	TCTGAGGTAGATGTCCATTTTCGGATGATCCATGAGGATACCCGGCATCTGCTCTGCCCTTATTGCCTGAAGGTCTTCAAAAATGGCAATGCATTCCAACAGCATTACATGAGGCACCAG
117722_4941143_POGZ_9_1_1	ATTCATGAACCATATGAAACACCACGTAGAACTCGATCAGCAGAACGGTGAGGTAGATGGTCACACTATCTGCCAGCACTGTTACCGCCAGTTTTCCACTCCCTTCCAGCTTCAGTGCCA
117722_4941143_POGZ_9_1_2	ATCAGCAGAACGGTGAGGTAGATGGTCACACTATCTGCCAGCACTGTTACCGCCAGTTTTCCACTCCCTTCCAGCTTCAGTGCCACTTGGAAAATGTTCATAGTCCCTATGAATCTACTA
117722_4941144_POGZ_10_1_1	TACTGTTGCCCAGAAATGGTTGAATACCAGAAGAAAGGAAAGTCCCTGGATTCAGAACCCAGTGTCCCATCAGCAGCAAAGCCCCCATCCCCTGAGAAAACAGCTCCTGTTGCTTCCACA
117722_4941144_POGZ_10_1_2	TTGCTTCCACACCCTCTTCTACACCTATTCCTGCTCTGTCACCGCCTACCAAAGTACCAGAACCAAATGAGAACGTGGGCGATGCCGTCCAGACCAAACTCATTATGCTTGTAGATGACT
117722_4941144_POGZ_10_1_3	TGTAGATGACTTCTACTATGGACGGGATGGTGGCAAAGTAGCCCAGCTCACAAATTTCCCTAAGGTCGCCACATCTTTCCGATGCCCACATTGTACCAAAAGGCTAAAAAACAATATTCG
117722_4941145_POGZ_12_1_1	TGAGCATTGCCAGCTTTGTCACTGTGAAGCGACCTGGTGTTACAGGCGAAAATAGCAATGAAGTGGCCAAATTGGTGAATACCCTTAACACCATCCCTTCCCTGGGCCAGAGTCCTGGGC
117722_4941145_POGZ_12_1_2	TGGTGAATACCCTTAACACCATCCCTTCCCTGGGCCAGAGTCCTGGGCCAGTGGTGGTGTCCAACAACAGCTCTGCTCATGGCTCTCAAAGAACCAGCGGACCTGAGTCTTCAATGAAAG
117722_4941146_POGZ_13_1_1	CCCCAGGTACCCAGTTTGTTAAGCCGACAGTTGGAGTTCCACAAGTGTTCTCCCAGATGACCCCTGTGAGGCCAGGCTCCACAATGCCTGTGAGGCCCACCACCAACACCTTCACCACCG
117722_4941146_POGZ_13_1_2	CCTGTGAGGCCCACCACCAACACCTTCACCACCGTCATCCCGGCCACTCTTACCATTCGAAGCACCGTCCCACAGTCCCAGTCCCAGCAGACCAAGTCCACTCCCAGCACTTCTACCACT
117722_4941146_POGZ_13_1_3	GCAGACCAAGTCCACTCCCAGCACTTCTACCACTCCCACTGCCACACAGCCAACCTCACTGGGGCAACTAGCTGTTCAGTCTCCAGGCCAGTCAAACCAGACCACGAATCCCAAGCTAG
117722_4941147_POGZ_2_1_1	CTGGCAATCCTTTGGTCCAGCAAGGTGGACAGCCACTCATCCTGACCCAGAATCCAGCCCCAGGTCTGGGCACAATGGTTACTCAACCAGTATTGAGGCCTGTTCAGGTCATGCAGAATG
117722_4941147_POGZ_2_1_2	GCCCCAGGTCTGGGCACAATGGTTACTCAACCAGTATTGAGGCCTGTTCAGGTCATGCAGAATGCCAATCATGTGACTAGTTCCCCTGTGGCCTCACAACCAATATTTATCACTACGCAG
117722_4941148_POGZ_3_1_1	TTTCTGTGAGCCAGCAGCCAGTCTCGGCTCCAGTGCCCATCGCTGCCCATGCTTCTGTTGCTGGGCACCTCTCTACATCCACCACCGTTAGTAGCAGCGGGGCACAGAACAGCGACAGTA
117722_4941148_POGZ_3_1_2	TCGCTGCCCATGCTTCTGTTGCTGGGCACCTCTCTACATCCACCACCGTTAGTAGCAGCGGGGCACAGAACAGCGACAGTACAAAGAAGACTCTTGTCACACTAATTGCCAACAACAATG
117722_4941149_FAM72A_1-4_1_1	ATGTCTACCAACATTTGTAGTTTCAAGGACAGGTGCGTGTCCATCCTGTGTTGCAAATTCTGTAAACAAGTGCTCAGCTCTAGGGGAATGAAGGCTGTTTTGCTGGCTGATACTGAAATA
117722_4941149_FAM72A_1-4_1_2	TACTGAAATAGACCTTTTCTCTACAGACATCCCTCCTACCAACGCAGTGGACTTCACTGGAAGATGCTATTTCACCAAAATCTGCAAATGTAAACTGAAGGACATCGCATGTTTAAAATG
117722_4941149_FAM72A_1-4_1_3	GTTTAAAATGTGGGAACATTGTAGGTTATCATGTGATTGTTCCATGTAGTTCCTGTCTTCTTTCCTGCAACAACGGACACTTCTGGATGTTTCACAGCCAGGCAGTTTATGATATTAACA
117722_4941149_FAM72A_1-4_1_4	GATATTAACAGACTAGACTCCACAGGTGTAAACGTCCTACTTTGGGGCAACTTGCCAGAGATAGAAGAGAGTACAGATGAAGATGTGTTAAATATCTCAGCAGAGGAGTGTATTAGATAA
117722_4941150_SRGAP2A_2_1_1	AGATCCGTGCTCAGCTCACAGAGCAGATGAAATGCCTGGACCAGCAGTGTGAGCTTCGGGTGCAACTGTTGCAGGACCTCCAGGACTTCTTCCGAAAGAAGGCAGAGATTGAGATGGACT
117722_4941150_SRGAP2A_2_1_2	GGACCTCCAGGACTTCTTCCGAAAGAAGGCAGAGATTGAGATGGACTACTCCCGCAACCTGGAGAAGCTGGCAGAACGCTTCCTGGCCAAGACACGCAGCACCAAGGACCAGCAATTCAA
117722_4941151_SRGAP2A_3_1_1	GAAGGATCAGAATGTTCTCTCTCCAGTCAACTGCTGGAATCTCCTCTTAAACCAGGTGAAGCGGGAAAGCAGGGACCATACCACCCTGAGTGACATCTACCTGAATAATATCATTCCTCG
117722_4941151_SRGAP2A_3_1_2	CTCTTAAACCAGGTGAAGCGGGAAAGCAGGGACCATACCACCCTGAGTGACATCTACCTGAATAATATCATTCCTCGATTTGTACAAGTCAGCGAGGACTCAGGAAGACTCTTTAAAAAG
117722_4941152_SRGAP2A_5_1_1	GTGATGAAGACATATCACATGTACAATGCCGACAGCATCAGTGCTCAGAGCAAACTAAAGGAGGCGGAGAAGCAGGAGGAGAAGCAAATTGGTAAATCGGTAAAGCAGGAGGACCGGCAG
117722_4941152_SRGAP2A_5_1_2	TCGGTAAAGCAGGAGGACCGGCAGACCCCACGCTCCCCTGACTCCACGGCCAACGTTCGCATTGAGGAGAAACATGTCCGGAGGAGCTCAGTGAAGAAGATTGAGAAGATGAAGGAGAAG
117722_4941153_SRGAP2A_6_1_1	CGTCAAGCCAAGTACACGGAGAATAAGCTGAAGGCCATCAAAGCCCGGAATGAGTACTTGCTGGCTTTGGAGGCAACCAATGCATCTGTCTTCAAGTACTACATCCATGACCTATCTGAC
117722_4941153_SRGAP2A_6_1_2	AAGTACACGGAGAATAAGCTGAAGGCCATCAAAGCCCGGAATGAGTACTTGCTGGCTTTGGAGGCAACCAATGCATCTGTCTTCAAGTACTACATCCATGACCTATCTGACCTTATTGAT
117722_4941154_SRGAP2A_7_1_1	TGTTGTGACTTAGGCTACCATGCAAGTCTGAACCGGGCTCTACGCACCTTCCTCTCTGCTGAGTTAAACCTGGAACAGTCGAAGCATGAGGGTCTGGATGCCATCGAGAATGCAGTAGAA
117722_4941154_SRGAP2A_7_1_2	ATCGAGAATGCAGTAGAAAACCTGGATGCCACCAGTGACAAGCAGCGCCTCATGGAGATGTACAACAACGTCTTCTGCCCCCCTATGAAGTTTGAGTTTCAGCCCCACATGGGGGATATG
117722_4941155_SRGAP2A_9_1_1	GTAAAGAAGACAATGGAGGCCACCCTGCAAACCATCCAGGACATTGTGACTGTCGAGGACTTTGATGTGTCTGACTGCTTCCAGTACAGCAACTCCATGGAGTCCGTCAAGTCCACGGTC
117722_4941155_SRGAP2A_9_1_2	TTCCAGTACAGCAACTCCATGGAGTCCGTCAAGTCCACGGTCTCTGAAACCTTCATGAGCAAGCCCAGCATTGCTAAGAGGAGAGCCAACCAGCAAGAGACAGAGCAGTTTTATTTCACA
117722_4941156_SRGAP2A_10-14_1_1	AAAATGAAAGAGTACCTGGAGGGCAGGAACCTCATCACCAAGTTACAAGCCAAGCATGACCTTCTGCAGAAAACCCTGGGAGAAAGTCAGCGGACAGATTGCAGTCTAGCCAGGCGCAGC
117722_4941156_SRGAP2A_10-14_1_2	GGAGAAAGTCAGCGGACAGATTGCAGTCTAGCCAGGCGCAGCTCAACTGTGAGGAAACAGGACTCCAGCCAGGCAATTCCTCTGGTGGTGGAAAGCTGTATCCGGTTTATCAGCAGACAC
117722_4941156_SRGAP2A_10-14_1_3	CCTCTGGTGGTGGAAAGCTGTATCCGGTTTATCAGCAGACACGGACTACAGCATGAAGGAATTTTCCGGGTGTCAGGATCCCAGGTGGAAGTGAATGACATCAAAAATGCCTTTGAGAGA
117722_4941157_SRGAP2A_15_1_1	GAGAGGACCCCCTGGCTGGGGACCAGAACGACCATGACATGGATTCCATAGCTGGTGTCCTGAAGCTTTACTTCCGGGGGCTGGAACACCCTCTCTTCCCCAAGGACATCTTTCATGACC
117722_4941157_SRGAP2A_15_1_2	CTGGGGACCAGAACGACCATGACATGGATTCCATAGCTGGTGTCCTGAAGCTTTACTTCCGGGGGCTGGAACACCCTCTCTTCCCCAAGGACATCTTTCATGACCTGATGGCCTGCGTCA
117722_4941158_SRGAP2A_17_1_1	TTTATCACAGTTCAGTGAAGAGAACATGATGGACCCCTACAACCTCGCCATCTGCTTCGGGCCCTCGCTAATGTCAGTGCCAGAGGGCCACGACCAGGTGTCCTGCCAAGCCCACGTGAA
117722_4941158_SRGAP2A_17_1_2	CCAAGCCCACGTGAATGAGCTGATCAAAACCATCATCATCCAGCATGAGAACATCTTCCCAAGCCCCAGGGAGCTGGAGGGCCCTGTCTACAGCAGAGGAGGAAGCATGGAGGATTACTG
117722_4941159_SRGAP2A_19_1_1	AATGTGAGCCCATCGAGGCCATTGCCAAGTTTGACTACGTGGGCCGGACAGCCCGAGAGCTATCCTTTAAGAAGGGAGCATCCCTGCTGCTTTACCAGCGGGCTTCCGACGACTGGTGGG
117722_4941159_SRGAP2A_19_1_2	ATCCTTTAAGAAGGGAGCATCCCTGCTGCTTTACCAGCGGGCTTCCGACGACTGGTGGGAAGGCCGGCACAATGGCATCGACGGACTCATCCCCCATCAGTACATCGTGGTCCAAGACAC
117722_4941160_NRXN1_1_1_1	CCAACCCAACCCGAGCAGGCGGCAGAGAGCCGTATCCAGGCTCAGCAGAAGTGATCCGGGAGTCCAGCAGCACCACGGGTATGGTCGTTGGGATAGTAGCCGCTGCCGCCCTGTGCATCC
117722_4941160_NRXN1_1_1_2	AGTAGCCGCTGCCGCCCTGTGCATCCTTATCCTCCTCTATGCCATGTACAAGTACAGAAACCGGGATGAAGGCTCATACCATGTGGACGAGAGTCGAAACTACATCAGTAACTCAGCACA
117722_4941160_NRXN1_1_1_3	CGAAACTACATCAGTAACTCAGCACAGTCCAATGGGGCTGTTGTAAAGGAGAAACAACCCAGCAGTGCGAAAAGCTCCAACAAAAATAAGAAAAACAAGGATAAAGAGTATTATGTCTG
117722_4941161_NRXN1_3_1_1	GGCGTCAGCTCACAATCTTCAATAGCCAAGCAACCATAATAATTGGCGGGAAAGAGCAGGGCCAGCCCTTCCAGGGCCAGCTCTCTGGGCTGTACTACAATGGCTTGAAAGTTCTGAATA
117722_4941161_NRXN1_3_1_2	TGGCTTGAAAGTTCTGAATATGGCAGCCGAAAACGATGCCAACATCGCCATAGTGGGAAATGTGAGACTGGTTGGTGAAGTGCCTTCCTCTATGACAACTGAGTCAACAGCCACTGCCAT
117722_4941161_NRXN1_3_1_3	GAGTCAACAGCCACTGCCATGCAATCAGAGATGTCCACATCAATTATGGAGACTACCACGACCCTGGCTACTAGCACAGCCAGAAGAGGAAAGCCCCCGACAAAAGAACCCATTAGCCAG
117722_4941162_NRXN1_4_1_1	CACCAGGGAAAAATTGGAGTTAAGTTTAATGTTGGGACAGATGACATCGCCATTGAAGAATCCAATGCAATCATTAATGATGGGAAATACCATGTAGTTCGTTTCACGAGGAGTGGTGGC
117722_4941162_NRXN1_4_1_2	TTGAAGAATCCAATGCAATCATTAATGATGGGAAATACCATGTAGTTCGTTTCACGAGGAGTGGTGGCAATGCCACGTTGCAGGTGGACAGCTGGCCAGTGATCGAGCGCTACCCTGCAG
117722_4941163_NRXN1_5_1_1	CTGGGACGACATATATCTTTAGCAAAGGTGGTGGACAAATCACGTATAAGTGGCCTCCTAATGACCGACCCAGTACACGAGCAGACAGACTGGCCATAGGTTTTAGCACTGTTCAGAAAG
117722_4941163_NRXN1_5_1_2	GACCGACCCAGTACACGAGCAGACAGACTGGCCATAGGTTTTAGCACTGTTCAGAAAGAAGCCGTATTGGTGCGAGTGGACAGTTCTTCAGGCTTGGGTGACTACCTAGAACTGCATATA
117722_4941164_NRXN1_6_1_1	GCCCAGCACAACCTGCCAAGAGGACTCATGTTCCAATCAAGGTGTGTGCTTGCAACAATGGGATGGCTTCAGCTGTGACTGTAGTATGACTTCCTTCAGTGGACCACTCTGCAATGACC
117722_4941165_NRXN1_7_1_1	GTGACTTATATATAGGAGGAGTAGCTAAAGAAACATACAAATCCTTACCAAAACTTGTACATGCCAAAGAAGGCTTTCAAGGCTGCCTGGCATCAGTTGATTTAAATGGACGGCTTCCGG
117722_4941165_NRXN1_7_1_2	TTGTACATGCCAAAGAAGGCTTTCAAGGCTGCCTGGCATCAGTTGATTTAAATGGACGGCTTCCGGACCTCATCTCCGATGCTCTTTTCTGCAACGGACAGATCGAGAGAGGATGTGAAG
117722_4941166_NRXN1_8_1_1	GTACTTACATTACGTGTTTGATTTGGGAAATGGTGCTAACCTCATCAAAGGAAGCTCAAATAAACCTCTCAATGACAATCAGTGGCACAACGTGATGATATCAAGGGACACCAGCAACCT
117722_4941166_NRXN1_8_1_2	ATGACAATCAGTGGCACAACGTGATGATATCAAGGGACACCAGCAACCTCCACACTGTAAAGATTGACACAAAAATCACAACGCAAATCACCGCCGGAGCCAGGAACTTAGACCTCAAGA
117722_4941167_NRXN1_9_1_1	GTCAAATGGCAGGTGATCATACTAGGCTGGAGTTCCATAACATAGAGACTGGCATCATCACAGAACGACGGTATCTTTCTTCTGTCCCCTCCAACTTCATTGGACACCTGCAGAGCTTGA
117722_4941167_NRXN1_9_1_2	CCTCCAACTTCATTGGACACCTGCAGAGCTTGACATTTAATGGAATGGCATACATTGACCTGTGTAAAAATGGCGACATAGATTACTGTGAGCTTAATGCCAGATTTGGCTTCAGGAACA
117722_4941167_NRXN1_9_1_3	GTGAGCTTAATGCCAGATTTGGCTTCAGGAACATCATAGCAGATCCTGTCACCTTCAAGACCAAATCGAGCTATGTTGCCTTAGCTACCTTGCAAGCCTACACTTCTATGCATCTTTTTT
117722_4941167_NRXN1_9_1_4	CCTTGCAAGCCTACACTTCTATGCATCTTTTTTTCCAGTTCAAGACAACATCCCTAGATGGATTAATTCTATATAACAGTGGGGATGGAAATGACTTTATTGTGGTTGAATTAGTTAAAG
117722_4941168_NRXN1_10_1_1	GCAAAGGTCCCGAGACTCTTTTTGCTGGCTATAACCTCAATGATAACGAGTGGCACACAGTGCGTGTAGTTCGGCGTGGAAAAAGTTTAAAGTTAACAGTGGATGACCAACAGGCCATGA
117722_4941168_NRXN1_10_1_2	AAGGTCCCGAGACTCTTTTTGCTGGCTATAACCTCAATGATAACGAGTGGCACACAGTGCGTGTAGTTCGGCGTGGAAAAAGTTTAAAGTTAACAGTGGATGACCAACAGGCCATGACAG
117722_4941169_NRXN1_11_1_1	AGGCAACGGTTTTGAGCTATGATGGGAGCATGTTTATGAAAATTCAGCTCCCCGTAGTCATGCATACGGAGGCTGAGGATGTTTCCTTACGGTTCCGATCCCAGCGTGCATATGGCATTC
117722_4941169_NRXN1_11_1_2	CCTTACGGTTCCGATCCCAGCGTGCATATGGCATTCTGATGGCAACCACTTCTAGAGACTCTGCTGACACCCTCCGCCTGGAGCTAGACGCAGGACGTGTGAAACTGACGGTCAATCTAG
117722_4941170_NRXN1_12_1_1	GTACCATTTCTGTCAACACGTTGCGTACTCCCTACACTGCTCCTGGTGAGAGTGAGATTCTGGACCTGGATGATGAGTTGTACCTGGGGGGGCTGCCAGAAAATAAAGCTGGCCTTGTCT
117722_4941170_NRXN1_12_1_2	GGGGCTGCCAGAAAATAAAGCTGGCCTTGTCTTCCCCACCGAGGTGTGGACTGCTCTGCTCAACTATGGCTACGTGGGCTGCATCAGGGATTTGTTCATCGATGGCCAAAGCAAAGATAT
117722_4941170_NRXN1_12_1_3	GATTTGTTCATCGATGGCCAAAGCAAAGATATCCGGCAAATGGCTGAAGTTCAAAGTACTGCTGGAGTGAAGCCTTCCTGCTCAAAGGAAACAGCAAAACCGTGCCTTAGCAACCCTTGC
117722_4941170_NRXN1_12_1_4	AAACAGCAAAACCGTGCCTTAGCAACCCTTGCAAAAACAATGGCATGTGCAGGGATGGGTGGAACAGATATGTCTGTGATTGTTCCGGAACAGGCTATCTTGGCAGGTCCTGTGAGAGAG
117722_4941171_NRXN1_13_1_1	GTTGTATATAAAAATAATGATGTGAGGCTGGAATTATCTCGACTTGCCAAGCAAGGAGATCCTAAGATGAAGATCCATGGAGTGGTGGCATTTAAATGTGAGAATGTTGCAACTTTAGAC
117722_4941171_NRXN1_13_1_2	TTGCAACTTTAGACCCAATCACCTTTGAAACCCCAGAGTCTTTCATCTCTTTGCCTAAATGGAATGCAAAGAAAACTGGCTCCATATCATTTGATTTCCGTACAACAGAGCCAAATGGCC
117722_4941171_NRXN1_13_1_3	AGAGCCAAATGGCCTCATCTTATTTAGCCATGGCAAGCCAAGACATCAGAAAGATGCCAAGCACCCACAGATGATAAAGGTGGACTTCTTTGCTATTGAGATGCTAGATGGCCACCTCTA
117722_4941171_NRXN1_13_1_4	GATGGCCACCTCTACCTCCTCCTGGACATGGGGTCAGGTACTATAAAAATAAAAGCCCTGTTGAAGAAAGTGAATGATGGAGAATGGTATCATGTGGACTTCCAGAGAGACGGACGGTCA
117722_4941172_NRXN1_14_1_1	GTGACAATATCAGTGGATGGGATTCTTACCACAACGGGCTACACGCAAGAAGATTATACCATGCTGGGGTCTGATGACTTTTTCTATGTTGGAGGCAGTCCCAGCACAGCCGACCTTCCA
117722_4941172_NRXN1_14_1_2	ACGCAAGAAGATTATACCATGCTGGGGTCTGATGACTTTTTCTATGTTGGAGGCAGTCCCAGCACAGCCGACCTTCCAGGGTCACCAGTCAGTAACAACTTTATGGGCTGTCTCAAAGAG
117722_4941173_NRXN1_15_1_1	AGGAAAAGAAGAATATATTGCCACGTTCAAAGGATCTGAATACTTCTGCTACGACTTGTCTCAAAACCCCATTCAAAGCAGCAGTGATGAAATAACTCTGTCATTTAAAACCCTTCAGAG
117722_4941173_NRXN1_15_1_2	TAACTCTGTCATTTAAAACCCTTCAGAGGAATGGACTGATGCTTCACACTGGGAAATCGGCTGATTATGTCAATCTTGCCCTGAAAAATGGAGCTGTCTCTCTGGTCATTAATTTGGGAT
117722_4941173_NRXN1_15_1_3	GCTGTCTCTCTGGTCATTAATTTGGGATCAGGGGCCTTTGAAGCACTAGTGGAGCCTGTGAATGGAAAGTTTAATGATAATGCCTGGCATGATGTGAAAGTCACCAGGAATCTGCGTCAG
117722_4941174_NRXN1_17_1_1	ATGGGGACGGCGCTGCTCCAGCGCGGGGGCTGTTTTCTTCTGTGCCTCTCGCTGCTGCTCCTGGGCTGCTGGGCGGAGCTGGGCAGCGGGCTGGAGTTTCCGGGCGCCGAGGGCCAATGG
117722_4941174_NRXN1_17_1_2	AGGGCCAATGGACGCGCTTCCCCAAGTGGAACGCCTGCTGCGAGAGCGAGATGAGCTTCCAGCTCAAGACTCGCAGCGCCCGCGGCCTCGTGCTCTACTTCGACGACGAGGGCTTCTGCG
117722_4941174_NRXN1_17_1_3	GGGCTTCTGCGACTTCCTGGAGCTGATTCTGACGCGCGGCGGCCGCCTGCAGCTCAGCTTCTCCATCTTCTGCGCTGAGCCTGCGACGCTCCTGGCCGACACGCCGGTTAACGACGGCGC
117722_4941174_NRXN1_17_1_4	AACGACGGCGCCTGGCACAGCGTGCGCATCCGCCGCCAGTTCCGCAACACCACGCTCTTCATCGACCAGGTGGAGGCCAAGTGGGTGGAGGTCAAGTCCAAGCGCAGGGACATGACGGTG
117722_4941174_NRXN1_17_1_5	ACATGACGGTGTTCAGCGGCCTTTTCGTCGGGGGGCTGCCCCCGGAACTGCGCGCCGCGGCGCTCAAGCTCACCCTGGCCTCGGTGAGGGAGCGGGAGCCCTTCAAGGGGTGGATTCGTG
117722_4941174_NRXN1_17_1_6	GTGGATTCGTGACGTGAGGGTCAACTCCTCGCAGGTCCTGCCCGTGGACAGCGGCGAGGTGAAGCTGGACGATGAGCCGCCCAACAGCGGCGGGGGAAGCCCGTGCGAGGCGGGCGAGGA
117722_4941174_NRXN1_17_1_7	GCGGGCGAGGAGGGCGAGGGCGGGGTGTGCCTCAACGGAGGTGTGTGCTCCGTGGTGGACGACCAGGCCGTGTGCGACTGCTCGCGAACCGGCTTCCGCGGCAAGGACTGCAGCCAAG
117722_4941175_CD8B_1_1_1	GCCTCAAGGGGAAGGTATATCAGGAACCTTTGTCCCCCAATGCCTGCATGGATACTACAGCAATACTACAACCTCACAGAAGCTGCTTAACCCATGGATCCTGAAAACATAGGCAAGAAG
117722_4941176_CD8B_2-4_1_1	TTGATTTCCTTCCCACCACTGCCCAGCCCACCAAGAAGTCCACCCTCAAGAAGAGAGTGTGCCGGTTACCCAGGCCAGAGACCCAGAAGGGCCCACTTTGTAGCCCCATCACCCTTGGCC
117722_4941176_CD8B_2-4_1_2	TTGTAGCCCCATCACCCTTGGCCTGCTGGTGGCTGGCGTCCTGGTTCTGCTGGTTTCCCTGGGAGTGGCCATCCACCTGTGCTGCCGGCGGAGGAGAGCCCGGCTTCGTTTCATGAAACA
117722_4941177_CD8B_5_1_1	TCTCCATGGCAACTCAGTCCTCCAGCAGACCCCTGCATACATAAAGGTGCAAACCAACAAGATGGTGATGCTGTCCTGCGAGGCTAAAATCTCCCTCAGTAACATGCGCATCTACTGGCT
117722_4941177_CD8B_5_1_2	GAGACAGCGCCAGGCACCGAGCAGTGACAGTCACCACGAGTTCCTGGCCCTCTGGGATTCCGCAAAAGGGACTATCCACGGTGAAGAGGTGGAACAGGAGAAGATAGCTGTGTTTCGGGA
117722_4941177_CD8B_5_1_3	TGCAAGCCGGTTCATTCTCAATCTCACAAGCGTGAAGCCGGAAGACAGTGGCATCTACTTCTGCATGATCGTCGGGAGCCCCGAGCTGACCTTCGGGAAGGGAACTCAGCTGAGTGTGG
117722_4941178_CD8B_6_1_1	CCCGGCCAGCTCCTCACCCACCCCAGCCGCGACTGTCTCCGCCGAGCCCCCGGGGCCAGGTGTCCCGGGCGCGCCACGATGCGGCCGCGGCTGTGGCTCCTCTTGGCCGCGCAGCTGACA
117722_4941179_TISP43_1_1_2	GGGAAGCAGGGGCAGAGCGCTCAGGCCAGGGCCGGCGGGGGCACTGCGCACTGGCCGCCTCCCTCCTCTGGCCAATCCTCCTGCCGCTGCGCGTCTAGTCCACCTCGTCCCTCTCTGCAG
117722_4941180_TISP43_2_1_1	CCCACAGAGCACAGCAAGCAGATGACAGTGAATAAGATCATGGTGCACGCTGACTATAACGAGTTGCACCGCATGGGGAGTGACATCACCCTGCTGCAGCTGCACCGTCATGTGGAATTC
117722_4941180_TISP43_2_1_2	TGCACCGTCATGTGGAATTCAGCTCCCACATCCTCCCCGCCTGCCTTCCGGAACCAACCACGTGGCTGGCCCCTGACAGCTCCTGCTGGATATCTGGTTGGGGAATGGTCACCGAGGATG
117722_4941181_TISP43_3_1_1	TCTTCCTGCCTGAGCCCTTCCAACTTCAGGAGGCAGAGGTCGGTGTCATGGACAACACTGTCTGCGGATCCTTTTTCCAGCCCCAGTACCCCGGCCAGCCAAGCAGCAGTGACTACACCA
117722_4941181_TISP43_3_1_2	ACTGTCTGCGGATCCTTTTTCCAGCCCCAGTACCCCGGCCAGCCAAGCAGCAGTGACTACACCATCCACGAGGACATGCTGTGCGCTGGGGACCTCATAACAGGAAAGGCCATTTGCCGA
117722_4941182_TISP43_4_1_1	GCATGTTCCTACGTGAAGCATGGAGTTACGCAATGGCCTGCCTGTCCATGAAGTTCCTCTGGCCTCCTCCGATTCTGTGGCTGCAAATCCACACCTAGGAGCTCCGCAGGCCTGCTGGAG
117722_4941182_TISP43_4_1_2	CCGCAGGCCTGCTGGAGCACAGCGCCTGTAGGTTTCTGCGCCTGGAACCCACCTCAGGACCACAAGCCGCATTCAGTCTCTTTTTATAGATCTGGAACCCGAAGCCCAGCGTGGTTAGGA
117722_4941182_TISP43_4_1_3	GCCCAGCGTGGTTAGGAACTTGTCTAAGGTCACTTGGTAGTAAATACTGGAACAGGGATTCAAACCCACATCTCCAGAGAGAGCTCAGAAGCCTTGTGCTTTCCATGAGTGCAGCTGTTT
117722_4941182_TISP43_4_1_4	CATGAGTGCAGCTGTTTCCAGAGGCCTCCGGCCCTGTCTCACCTTCCCAGACTGCCTTGAGAGGCTCTAGCTGGCCTGTCTCTAGTGTGGCCAGATTCTATCTGGTCAGTGGCAAGGGAG
117722_4941182_TISP43_4_1_5	GGTCAGTGGCAAGGGAGGACCCCAGGCCACAATACTGACATCAGGGAACAGAACAGATCTGCAGGGCCAGTGAGTGGTGCTACGGAAAGGCTGGGAGTGGCCCCTGCGTGGTTTTCCCTA
117722_4941182_TISP43_4_1_6	CTGCGTGGTTTTCCCTAGACCCATCGTCAGGGGCTCCAGGCCTCCATGTGTTGTGCTGCACGGGCTACTGGCTCCCTCTCCAAAATCGACCCTGGGTGAGCTGTGGAGGCGAGAAGGCAG
117722_4941182_TISP43_4_1_7	TGGAGGCGAGAAGGCAGTGTGCATTTCAGAAACTAACCAAAATCAGTGAGAAAATCTTGGAGAAACTGAAGTTACCCTGGGCGGCTGTAGCTGGGAATGGAGGATGGGGCAGCCAGGAGC
117722_4941183_CFC1_1_1_1	ACCCGAAAGACTTCCTGGCCTCCCACGCTCACGGGCCGAGCGCCGGGGGCGCGCCCAGCCTGCTACTCTTGCTGCCCTGCGCACTCCTGCACCGCCTCCTGCGCCCGGATGCGCCCGCGC
117722_4941183_CFC1_1_1_2	GCACCGCCTCCTGCGCCCGGATGCGCCCGCGCACCCTCGGTCCCTGGTCCCTTCCGTCCTCCAGCGGGAGCGGCGCCCCTGCGGAAGGCCGGGACTTGGGCATCGCCTTTAATTTTCTAT
117722_4941183_CFC1_1_1_3	CCGGGACTTGGGCATCGCCTTTAATTTTCTATGTTGTAAATAATAGATGTGTTTAGTTTACCGTAAGCTGAAGCACTGGGTGAATATTTTTATTGGGTAATAAATATTTTCATGAAAGCG
117722_4941184_CFC1_2-3_1_1	GTGCGTCCGCGCGGCCGCGCTGCTGCAGGAACGGCGGTACCTGCGTGCTGGGCAGCTTCTGCGTGTGCCCGGCCCACTTCACCGGCCGCTACTGCGAGCATGACCAGAGGCGCAGTGAAT
117722_4941184_CFC1_2-3_1_2	AGAGGCGCAGTGAATGCGGCGCCCTGGAGCACGGAGCCTGGACCCTCCGCGCCTGCCACCTCTGCAGGTGCATCTTCGGGGCCCTGCACTGCCTCCCCCTCCAGACGCCTGACCGCTGTG
117722_4941185_CFC1_4_1_1	GCTATCAAAGAGAGAAACATAACGGCGGTAGAGAGGAAGTCACCAAGGTTGCCACTCAGAAGCACCGACAGTCACCGCTCAACTGGACCTCCAGTCATTTCGGAGAGGTGACTGGGAGCG
117722_4941185_CFC1_4_1_2	CTCAGAAGCACCGACAGTCACCGCTCAACTGGACCTCCAGTCATTTCGGAGAGGTGACTGGGAGCGCCGAGGGCTGGGGGCCGGAGGAGCCGCTCCCCTACTCCCGGGCTTTCGGAGAGG
117722_4941186_CFC1_6_1_1	GTGAGAAAATGGCTCGTCACCTTGGATACCAATGTTTTACATCAGGGATTGGTCACTCCTGCTGCTGTCAGCACTGTAAACACTGCTGGGGGGAGTCAGCCCAAGTCCCCACCCCCCAGC
117722_4941186_CFC1_6_1_2	GCCCAAGTCCCCACCCCCCAGCCAGGTCTCATAGAGGGAATTGTTCTTCAGGCTCGGAGGGGCCTGCCTGTCACTGCGCCCCCGACCCTAGCTCAGGGACTGCAGAACTCAAGATACCAT
117722_4941186_CFC1_6_1_3	ACTGCAGAACTCAAGATACCATCCCGTTTCTCCTGGCTGAGGAAGGGAAGGGAACATCCACATCTTCTGTACTCGTCCATTCTGTGTCCCCGGGGCCTGGAGTAAAGACACCTTCAAATG
117722_4941186_CFC1_6_1_4	GGAGTAAAGACACCTTCAAATGCAGAGACTCTTCAGATTCAGCTTTCCTGGAAACTGATCTTCAATGCACTAAGAGAAGGAGACTCTCAAACCAAAAATGACCTGGAGGCACCATGTCAG
117722_4941187_GTF2I_1-21_1_1	ATGATGATTATTCTCCACCGTCTAAGAGACCAAAGGCCAATGAGCTACCGCAGCCACCAGTCCCGGAACCCGCCAATGCTGGGAAGCGGAAAGTGAGGGAGTTCAACTTCGAGAAATGGA
117722_4941187_GTF2I_1-21_1_2	ATGGAATGCTCGCATCACTGATCTACGTAAACAAGTTGAAGAATTGTTTGAAAGGAAATATGCTCAAGCCATAAAAGCCAAAGGTCCGGTGACGATCCCGTACCCTCTTTTCCAGTCTCA
117722_4941187_GTF2I_1-21_1_3	TCTCATGTTGAAGATCTTTATGTAGAAGGACTTCCTGAAGGAATTCCTTTTAGAAGGCCATCTACTTACGGAATTCCTCGCCTGGAGAGGATATTACTTGCAAAGGAAAGGATTCGTTTT
117722_4941187_GTF2I_1-21_1_4	GTTTTGTGATTAAGAAACATGAGCTTCTGAATTCAACACGTGAAGATTTACAGCTTGATAAGCCAGCTTCAGGAGTAAAGGAAGAATGGTATGCCAGAATCACTAAATTAAGAAAGATGG
117722_4941187_GTF2I_1-21_1_5	GATGGTGGATCAGCTTTTCTGCAAAAAATTTGCGGAAGCCTTGGGGAGCACTGAAGCCAAGGCTGTACCGTACCAAAAATTTGAGGCACACCCGAATGATCTGTACGTGGAAGGACTGCC
117722_4941187_GTF2I_1-21_1_6	CTGCCAGAAAACATTCCTTTCCGAAGTCCCTCATGGTATGGAATCCCAAGGCTGGAAAAAATCATTCAAGTGGGCAATCGAATTAAATTTGTTATTAAAAGACCAGAACTTCTGACTCAC
117722_4941187_GTF2I_1-21_1_7	CTCACAGTACCACTGAAGTTACTCAGCCAAGAACGAATACACCAGTCAAAGAAGATTGGAATGTCAGAATTACCAAGCTACGGAAGCAAGTGGAAGAGATTTTTAATTTGAAATTTGCTC
117722_4941187_GTF2I_1-21_1_8	TGCTCAAGCTCTTGGACTCACCGAGGCAGTAAAAGTACCATATCCTGTGTTTGAATCAAACCCGGAGTTCTTGTATGTGGAAGGCTTGCCAGAGGGGATTCCCTTCCGAAGCCCTACCTG
117722_4941187_GTF2I_1-21_1_9	ACCTGGTTTGGAATTCCACGACTTGAAAGGATCGTCCGCGGGAGTAATAAAATCAAGTTCGTTGTTAAAAAACCTGAACTAGTTATTTCCTACTTGCCTCCTGGGATGGCTAGTAAAATA
117722_4941187_GTF2I_1-21_1_10	AAATAAACACTAAAGCTTTGCAGTCCCCCAAAAGACCACGAAGTCCTGGGAGTAATTCAAAGGTTCCTGAAATTGAGGTCACCGTGGAAGGCCCTAATAACAACAATCCTCAAACCTCAG
117722_4941187_GTF2I_1-21_1_11	CTCAGCTGTTCGAACCCCGACCCAGACTAACGGTTCTAACGTTCCCTTCAAGCCACGAGGGAGAGAGTTTTCCTTTGAGGCCTGGAATGCCAAAATCACGGACCTAAAACAGAAAGTTGA
117722_4941187_GTF2I_1-21_1_12	GTTGAAAATCTCTTCAATGAGAAATGTGGGGAAGCTCTTGGCCTTAAACAAGCTGTGAAGGTGCCGTTCGCGTTATTTGAGTCTTTCCCGGAAGACTTTTATGTGGAAGGCTTACCTGAG
117722_4941187_GTF2I_1-21_1_13	CTGAGGGTGTGCCATTCCGAAGACCATCGACTTTTGGCATTCCGAGGCTGGAGAAGATACTCAGAAACAAAGCCAAAATTAAGTTCATCATTAAAAAGCCCGAAATGTTTGAGACGGCGA
117722_4941187_GTF2I_1-21_1_14	GGCGATTAAGGAGAGCACCTCCTCTAAGAGCCCTCCCAGAAAAATAAATTCATCACCCAATGTTAATACTACTGCATCAGGTGTTGAAGACCTTAACATCATTCAGGTGACAATTCCAGA
117722_4941187_GTF2I_1-21_1_15	CCAGATGATGATAATGAAAGACTCTCGAAAGTTGAAAAAGCTAGACAGCTAAGAGAACAAGTGAATGACCTCTTTAGTCGGAAATTTGGTGAAGCTATTGGTATGGGTTTTCCTGTGAAA
117722_4941187_GTF2I_1-21_1_16	TGAAAGTTCCCTACAGGAAAATCACAATTAACCCTGGCTGTGTGGTAGTTGATGGCATGCCCCCGGGGGTGTCCTTCAAAGCCCCCAGCTACCTGGAAATCAGCTCCATGAGAAGGATCT
117722_4941187_GTF2I_1-21_1_17	GATCTTAGACTCTGCCGAGTTTATCAAATTCACGGTCATTAGACCATTTCCAGGACTTGTGATTAATAACCAGCTGGTTGATCAGAGTGAGTCAGAAGGCCCCGTGATACAAGAATCAGC
117722_4941187_GTF2I_1-21_1_18	TCAGCTGAACCAAGCCAGTTGGAAGTTCCAGCCACAGAAGAAATAAAAGAGACTGATGGAAGCTCTCAGATCAAGCAAGAACCAGACCCCACGTGGTAGACCTCTTCCCTCCTAGG
117722_4941188_NCF1_1-11_1_1	ATGGGGGACACCTTCATCCGTCACATCGCCCTGCTGGGCTTTGAGAAGCGCTTCGTACCCAGCCAGCACTATGTGTACATGTTCCTGGTGAAATGGCAGGACCTGTCGGAGAAGGTGGTC
117722_4941188_NCF1_1-11_1_2	GTCTACCGGCGCTTCACCGAGATCTACGAGTTCCATAAAACCTTAAAAGAAATGTTCCCTATTGAGGCAGGGGCGATCAATCCAGAGAACAGGATCATCCCCCACCTCCCAGCTCCCAAG
117722_4941188_NCF1_1-11_1_3	AAGTGGTTTGACGGGCAGCGGGCCGCCGAGAACCGCCAGGGCACACTTACCGAGTACTGCAGCACGCTCATGAGCCTGCCCACCAAGATCTCCCGCTGTCCCCACCTCCTCGACTTCTTC
117722_4941188_NCF1_1-11_1_4	TTCAAGGTGCGCCCTGATGACCTCAAGCTCCCCACGGACAACCAGACAAAAAAGCCAGAGACATACTTGATGCCCAAAGATGGCAAGAGTACCGCGACAGACATCACCGGCCCCATCATC
117722_4941188_NCF1_1-11_1_5	ATCCTGCAGACGTACCGCGCCATTGCCAACTACGAGAAGACCTCGGGCTCCGAGATGGCTCTGTCCACGGGGGACGTGGTGGAGGTCGTAGAGAAGAGCGAGAGCGGTTGGTGGTTCTGT
117722_4941188_NCF1_1-11_1_6	TGTCAGATGAAAGCAAAGCGAGGCTGGATCCCAGCGTCCTTCCTCGAGCCCCTGGACAGTCCTGACGAGACGGAAGACCCTGAGCCCAACTATGCAGGTGAGCCATACGTCGCCATCAAG
117722_4941188_NCF1_1-11_1_7	AAGGCCTACACTGCTGTGGAGGGGGACGAGGTGTCCCTGCTCGAGGGTGAAGCTGTTGAGGTCATTCACAAGCTCCTGGACGGCTGGTGGGTCATCAGGAAAGACGACGTCACAGGCTAC
117722_4941188_NCF1_1-11_1_8	TACTTCCCGTCCATGTACCTGCAAAAGTCAGGGCAAGACGTGTCCCAGGCCCAACGCCAGATCAAGCGGGGGGCGCCGCCCCGCAGGTCGTCCATCCGCAACGCGCACAGCATCCACCAG
117722_4941188_NCF1_1-11_1_9	CAGCGGTCGCGGAAGCGCCTCAGCCAGGACGCCTATCGCCGCAACAGCGTCCGTTTTCTGCAGCAGCGACGCCGCCAGGCGCGGCCGGGACCGCAGAGCCCCGGGAGCCCGCTCGAGGAG
117722_4941188_NCF1_1-11_1_10	GAGGAGCGGCAGACGCAGCGCTCTAAACCGCAGCCGGCGGTGCCCCCGCGGCCGAGCGCCGACCTCATCCTGAACCGCTGCAGCGAGAGCACCAAGCGGAAGCTGGCGTCTGCCGTCTGA
117722_4941189_GTF2IRD2_1-13_1_1	TGTAAAGAACTGGCCAAGTCCAAGGCAGAAGTGGCCTGCATCGCAGTGTACGAAACAGACGTGTTTGTCGTCGGAACCGAGAGAGGATGCGCTTTTGTTAATGCCAGGACGGATTTTCAG
117722_4941189_GTF2IRD2_1-13_1_2	TTTCAGAAAGATTTTGCAAAATACTGCGTTGCAGAGGGACTGTGTGAGGTGAAACCTCCCTGCCCTGTGAACGGGATGCAGGTCCACTCAGGCGAAACGGAAATACTCAGGAAGGCAGTG
117722_4941189_GTF2IRD2_1-13_1_3	GCAGTGGAGGACTATTTCTGCTTTTGTTATGGTAAAGCCTTAGGGACAACAGTGATGGTGCCTGTTCCCTATGAGAAGATGCTGCGAGACCAGTCGGCTGTGGTAGTGCAGGGGCTTCCG
117722_4941189_GTF2IRD2_1-13_1_4	CTTCCGGAAGGCGTTGCCTTTCAACACCCTGAGAATTACGACCTTGCAACCCTGAAATGGATTTTGGAGAACAAAGCAGGGATTTCATTCATCATAAATAGACCCTTCCTAGGACCAGAG
117722_4941189_GTF2IRD2_1-13_1_5	CCAGAGAGTCAGCTGGGTGGCCCTGGGATGGTAACAGATGCGGAGAGATCCATAGTATCACCAAGTGAAAGCTGCGGCCCCATCAATGTGAAAACTGAACCCATGGAAGATTCTGGCATT
117722_4941189_GTF2IRD2_1-13_1_6	GGCATTTCACTGAAAGCAGAAGCTGTCTCAGTCAAGAAAGAATCAGAAGATCCTAATTACTATCAATATAATATGCAAGGAAGCCACCCTTCTTCCACAAGCAATGAAGTAATAGAAATG
117722_4941189_GTF2IRD2_1-13_1_7	GAAATGGAATTACCAATGGAAGATTCCACTCCGCTGGTCCCTTCAGAAGAACCAAATGAGGACCCTGAAGCCGAGGTGAAAATCGAAGGAAACACAAATTCATCCAGTGTTACAAATTCT
117722_4941189_GTF2IRD2_1-13_1_8	AATTCTGCAGCAGGTGTTGAAGATCTTAACATCGTTCAAGTGACTGTTCCAGATAATGAGAAGGAAAGATTATCAAGCATTGAAAAGATTAAACAGCTAAGAGAACAAGTTAATGACCTC
117722_4941189_GTF2IRD2_1-13_1_9	GACCTCTTTAGCCGAAAATTTGGTGAAGCAATTGGCGTGGATTTCCCTGTGAAAGTTCCCTACAGGAAGATCACATTCAACCCTGGCTGTGTGGTGATTGATGGCATGCCCCCGGGGGTG
117722_4941189_GTF2IRD2_1-13_1_10	GGGGTGGTATTCAAGGCCCCCGGCTATCTGGAAATCAGTTCCATGAGGAGGATCTTGGAGGCAGCTGAGTTTATCAAATTCACAGTCATCAGGCCGCTTCCAGGGCTTGAGCTCAGTAAT
117722_4941190_GPRIN2_1_1_1	ATGAGCTCCAGCCGCCCCGAGCCGGGTCCCTGGGCACCCCTGAGCCCCCGCCTTCAGCCCCTGTCCCAGAGCTCTTCCAGCCTGCTGGGTGAAGGCCGGGAACAGAGGCCAGAGCTCCGC
117722_4941190_GPRIN2_1_1_2	CTCCGCAAGACTGCCAGCAGCACCGTGTGGCAGGCCCAGCTGGGCGAGGCCAGCACCAGACCCCAGGCCCCGGAGGAAGAGGGGAACCCGCCTGAGAGCATGAAGCCAGCACGGGCCTCT
117722_4941190_GPRIN2_1_1_3	GCCTCTGGCCCCAAGGCGCGACCCAGTGCTGGAGGCCACTGGTGGAGCAGCACTGTGGGCAATGTGTCCACCATGGGCGGCAGTGACCTGTGTCGCCTGCGGGCCCCTAGTGCTGCTGCT
117722_4941190_GPRIN2_1_1_4	GCTGCTATGCAGAGGAGCCATTCAGACCTGGTCCGTAGCACCCAGATGCGGGGACACAGTGGTGCTCGGAAGGCCAGTCTCAGCTGCTCAGCCCTTGGCAGCAGCCCTGTCCACAGGGCT
117722_4941190_GPRIN2_1_1_5	AGGGCTCAGCTGCAGCCAGGTGGTACTTCTGGCCAGGGTGGCCAGGCCCCTGCAGGCCTGGAAAGGGACCTGGCTCCTGAGGATGAGACTTCTAACTCAGCCTGGATGCTGGGGGCGAGT
117722_4941190_GPRIN2_1_1_6	GCGAGTCAGTTGTCAGTGCCACCACTAGACCTGGGGGACACAACTGCCCACAGCAGCAGTGCCCAGGCTGAGCCCAAAGCTGCTGAACAGCTGGCTACCACCACCTGCCATGCTCTGCCC
117722_4941190_GPRIN2_1_1_7	CTGCCCCCAGCTGCTCTACTCTGTGGCATGAGGGAGGTGAGGGCTGGTGGCTGCTGCCATGCCCTACCTGCCACAGGGATCCTGGCCTTTCCCAAACTAGTGGCGTCAGTGAGCGAGTCT
117722_4941190_GPRIN2_1_1_8	GAGTCTGGGCTGCAGGCTCAGCATGGGGTGAAGATCCACTGTAGGTTGTCTGGGGGGCTCCCTGGGCATTCCCATTGCTGTGCCCACCTTTGGGGTCCCGCTGGGTTAGTCCCAGAGCCT
117722_4941190_GPRIN2_1_1_9	GAGCCTGGCTCTAGGACCAAAGATGTGTGGACCATGACCTCAGCCAATGACTTGGCCCCTGCAGAGGCATCCCCGCTGTCAGCCCAGGATGCTGGTGTGCAGGCGGCCCCAGTGGCGGCC
117722_4941190_GPRIN2_1_1_10	GCGGCCTGCAAGGCTGTGGCCACCAGTCCGTCCCTGGAAGCGCCTGCAGCCCTGCATGTGTTCCCAGAGGTAACTCTGGGGTCCAGCCTGGAGGAGGTGCCGTCCCCTGTGCGGGATGTG
117722_4941190_GPRIN2_1_1_11	GATGTGCGATGGGATGCTGAGGGCATGACATGGGAGGTGTACGGAGCTGCGGTGGACCTGGAGGTGCTCGGTGTGGCCATCCAGAAGCACCTGGAGATGCAGTTTGAGCAGCTGCAGCGG
117722_4941190_GPRIN2_1_1_12	CAGCGGGCGCCCGCCAGCGAGGACAGCCTGTCTGTGGAGGGCCGGAGGGGGCCACTGCGGGCTGTCATGCAGTCCCTGCGGCGCCCCAGCTGCTGCGGCTGCTCCGGCGCGGCCCCCGAG
117722_4941191_PTPN20_1_1_1	GTGAACAAAAATTGTTTGCTGGCCCCCAGGATACTAACTAGACCTTTGGCCTGACTCACAGGACACTAAGGCTCCTTTTCTGAAGAAGCCTTTTACCAGTCTCATTTAGGGGATGGGAAC
117722_4941191_PTPN20_1_1_2	CTAGACCTTTGGCCTGACTCACAGGACACTAAGGCTCCTTTTCTGAAGAAGCCTTTTACCAGTCTCATTTAGGGGATGGGAACAACATGTCTTCACCTAGGGACTTTAGAGCAGAGCCTG
117722_4941192_PTPN20_3,4_1_1	GTTTTTGAAAATAAAGTTAATTCAGAGAAGGTAAAACTTTCTCTTCGGAATTTCCCACATAATGATTATGAGGATGTTTTTGAAGAGCCTTCAGAAAGTGGCAGTGATCCCAGCATGTGG
117722_4941192_PTPN20_3,4_1_2	CAGAAAGTGGCAGTGATCCCAGCATGTGGACAGCCAGAGGCCCCTTCAGAAGAGACAGGTGGAGCAGTGAGGATGAGGAGGCTGCAGGGCCATCACAGGCTCTCTCCCCTCTACTTTCTG
117722_4941193_PTPN20_5_1_1	ATACGCGCAAAATTGTTTCTGAAGGAGAACTAGATCAGTTGGCTCAGATTCGGCCATTAATATTCAATTTTCATGAGCAGACAGCCATCAAGGATTGTTTGAAAATCCTTGAGGAAAAAA
117722_4941193_PTPN20_5_1_2	GATCAGTTGGCTCAGATTCGGCCATTAATATTCAATTTTCATGAGCAGACAGCCATCAAGGATTGTTTGAAAATCCTTGAGGAAAAAACAGCAGCGTATGATATCATGCAGGAATTTATG
117722_4941194_PTPN20_7_1_1	ATGATTCAACACGCGTTCCTCTTGGAAAAAGCAAGGACTACATCAATGCTAGTTATATTAGAATAGTCAATTGTGGAGAAGAGTATTTTTATATCGCTACTCAAGGACCACTGCTGAGCA
117722_4941194_PTPN20_7_1_2	CACTGCTGAGCACCATAGATGACTTTTGGCAAATGGTGTTGGAAAATAATTCAAATGTTATTGCCATGATAACCAGAGAGATAGAAGGTGGAATTATCAAATGCTACCATTACTGGCCCA
117722_4941194_PTPN20_7_1_3	ATTACTGGCCCATTTCTCTGAAGAAGCCATTGGAATTGAAACACTTCCGTGTATTCCTGGAGAACTACCAGATACTTCAATATTTCATCATTCGAATGTTTCAAGTTGTGGAGAAGTCC
117722_4941195_PTPN20_8_1_1	ACGGGAACTAGTCACTCTGTAAAACAGTTGCAGTTCACCAAGTGGCCAGACCATGGCACTCCTGCCTCAGCAGATAGCTTCATAAAATATATTCGTTATGCAAGGAAGAGCCACCTTACA
117722_4941195_PTPN20_8_1_2	TATGCAAGGAAGAGCCACCTTACAGGACCCATGGTTGTTCACTGCAGTGCCGGCATAGGCCGGACAGGGGTGTTCCTATGTGTGGATGTCGTGTTCTGTGCCATCGTAAAGAACTGTTCA
117722_4941196_NPY4R_1_1_1	ATGAACACCTCTCACCTCCTGGCCTTGCTGCTCCCAAAATCTCCACAAGGTGAAAACAGAAGCAAACCCCTGGGCACCCCATACAACTTCTCTGAACATTGCCAGGATTCCGTGGACGTG
117722_4941196_NPY4R_1_1_2	TGGACGTGATGGTCTTCATTGTCACTTCCTACAGCATTGAGACTGTCGTGGGGGTCCTGGGTAACCTCTGCCTGATGTGTGTAACTGTGAGGCAGAAGGAGAAAGCCAACGTGACCAACC
117722_4941196_NPY4R_1_1_3	GACCAACCTGCTTATCGCCAACCTGGCCTTCTCTGACTTCCTCATGTGCCTCCTCTGCCAGCCGCTGACCGCCGTCTACACCATCATGGACTACTGGATCTTTGGAGAGACCCTCTGCAA
117722_4941196_NPY4R_1_1_4	CTCTGCAAGATGTCGGCCTTCATCCAGTGCATGTCGGTGACGGTCTCCATCCTCTCGCTCGTCCTCGTGGCCCTGGAGAGGCATCAGCTCATCATCAACCCAACAGGCTGGAAGCCCAGC
117722_4941196_NPY4R_1_1_5	AGCCCAGCATCTCACAGGCCTACCTGGGGATTGTGCTCATCTGGGTCATTGCCTGTGTCCTCTCCCTGCCCTTCCTGGCCAACAGCATCCTGGAGAATGTCTTCCACAAGAACCACTCCA
117722_4941196_NPY4R_1_1_6	CCACTCCAAGGCTCTGGAGTTCCTGGCGGATAAGGTGGTCTGTACCGAGTCCTGGCCACTGGCTCACCACCGCACCATCTACACCACCTTCCTGCTCCTCTTCCAGTACTGCCTCCCACT
117722_4941196_NPY4R_1_1_7	CTCCCACTGGGCTTCATCTTGGTCTGTTATGCACGCATCTACCGGCGCCTGCAGAGGCAGGGGCGCGTGTTTCACAAGGGCACCTACAGCTTGCGAGCTGGGCACATGAAGCAGGTCAAT
117722_4941196_NPY4R_1_1_8	AGGTCAATGTGGTGCTGGTGGTGATGGTGGTGGCCTTTGCCGTGCTCTGGCTGCCTCTGCATGTGTTCAACAGCCTGGAAGACTGGCACCATGAGGCCATCCCCATCTGCCATGGGAACC
117722_4941196_NPY4R_1_1_9	TGGGAACCTCATCTTCTTAGTGTGCCACTTGCTTGCCATGGCCTCCACCTGTGTCAACCCATTCATCTATGGCTTTCTCAACACCAACTTCAAGAAGGAGATCAAGGCCCTGGTGCTGAC
117722_4941196_NPY4R_1_1_10	GTGCTGACTTGCCAGCAGAGCGCCCCCCTGGAGGAGTCAGAGCATCTGCCCCTGTCCACAGTACATACGGAAGTCTCCAAAGGGTCCCTGAGGCTAAGTGGCAGGTCCAATCCCATTTAA
117722_4941197_FRMPD2_1_1_2	TATTCCTTCTCATCTCCTCTAACCAGACTTTCGACAGATATTTTCTGAGCACCTTCTCTGCATGTCTGCAGTGCTGTGTAAAATGCCCTACCTTTGCATGGACTATTCTTTCTAATCAAG
117722_4941198_FRMPD2_2_1_1	ACACCTGAACTCTCAGCTGACAAAGAATTCACCAGGGCAACATGTACTGACTCATGTACCAGCCCCATCCTGGATCAAGAGGACAGCTGGAGGGACAGTGCCTCCCCAGATGCAGGGGAA
117722_4941198_FRMPD2_2_1_2	CAGGGGAAGGCCTGGGTCTCAGGCCAGAGTCTTCCCAAAAGGCCATCAGAGAGGCACAATGGGGCCAAAACAGAGAGAGACCTTGGGCCAGTTCCTTGACACATTCTCCTGAGTCCCACC
117722_4941198_FRMPD2_2_1_3	GTCCCACCCTCATTTATGCAAACTTCACCAAGAAAGGGATGAATCAACATTGGCGACCTCTTTGGAAAAGGATGTGAGGCAAAACTGCTATTCAGTTTGTGATATCATGAGACTTGGAAG
117722_4941199_FRMPD2_4_1_1	GTCCTAAGTTTGAAGTCAAACTAAAAAAGAATGCCAATGGTTTGGGATTCAGTTTCGTGCAGATGGAGAAAGAGAGCTGCAGCCATCTCAAAAGTGATCTTGTGAGGATTAAGAGGCTCT
117722_4941199_FRMPD2_4_1_2	GATCTTGTGAGGATTAAGAGGCTCTTTCCGGGGCAGCCAGCTGAGGAGAATGGGGCCATTGCAGCTGGTGACATTATCCTGGCCGTGAATGGAAGGTCCACGGAAGGCCTCATCTTCCAG
117722_4941200_FRMPD2_5,6_1_1	GTGACCGACTCCTGCAGGTGGATGGAGTGATTCTGTGCGGCCTCACCCACAAGCAGGCTGTGCAGTGCCTGACGGGTCCTGGGCAGGTTGCAAGACTGGTCTTAGAGAGAAGAGTCCCCA
117722_4941200_FRMPD2_5,6_1_2	TCCCCAGGAGTACACAGCAGTGTCCTTCTGCTAATGACAGCATGGGAGATGAACGCACGGCTGTTTCCTTGGTAACAGCCTTGCCTGGCAGGCCTTCGAGCTGTGTCTCAGTGACAGATG
117722_4941201_FRMPD2_9_1_1	GTGTTGGTGGAAATAACCCAGATGAAGAAAAGAATAGCACAGCCAATTCTGGGGTCTCCTCTACAGACATCCTGAGCTTCGGGTACCAGGGAAGTTTGTTGTCACACACACAAGACCAGG
117722_4941201_FRMPD2_9_1_2	CAGGGAAGTTTGTTGTCACACACACAAGACCAGGACAGAAATACTGAAGAACTAGACATGGCTGGGGTGCAGAGCTTAGTGCCCAGGCTGAGACATCAGCTTTCCTTTCTGCCGTTAAAG
117722_4941202_NRXN2_2_1_1	GCCGCCAGCTGACCATCTTCAACAGCCAGGCTGCCATCAAGATCGGGGGCCGGGATCAGGGCCGCCCCTTCCAGGGCCAGGTGTCCGGCCTCTACTACAATGGGCTCAAGGTGCTGGCGC
117722_4941202_NRXN2_2_1_2	GCTCAAGGTGCTGGCGCTGGCCGCCGAGAGCGACCCCAATGTGCGGACTGAGGGTCACCTGCGCCTGGTGGGGGAGGGGCCGTCCGTGCTGCTCAGTGCGGAGACCACGGCCACCACCCT
117722_4941202_NRXN2_2_1_3	ACCACGGCCACCACCCTGCTGGCTGACATGGCCACCACCATCATGGAGACTACCACCACCATGGCCACTACCACCACGCGCCGGGGCCGCTCCCCCACACTGAGGGACAGCACCACCCAG
117722_4941203_NRXN2_3_1_1	GACCAGGGCACCGTGGGGGTGATCTTTAACGTGGGCACGGACGACATTACCATCGACGAGCCCAACGCCATAGTAAGCGACGGCAAATACCACGTGGTGCGCTTCACTCGAAGCGGCGGC
117722_4941203_NRXN2_3_1_2	TCGACGAGCCCAACGCCATAGTAAGCGACGGCAAATACCACGTGGTGCGCTTCACTCGAAGCGGCGGCAACGCCACCCTGCAGGTGGACAGCTGGCCGGTCAACGAGCGGTACCCGGCAG
117722_4941204_NRXN2_4_1_1	CCGGGACCACATACATCTTTGGGAAGGGGGGAGCGCTCATCACCTACACGTGGCCCCCCAATGACAGGCCCAGCACGAGGATGGATCGCCTGGCCGTGGGCTTCAGCACCCACCAGCGGA
117722_4941204_NRXN2_4_1_2	GACAGGCCCAGCACGAGGATGGATCGCCTGGCCGTGGGCTTCAGCACCCACCAGCGGAGCGCTGTGCTGGTGCGGGTGGACAGCGCCTCCGGCCTTGGAGACTACCTGCAGCTGCACATC
117722_4941205_NRXN2_5_1_1	CCCCAGCACCACCTGCACTGAAGAGTCCTGTGCCAACCAGGGCGTCTGCTTGCAGCAGTGGGATGGCTTCACCTGCGACTGCACCATGACTTCCTATGGAGGCCCTGTCTGCAATGATC
117722_4941206_NRXN2_6_1_1	GGGAGTTGTACATTGGCGGTCTGAGCAAGAATATGTTCAGCAACCTGCCCAAGCTGGTGGCCTCCCGGGATGGCTTTCAGGGCTGCCTGGCCTCAGTGGACCTCAACGGACGTCTCCCAG
117722_4941206_NRXN2_6_1_2	TGGTGGCCTCCCGGGATGGCTTTCAGGGCTGCCTGGCCTCAGTGGACCTCAACGGACGTCTCCCAGACCTCATCGCCGACGCCCTGCACCGCATTGGGCAGGTGGAGAGGGGCTGTGATG
117722_4941207_NRXN2_7_1_1	GTACATCCACTACGTGTTTGACCTGGGGAATGGCCCGTCCTTGATGAAGGGGAACTCAGACAAACCAGTCAATGACAACCAGTGGCACAACGTGGTGGTGTCCAGGGACCCAGGCAACGT
117722_4941207_NRXN2_7_1_2	ATGACAACCAGTGGCACAACGTGGTGGTGTCCAGGGACCCAGGCAACGTGCACACGCTCAAGATTGACTCCCGCACTGTCACGCAGCACTCCAATGGCGCCCGAAACCTCGATCTCAAAG
117722_4941208_NRXN2_8_1_1	GACAGATGGCAGGAGCCCATATGCGGCTGGAGTTCCACAACATTGAGACGGGCATCATGACGGAGCGGCGGTTTATCTCCGTGGTGCCCTCCAACTTCATCGGGCATCTGAGTGGGCTCG
117722_4941208_NRXN2_8_1_2	CCTCCAACTTCATCGGGCATCTGAGTGGGCTCGTGTTCAATGGCCAGCCCTACATGGACCAGTGCAAGGATGGTGACATCACCTACTGTGAGCTCAATGCTCGCTTTGGCCTGCGTGCCA
117722_4941208_NRXN2_8_1_3	GTGAGCTCAATGCTCGCTTTGGCCTGCGTGCCATCGTGGCCGATCCCGTCACCTTCAAGAGTCGCAGCAGCTACCTGGCACTCGCCACGCTCCAAGCCTATGCTTCCATGCACCTCTTCT
117722_4941208_NRXN2_8_1_4	CGCTCCAAGCCTATGCTTCCATGCACCTCTTCTTCCAGTTCAAGACCACGGCCCCTGATGGGCTTCTTCTGTTCAACTCGGGCAACGGCAATGACTTCATTGTCATCGAGCTGGTCAAGG
117722_4941209_NRXN2_9_1_1	TAAAGGCCCCGAAACGCTGTTTGCGGGGCACAAGCTCAATGACAATGAGTGGCACACGGTGAGGGTGGTCCGGCGTGGCAAGAGCCTGCAGCTGTCTGTGGACAACGTGACTGTGGAGG
117722_4941210_NRXN2_10_1_1	AGGCCACGGTCCTGAGCTACGATGGCTCCATGTACATGAAGATCATGCTGCCTAACGCCATGCACACGGAGGCAGAGGATGTGTCCCTGCGTTTCATGTCCCAGCGGGCCTACGGACTCA
117722_4941210_NRXN2_10_1_2	CCCTGCGTTTCATGTCCCAGCGGGCCTACGGACTCATGATGGCCACCACTTCCAGGGAGTCTGCCGACACCCTACGCCTGGAGCTGGATGGGGGGCAGATGAAGCTCACTGTCAACCTCG
117722_4941211_NRXN2_11_1_1	GCTCCATCTCAGTGAATAGTCGCAGCACGCCGTTCTTGGCCACTGGAGACAGCGAGATTCTGGACCTGGAGAGTGAGCTGTACCTGGGCGGTCTCCCTGAGGGGGGCCGGGTGGACCTGC
117722_4941211_NRXN2_11_1_2	GGTCTCCCTGAGGGGGGCCGGGTGGACCTGCCCCTGCCCCCAGAGGTGTGGACAGCAGCACTCCGGGCAGGCTACGTGGGCTGTGTGCGGGACCTCTTCATAGATGGGCGTAGCCGAGAC
117722_4941211_NRXN2_11_1_3	GGACCTCTTCATAGATGGGCGTAGCCGAGACCTCCGGGGCCTGGCTGAGGCTCAGGGGGCTGTGGGCGTTGCCCCCTTTTGCTCCCGGGAGACGCTGAAGCAGTGTGCATCTGCCCCCTG
117722_4941211_NRXN2_11_1_4	AGACGCTGAAGCAGTGTGCATCTGCCCCCTGTCGCAATGGGGGCGTCTGTCGAGAAGGCTGGAACCGCTTCATCTGTGACTGCATCGGGACCGGCTTTCTTGGGCGGGTCTGTGAGAGAG
117722_4941212_NRXN2_12_1_1	GTGGTCTATAAGAACAATGACTTCAAATTGGAACTATCCCGCCTGGCAAAGGAAGGGGACCCCAAGATGAAGCTGCAGGGGGACTTGTCATTCCGCTGTGAGGATGTGGCTGCCCTGGAC
117722_4941212_NRXN2_12_1_2	TGGCTGCCCTGGACCCTGTGACCTTTGAGAGTCCCGAGGCCTTTGTGGCGCTGCCCCGCTGGAGCGCTAAGCGCACTGGCTCCATCTCCCTAGACTTCCGCACCACCGAGCCCAATGGGC
117722_4941212_NRXN2_12_1_3	CGAGCCCAATGGGCTGCTGCTCTTCAGCCAGGGCCGGCGGGCTGGGGGTGGAGCTGGCAGCCACAGCTCTGCTCAGCGGGCCGACTACTTTGCCATGGAGCTATTGGACGGCCACCTCTA
117722_4941212_NRXN2_12_1_4	GACGGCCACCTCTATCTTCTGCTGGACATGGGATCTGGGGGCATCAAGCTGCGGGCATCCAGCCGCAAGGTCAATGATGGCGAGTGGTGTCACGTGGACTTCCAGAGGGATGGGCGAAAA
117722_4941213_NRXN2_13_1_1	GTGACCATCTCGGTGGACGGGATCCTGACCACCACAGGCTACACGCAGGAGGATTACACCATGCTGGGCTCTGATGACTTCTTCTACATTGGGGGCAGCCCCAACACAGCTGACCTGCCG
117722_4941213_NRXN2_13_1_2	ACGCAGGAGGATTACACCATGCTGGGCTCTGATGACTTCTTCTACATTGGGGGCAGCCCCAACACAGCTGACCTGCCGGGCTCGCCCGTCAGCAACAACTTCATGGGCTGCCTCAAGGAC
117722_4941214_NRXN2_14_1_1	GCAAGGAGGAGTTTGTGGCGACCTTCAAAGGCAATGAGTTCTTCTGCTACGACCTGTCACACAACCCCATCCAGAGCAGCACTGATGAGATCACACTGGCCTTCCGCACCCTGCAACGCA
117722_4941214_NRXN2_14_1_2	CACACTGGCCTTCCGCACCCTGCAACGCAACGGCCTGATGCTGCATACAGGCAAGTCGGCCGACTACGTCAACCTGTCCCTCAAGTCTGGGGCTGTCTGGCTGGTCATCAACCTAGGCTC
117722_4941214_NRXN2_14_1_3	GCTGTCTGGCTGGTCATCAACCTAGGCTCAGGTGCCTTCGAGGCCCTTGTGGAACCCGTCAATGGCAAGTTCAACGACAACGCCTGGCACGACGTCCGGGTCACCCGAAACCTGCGCCAG
117722_4941215_CHD8_2_1_1	CTGGAGGTGGAGTGCATGGAAGAGCCTAATCACCTTGATGTGGACCTGGAGACCCGGATCCCTGTCATCAATAAGGTGGATGGTACTTTGCTGGTGGGTGAGGATGCCCCTCGCCGGGCT
117722_4941215_CHD8_2_1_2	CCTGTCATCAATAAGGTGGATGGTACTTTGCTGGTGGGTGAGGATGCCCCTCGCCGGGCTGAACTGGAGATGTGGTTACAGGGTCATCCAGAGTTTGCTGTTGATCCCCGATTTCTAGCG
117722_4941216_CHD8_4_1_1	GATCGTGTCCTGATAAACCGTATTGACCTCGTCTGCCAGGCTGTACTCTCAGGGAAGTGGCCTTCTAGCCGTAGGAGCCAGGAAATGGTAACAGGAGGAATTTTGGGGCCAGGCAACCAC
117722_4941216_CHD8_4_1_2	AGGAGGAATTTTGGGGCCAGGCAACCACTTGCTAGACAGTCCCTCATTGACTCCTGGAGAATATGGTGACTCTCCAGTCCCCACACCACGAAGTAGTAGTGCAGCTTCCATGGCAGAGGA
117722_4941216_CHD8_4_1_3	GTAGTAGTGCAGCTTCCATGGCAGAGGAGGAAGCATCTGCAGTCAGCACAGCGGCAGCCCAGTTCACCAAACTTCGCCGAGGCATGGATGAAAAGGAGTTTACAGTTCAAATCAAAGAT
117722_4941217_CHD8_5_1_1	CTGACCAGTCCCGCTCAAAGCTCTATGATGAAGAGAGTCTCCTGTCCCTCACTATGTCCCAAGATGGATTCCCAAATGAAGATGGAGAACAAATGACCCCTGAGCTTCTGCTACTGCAGG
117722_4941217_CHD8_5_1_2	GAAGAGAGTCTCCTGTCCCTCACTATGTCCCAAGATGGATTCCCAAATGAAGATGGAGAACAAATGACCCCTGAGCTTCTGCTACTGCAGGAAAGACAAAGAGCCTCTGAGTGGCCCAAG
117722_4941218_CHD8_6_1_1	ACCCCCCGACCCTAACCTGTTCATTGAGCCCATCACTGAGGAGAGAGCCTCACGGACTCTCTACCGTATAGAATTGCTTCGGCGCTTACGGGAACAAGTTTTATGCCACCCCCTTTTGGA
117722_4941218_CHD8_6_1_2	AGATCGGCTGGCATTGTGTCAGCCTCCTGGTCCTGAATTGCCCAAATGGTGGGAGCCTGTTCGGCATGATGGGGAGCTTCTAAGAGGGGCAGCCCGCCATGGGGTGAGCCAAACAGACTG
117722_4941218_CHD8_6_1_3	CAACATCATGCAGGACCCAGACTTCTCTTTTCTGGCTGCCCGTATGAATTATATGCAGAACCATCAAGCAGGAGCACCAGCTCCATCCTTGTCACGCTGCTCTACTCCACTGCTGCACCA
117722_4941218_CHD8_6_1_4	GCAGTATACCTCACGCACTGCCTCACCACTGCCCCTGCGCCCAGATGCTCCTGTTGAAAAGTCACCCGAGGAGACAGCTACCCAGGTCCCCAGTCTGGAGAGTCTGACTTTAAAGCTAGA
117722_4941218_CHD8_6_1_5	GCACGAGGTGGTGGCCAGGAGCCGACCAACCCCACAAGACTATGAGATGCGAGTATCCCCCTCTGATACTACCCCTCTGGTTTCCCGGAGTGTTCCACCAGTCAAACTGGAGGATGAGGA
117722_4941218_CHD8_6_1_6	TGATTCGGACTCTGAGCTGGACTTGAGCAAGCTGTCACCATCTTCTTCTTCTTCCTCATCCTCATCCAGCTCCAGCTCCAGCACTGATGAGAGTGAGGATGAGAAGGAAGAGAAGCTAA
117722_4941219_CHD8_7_1_1	ATGGACAAGGCGTGAACAAACTGATTTTTATCGAGTGGTGTCTACGTTTGGTGTGGAATATGACCCTGACACCATGCAGTTCCATTGGGATCGCTTCCGCACTTTTGCTCGACTAGACAA
117722_4941219_CHD8_7_1_2	ATCGCTTCCGCACTTTTGCTCGACTAGACAAAAAGACAGATGAAAGCCTTACCAAGTACTTCCATGGCTTTGTGGCCATGTGCCGCCAAGTATGCCGCCTTCCCCCAGCAGCTGGAGATG
117722_4941220_CHD8_8_1_1	CCCAGGTGACCCAACAGCCAGGCCATTTATTCTGGCCTCCGGGCTCTGCCCTAACAGCTAGGCTTCGGCGTCTAGTAACAGCGTATCAGCGCAGCTACAAGAGAGAACAAATGAAGATAG
117722_4941220_CHD8_8_1_2	GCGCAGCTACAAGAGAGAACAAATGAAGATAGAGGCTGCAGAACGTGGGGACCGGCGAAGGCGGCGTTGTGAAGCAGCCTTCAAGCTGAAAGAAATTGCACGGCGGGAGAAACAACAACG
117722_4941221_CHD8_11_1_1	GCTATGAGAAATATAATACCATGAGGGCAGACCCAGCCTTATGTTTCCTAGAAAAGGCTGGCCGACCAGATGACAAAGCAATTGCAGCAGAACATCGAGTGTTGGATAACTTCTCTGACA
117722_4941221_CHD8_11_1_2	ATATAATACCATGAGGGCAGACCCAGCCTTATGTTTCCTAGAAAAGGCTGGCCGACCAGATGACAAAGCAATTGCAGCAGAACATCGAGTGTTGGATAACTTCTCTGACATAGTAGAAGG
117722_4941222_CHD8_14_1_1	GTCTATCTATCCCTGTGCCTCGTGGACGCAAAGGAAAAAAAGTAAAGTCACAAAGCACTTTTGATATCCATAAGGCAGATTGGATCCGGAAATATAACCCTGACACTTTGTTCCAAGATG
117722_4941222_CHD8_14_1_2	AAAAGTAAAGTCACAAAGCACTTTTGATATCCATAAGGCAGATTGGATCCGGAAATATAACCCTGACACTTTGTTCCAAGATGAAAGTTATAAGAAGCACTTGAAACATCAGTGTAACAA
117722_4941223_CHD8_15_1_1	TTGGGGACGATGGCGAGATATTTTATCTCATGGACGCTTCAAGCGACGTATGACTGAACGAGATGTGGAGACCATTTGTCGGGCCATTCTCGTGTACTGTCTTCTACACTACCGTGGGGA
117722_4941223_CHD8_15_1_2	GGGCCATTCTCGTGTACTGTCTTCTACACTACCGTGGGGATGAAAATATTAAAGGCTTCATCTGGGACTTGATTAGCCCAGCTGAAAATGGCAAGACAAAAGAATTGCAGAATCATTCAG
117722_4941224_CHD8_16_1_1	AATAATTTGGTAATTGACACACCTAGAGTACGAAAACAAACGCGCCACTTTAGCACTCTGAAAGATGATGACCTGGTGGAATTCTCTGATTTGGAAAGTGAGGATGATGAGCGGCCACGC
117722_4941224_CHD8_16_1_2	GGAATTCTCTGATTTGGAAAGTGAGGATGATGAGCGGCCACGCTCCCGCAGACATGACCGTCATCATGCCTATGGGCGCACTGACTGCTTTCGGGTGGAAAAGCATCTCCTGGTATATGG
117722_4941225_CHD8_18_1_1	ATCCAACAGTTCTCTAAGAAGGAGATTGAAGATCTTTTAAGAAAAGGAGCATATGCAGCCATCATGGAGGAAGATGATGAAGGCTCCAAGTTTTGTGAAGAGGACATTGACCAGATCTTG
117722_4941225_CHD8_18_1_2	ATCATGGAGGAAGATGATGAAGGCTCCAAGTTTTGTGAAGAGGACATTGACCAGATCTTGTTAAGACGAACTACAACCATCACCATTGAATCTGAAGGAAAAGGTTCCACCTTTGCTAAG
117722_4941226_CHD8_19_1_1	GCCCAGGCACGATGTCATCGAATTGGGCAGAGCAAAGCTGTGAAGGTGTACCGCCTCATCACTCGTAATTCCTACGAGAGAGAGATGTTTGATAAGGCCAGCCTCAAGTTGGGGTTGGAT
117722_4941226_CHD8_19_1_2	TACCGCCTCATCACTCGTAATTCCTACGAGAGAGAGATGTTTGATAAGGCCAGCCTCAAGTTGGGGTTGGATAAGGCTGTGCTTCAATCCATGAGTGGTCGGGATGGCAACATTACTGGA
117722_4941227_CHD8_20_1_1	GTACTTATATGAACGTATTGATGGGCGAGTTAGAGGCAACCTTCGACAGGCTGCCATTGACCGCTTCAGCAAGCCTGACTCAGACCGCTTTGTCTTCTTACTGTGTACCCGGGCTGGTGG
117722_4941227_CHD8_20_1_2	GACTCAGACCGCTTTGTCTTCTTACTGTGTACCCGGGCTGGTGGACTTGGTATTAATCTTACAGCTGCTGATACCTGCATCATCTTTGATTCAGACTGGAATCCACAAAATGACCTGCAG
117722_4941228_CHD8_21_1_1	GTGCTGAAGAAAAAATCCTAACAGAATTCCGTGAAGCTTGCCATATTATACCTCATGACTTTCACCTGCAGGCCATGGTTCGTTCAGCCGGCAAACTGGTTCTTATTGACAAGTTGCTTC
117722_4941228_CHD8_21_1_2	CAAACTGGTTCTTATTGACAAGTTGCTTCCAAAGCTTAAAGCTGGTGGCCATAAAGTTCTGATCTTCTCTCAGATGGTGCGCTGCCTAGACATCCTAGAGGATTATTTAATCCAGAGGAG
117722_4941229_CHD8_22_1_1	GTTCAAAAGCTACAGGCCATTCTTAAGCCAATGATGCTGAGAAGACTCAAAGAGGATGTTGAAAAAAACTTGGCACCCAAACAGGAAACAATTATTGAAGTAGAGCTGACTAATATCCAG
117722_4941229_CHD8_22_1_2	CTTGGCACCCAAACAGGAAACAATTATTGAAGTAGAGCTGACTAATATCCAGAAGAAATACTATCGGGCTATTTTGGAGAAGAATTTCTCCTTCCTTTCCAAAGGGGCAGGTCATACCAA
117722_4941229_CHD8_22_1_3	CTATTTTGGAGAAGAATTTCTCCTTCCTTTCCAAAGGGGCAGGTCATACCAACATGCCTAATCTACTTAACACAATGATGGAGTTGCGCAAGTGCTGCAACCACCCATATCTCATCAATG
117722_4941230_CHD8_23_1_1	GAACACAAGGTGCTACTCACAGGAACACCATTGCAAAATACTGTAGAAGAACTGTTTAGCTTGCTTCATTTCTTGGAACCGTCACAATTTCCCTCAGAATCAGAGTTTCTCAAGGACTTT
117722_4941230_CHD8_23_1_2	ACACCATTGCAAAATACTGTAGAAGAACTGTTTAGCTTGCTTCATTTCTTGGAACCGTCACAATTTCCCTCAGAATCAGAGTTTCTCAAGGACTTTGGGGATCTCAAGACAGAGGAACAG
117722_4941231_CHD8_24_1_1	GGACGCCTCATCCCAGGCGCATACAAGTTTGACGCTCTGATCACCACTTTTGAGATGATTTTGTCAGATTGTCCTGAGCTTCGTGAAATTGAATGGCGTTGTGTTATCATTGATGAAGCC
117722_4941231_CHD8_24_1_2	ATTTTGTCAGATTGTCCTGAGCTTCGTGAAATTGAATGGCGTTGTGTTATCATTGATGAAGCCCATCGACTGAAAAACCGTAATTGCAAGCTGCTTGATAGTCTCAAGCACATGGACCTG
117722_4941232_CHD8_25_1_1	GCAGAACTGCATCCTGGCTGATGAGATGGGATTGGGCAAAACTATTCAGTCCATTGCCTTCTTGCAGGAAGTATATAATGTGGGCATCCATGGTCCCTTCTTGGTCATTGCCCCACTGTC
117722_4941232_CHD8_25_1_2	TGCAGGAAGTATATAATGTGGGCATCCATGGTCCCTTCTTGGTCATTGCCCCACTGTCCACAATTACTAACTGGGAGCGAGAATTTAATACATGGACAGAAATGAACACTATTGTGTACC
117722_4941232_CHD8_25_1_3	ATTACTAACTGGGAGCGAGAATTTAATACATGGACAGAAATGAACACTATTGTGTACCATGGCAGTCTGGCCAGCAGGCAGATGATTCAACAGTATGAAATGTACTGCAAAGATTCACGG
117722_4941233_CHD8_26_1_1	AATCGTCCGCAGGCAAGTGCCTGGAAGAAATTGGAGCTATCACATGAATATAAAAACAGAAACCAGCTACGGGAATATCAGTTGGAAGGGGTTAATTGGCTGCTCTTTAATTGGTATAAC
117722_4941233_CHD8_26_1_2	TCGTCCGCAGGCAAGTGCCTGGAAGAAATTGGAGCTATCACATGAATATAAAAACAGAAACCAGCTACGGGAATATCAGTTGGAAGGGGTTAATTGGCTGCTCTTTAATTGGTATAACAG
117722_4941234_CHD8_27_1_1	CCCGTTATTTACTACCTGGTGAAATGGTGCTCTCTGCCCTATGAGGATAGCACATGGGAGCTAAAAGAAGATGTTGATGAGGGCAAGATTCGAGAATTTAAACGGATTCAGTCAAGGCAC
117722_4941234_CHD8_27_1_2	GTGAAATGGTGCTCTCTGCCCTATGAGGATAGCACATGGGAGCTAAAAGAAGATGTTGATGAGGGCAAGATTCGAGAATTTAAACGGATTCAGTCAAGGCACCCAGAACTCAAAAGGGTG
117722_4941235_CHD8_32_1_1	AAGAGACGCTCAAACCGCCAAGTTAAGCGAAAAAAATATACAGAGGACCTGGATATAAAGATCACAGATGATGAAGAAGAAGAAGAGGTGGATGTAACTGGTCCAATAAAACCTGAGCCT
117722_4941235_CHD8_32_1_2	ACAGATGATGAAGAAGAAGAAGAGGTGGATGTAACTGGTCCAATAAAACCTGAGCCTATCCTCCCTGAACCAGTGCAAGAACCAGATGGCGAGACTTTGCCTTCCATGCAGTTCTTTGTG
117722_4941236_NRXN3_1_1_1	ATGAGCTCCACACTCCACTCGGTTTTCTTCACCCTGAAGGTCAGCATCCTGCTGGGGTCCCTGCTGGGGCTCTGCCTGGGCCTTGAGTTCATGGGCCTCCCCAACCAGTGGGCCCGCTAC
117722_4941236_NRXN3_1_1_2	ACCTCCGCTGGGATGCCAGCACACGCAGTGACCTGAGTTTCCAGTTCAAGACCAACGTCTCTACGGGGCTGCTCCTCTACCTGGATGATGGCGGCGTCTGCGACTTCCTATGCCTCTCCC
117722_4941236_NRXN3_1_1_3	CCTGGTGGATGGCCGCGTTCAGCTCCGCTTCAGCATGGACTGTGCCGAGACTGCCGTGCTGTCCAACAAGCAGGTGAATGACAGCAGCTGGCACTTCCTCATGGTGAGCCGTGACCGCCT
117722_4941236_NRXN3_1_1_4	CTGCGCACGGTGCTGATGCTTGATGGCGAGGGCCAGTCTGGGGAGCTGCAGCCCCAGCGGCCCTACATGGATGTGGTCAGTGACTTGTTCCTTGGTGGAGTCCCTACTGACATACGACCT
117722_4941236_NRXN3_1_1_5	CTTCTGCCCTGACCCTTGATGGAGTTCAGGCCATGCCCGGCTTCAAGGGGTTAATTCTGGATCTCAAGTATGGAAACTCGGAGCCTCGGCTTCTGGGGAGCCGGGGTGTCCAGATGGATG
117722_4941236_NRXN3_1_1_6	TGCCGAGGGACCCTGTGGTGAGCGTCCCTGTGAAAATGGTGGGATCTGCTTTCTCCTGGACGGCCACCCCACCTGTGACTGTTCTACCACTGGCTATGGTGGCAAGCTCTGCTCAGAAG
117722_4941237_NRXN3_3_1_1	CTCGAGAGGAGAATGTGGCCACTTTCCGAGGCTCAGAGTATCTGTGCTACGACCTGTCTCAGAACCCGATCCAGAGCAGCAGTGATGAAATCACCCTCTCCTTTAAGACCTGGCAGCGTA
117722_4941237_NRXN3_3_1_2	CACCCTCTCCTTTAAGACCTGGCAGCGTAACGGCCTCATCCTGCACACGGGCAAGTCGGCTGACTATGTCAACCTGGCTCTGAAGGATGGTGCGGTCTCCTTGGTCATTAACCTGGGGTC
117722_4941237_NRXN3_3_1_3	GCGGTCTCCTTGGTCATTAACCTGGGGTCCGGGGCCTTTGAGGCCATTGTGGAGCCAGTGAATGGAAAATTCAACGACAACGCCTGGCATGATGTCAAAGTGACACGCAACCTCCGGCAG
117722_4941238_NRXN3_4_1_1	GTGACAATCTCTGTGGATGGCATTCTTACCACGACGGGCTACACTCAAGAGGACTATACCATGCTGGGCTCGGACGACTTCTTCTATGTAGGAGGAAGCCCAAGTACCGCTGACTTGCCT
117722_4941238_NRXN3_4_1_2	ACTCAAGAGGACTATACCATGCTGGGCTCGGACGACTTCTTCTATGTAGGAGGAAGCCCAAGTACCGCTGACTTGCCTGGCTCCCCTGTCAGCAACAACTTCATGGGCTGCCTTAAAGAG
117722_4941239_NRXN3_5_1_1	GTTGTTTATAAGAATAATGACATCCGTCTGGAGCTGTCTCGCCTGGCCCGGATTGCGGACACCAAGATGAAAATCTATGGCGAAGTTGTGTTTAAGTGTGAGAATGTGGCCACACTGGAC
117722_4941239_NRXN3_5_1_2	TGGCCACACTGGACCCCATCAACTTTGAGACCCCAGAGGCTTACATCAGCTTGCCCAAGTGGAACACTAAACGTATGGGCTCCATCTCCTTTGACTTCCGCACCACAGAGCCCAATGGCC
117722_4941239_NRXN3_5_1_3	AGAGCCCAATGGCCTGATCCTCTTCACTCATGGAAAGCCCCAAGAGAGGAAGGATGCTCGGAGCCAGAAGAATACAAAAGTAGACTTCTTTGCCGTGGAACTCCTCGATGGCAACCTGTA
117722_4941239_NRXN3_5_1_4	GATGGCAACCTGTACTTGCTGCTTGACATGGGCTCTGGCACCATCAAAGTGAAAGCCACTCAGAAGAAAGCCAATGATGGGGAATGGTACCATGTGGACATTCAGCGAGATGGCAGATCA
117722_4941240_NRXN3_6_1_1	GTACTATATCAGTGAACAGCAGGCGCACGCCATTCACCGCCAGTGGGGAGAGCGAGATCCTGGACCTGGAAGGAGACATGTACCTGGGAGGGCTGCCGGAGAACCGTGCTGGCCTTATTC
117722_4941240_NRXN3_6_1_2	AGGGCTGCCGGAGAACCGTGCTGGCCTTATTCTCCCCACCGAGCTGTGGACTGCCATGCTCAACTATGGCTACGTGGGCTGCATCCGCGACCTATTCATTGATGGGCGCAGCAAGAACAT
117722_4941240_NRXN3_6_1_3	GACCTATTCATTGATGGGCGCAGCAAGAACATTCGACAGCTGGCAGAGATGCAGAATGCTGCGGGTGTCAAGTCCTCCTGTTCACGGATGAGTGCCAAGCAGTGTGACAGCTACCCCTGC
117722_4941240_NRXN3_6_1_4	TGAGTGCCAAGCAGTGTGACAGCTACCCCTGCAAGAATAATGCTGTGTGCAAGGACGGCTGGAACCGCTTCATCTGCGACTGCACCGGCACCGGATACTGGGGAAGAACCTGCGAAAGGG
117722_4941241_NRXN3_7_1_1	AGGCATCCATCCTGAGCTATGATGGTAGCATGTACATGAAGATCATCATGCCCATGGTCATGCATACTGAGGCAGAGGATGTGTCCTTCCGCTTCATGTCCCAGCGAGCTTATGGGCTGC
117722_4941241_NRXN3_7_1_2	CCTTCCGCTTCATGTCCCAGCGAGCTTATGGGCTGCTGGTGGCTACGACCTCCAGGGACTCTGCCGACACCCTGCGTCTGGAGCTGGATGGGGGGCGTGTCAAGCTCATGGTTAACTTAG
117722_4941242_NRXN3_8_1_1	CAAAGGACCAGAGACCTTGTATGCAGGGCAGAAGCTCAATGACAACGAGTGGCACACCGTTCGGGTGGTGCGGAGAGGAAAAAGCCTTAAGTTAACCGTGGATGATGATGTGGCTGAGG
117722_4941243_NRXN3_9_1_1	GTACAATGGTGGGAGACCATACCCGTTTGGAGTTCCACAACATTGAAACGGGAATCATGACTGAGAAACGCTACATCTCCGTTGTCCCCTCCAGCTTTATTGGCCATCTGCAGAGCCTCA
117722_4941243_NRXN3_9_1_2	CCTCCAGCTTTATTGGCCATCTGCAGAGCCTCATGTTTAATGGCCTTCTCTACATTGACTTGTGCAAAAATGGTGACATTGATTATTGTGAGCTGAAGGCTCGTTTTGGACTGAGGAACA
117722_4941243_NRXN3_9_1_3	GTGAGCTGAAGGCTCGTTTTGGACTGAGGAACATCATCGCTGACCCTGTCACCTTTAAGACCAAGAGCAGCTACCTGAGCCTTGCCACTCTTCAGGCTTACACCTCCATGCACCTCTTCT
117722_4941243_NRXN3_9_1_4	CTCTTCAGGCTTACACCTCCATGCACCTCTTCTTCCAGTTCAAGACCACCTCACCAGATGGCTTCATTCTCTTCAATAGTGGTGATGGCAATGACTTCATTGCAGTCGAGCTTGTCAAGG
117722_4941244_NRXN3_10_1_1	GTATATACACTACGTTTTTGACCTCGGAAACGGTCCCAATGTGATCAAAGGCAACAGTGACCGCCCCCTGAATGACAACCAGTGGCACAATGTCGTCATCACTCGGGACAATAGTAACAC
117722_4941244_NRXN3_10_1_2	ATGACAACCAGTGGCACAATGTCGTCATCACTCGGGACAATAGTAACACTCATAGCCTGAAAGTGGACACCAAAGTGGTCACTCAGGTTATCAATGGTGCCAAAAATCTGGATTTGAAAG
117722_4941245_NRXN3_11_1_1	GTGATCTCTATATGGCTGGTCTGGCCCAAGGCATGTACAGCAACCTCCCAAAGCTCGTGGCCTCTCGAGATGGCTTTCAGGGCTGTCTAGCATCAGTGGACTTGAATGGACGCCTGCCAG
117722_4941245_NRXN3_11_1_2	TCGTGGCCTCTCGAGATGGCTTTCAGGGCTGTCTAGCATCAGTGGACTTGAATGGACGCCTGCCAGACCTCATCAATGATGCTCTTCATCGGAGCGGACAGATCGAGCGTGGCTGTGAAG
117722_4941246_NRXN3_12_1_1	ACCCAGTACCACCTGCCAGGAAGATTCATGTGCCAACCAGGGGGTCTGCATGCAACAATGGGAGGGCTTCACCTGTGATTGTTCTATGACCTCTTATTCTGGAAACCAGTGCAATGATC
117722_4941247_NRXN3_13_1_1	CTGGCGCTACGTACATCTTTGGGAAAAGTGGTGGGCTTATCCTCTACACCTGGCCAGCCAATGACAGGCCCAGCACGCGGTCTGACCGCCTTGCCGTGGGCTTCAGCACCACTGTGAAGG
117722_4941247_NRXN3_13_1_2	GACAGGCCCAGCACGCGGTCTGACCGCCTTGCCGTGGGCTTCAGCACCACTGTGAAGGATGGCATCTTGGTCCGCATCGACAGTGCTCCAGGACTTGGTGACTTCCTCCAGCTTCACATA
117722_4941248_NRXN3_14_1_1	GAACAGGGGAAAATTGGAGTTGTCTTCAACATTGGCACAGTTGACATCTCCATCAAAGAGGAGAGAACCCCTGTAAATGACGGCAAATACCATGTGGTACGCTTCACCAGGAACGGCGGC
117722_4941248_NRXN3_14_1_2	TCAAAGAGGAGAGAACCCCTGTAAATGACGGCAAATACCATGTGGTACGCTTCACCAGGAACGGCGGCAACGCCACCCTGCAGGTGGACAACTGGCCAGTGAATGAACATTATCCTACAG
117722_4941249_NRXN3_16_1_1	GCCGGCAGTTAACCATCTTCAACACTCAGGCGCAAATAGCCATTGGTGGAAAGGACAAAGGACGCCTCTTCCAAGGCCAACTCTCTGGGCTCTATTATGATGGTTTGAAAGTACTGAACA
117722_4941249_NRXN3_16_1_2	TTATGATGGTTTGAAAGTACTGAACATGGCGGCTGAGAACAACCCCAATATTAAAATCAATGGAAGTGTTCGGCTGGTTGGAGAAGTCCCATCAATTTTGGGAACAACACAGACGACCTC
117722_4941249_NRXN3_16_1_3	ATTTTGGGAACAACACAGACGACCTCCATGCCACCAGAAATGTCTACTACTGTCATGGAAACCACTACTACAATGGCGACTACCACAACCCGTAAGAATCGCTCTACAGCCAGCATTCAG
117722_4941250_ARHGAP11A_12_1_1	GTTCAGAAAAGATCAGTAAGTCTGAGGAAACCTTACTAACTCCAGAGCGACTAGTTGGAACAAATTACCGGATGTCTTGGACAGGACCTAATAATTCAAGTTTTCAAGAAGTAGATGCAA
117722_4941250_ARHGAP11A_12_1_2	GATGCAAATGAAGCTTCTTCAATGGTGGAAAATCTTGAGGTAGAAAACTCTTTGGAGCCTGATATTATGGTAGAAAAGTCACCTGCTACTTCATGTGAACTCACCCCTTCCAATTTAAAC
117722_4941250_ARHGAP11A_12_1_3	TTTAAACAATAAGCATAATAGCAACATAACAAGTAGCCCTCTTAGCGGGGATGAAAATAACATGACCAAAGAGACTTTGGTGAAAGTTCAAAAAGCGTTTTCTGAATCTGGAAGTAATCT
117722_4941250_ARHGAP11A_12_1_4	GTAATCTTCACGCATTGATGAATCAGAGGCAGTCATCAGTAACTAATGTGGGGAAAGTAAAATTAACTGAACCATCTTATTTAGAAGATAGCCCAGAGGAAAATCTATTTGAAACTAATG
117722_4941250_ARHGAP11A_12_1_5	ACTAATGATTTGACTATAGTAGAATCAAAGGAGAAATATGAACACCACACTGGTAAAGGTGAAAAATGTTTTTCAGAGAGGGACTTTTCACCCCTTCAAACTCAAACATTTAATAGAGAA
117722_4941250_ARHGAP11A_12_1_6	TAGAGAAACAACTATAAAATGTTATTCAACTCAGATGAAGATGGAACATGAAAAAGACATTCATTCAAATATGCCAAAAGATTATTTAAGCAAGCAAGAATTCTCCAGTGATGAAGAAAT
117722_4941250_ARHGAP11A_12_1_7	AAGAAATAAAGAAACAGCAGTCCCCAAAGGATAAACTAAATAATAAATTAAAAGAGAATGAGAATATGATGGAAGGTAACTTACCGAAGTGTGCAGCACATAGCAAGGACGAGGCTAGAT
117722_4941250_ARHGAP11A_12_1_8	GCTAGATCCTCTTTCTCACAGCAGAGTACATGTGTTGTAACAAACTTGTCAAAACCTAGGCCTATGAGAATTGCTAAACAGCAGTCATTGGAAACATGTGAGAAAACAGTTTCTGAAAGT
117722_4941250_ARHGAP11A_12_1_9	TGAAAGTTCACAAATGACAGAACATAGAAAGGTTTCTGATCACATACAGTGGTTTAACAAGCTTTCTTTAAATGAACCAAATAGAATAAAAGTCAAGTCACCTCTTAAGTTTCAGCGTAC
117722_4941250_ARHGAP11A_12_1_10	AGCGTACTCCTGTTCGTCAGTCCGTCAGAAGAATTAATTCTTTGTTGGAGTATAGCAGACAACCTACAGGGCATAAGTTGGCGAGTCTTGGTGATACAGCTTCTCCTTTGGTCAAATCAG
117722_4941250_ARHGAP11A_12_1_11	AAATCAGTGAGCTGTGACGGTGCTCTTTCCTCTTGTATAGAAAGTGCATCAAAAGATTCCTCTGTTTCATGTATCAAATCAGGTCCTAAAGAACAGAAGTCCATGTCATGTGAAGAGTCA
117722_4941250_ARHGAP11A_12_1_12	AGAGTCAAATATTGGTGCAATTTCAAAGTCAAGCATGGAGTTACCCTCGAAATCTTTCTTAAAGATGAGGAAGCACCCAGATTCAGTGAATGCTTCTCTTAGGTCTACTACAGTTTATAA
117722_4941250_ARHGAP11A_12_1_13	TTTATAAACAGAAGATCTTATCTGATGGCCAAGTTAAGGTTCCCTTGGATGATCTGACTAATCATGATATAGTAAAACCAGTTGTAAATAACAACATGGGCATTTCTTCTGGGATAAATA
117722_4941250_ARHGAP11A_12_1_14	ATAAATAACAGGGTCCTTAGGAGACCATCAGAAAGAGGAAGGGCCTGGTACAAAGGTTCTCCAAAACATCCTATCGGAAAAACTCAATTACTACCAACAAGTAAACCTGTAGATTTGTAA
117722_4941251_ARHGAP11B_1_1_1	ATGTGGGATCAGAGGCTGGTGAAGTTGGCCCTGTTGCAGCATCTGCGGGCCTTCTATGGTATTAAGGTGAAGGGTGTCCGTGGGCAGTGCGATCGCAGGAGACATGAAACAGCAGCCACG
117722_4941251_ARHGAP11B_1_1_2	CAGAGGCTGGTGAAGTTGGCCCTGTTGCAGCATCTGCGGGCCTTCTATGGTATTAAGGTGAAGGGTGTCCGTGGGCAGTGCGATCGCAGGAGACATGAAACAGCAGCCACGGAAATAGGG
117722_4941260_ARHGAP11A_1_1_1	ATGTGGGATCAGAGGCTGGTGAGGTTGGCCCTGTTGCAGCATCTGCGGGCCTTCTATGGTATTAAGGTGAAGGGTGTCCGTGGGCAGTGCGATCGCAGGAGACATGAAACAGCAGCCACG
117722_4941260_ARHGAP11A_1_1_2	CAGAGGCTGGTGAGGTTGGCCCTGTTGCAGCATCTGCGGGCCTTCTATGGTATTAAGGTGAAGGGTGTCCGTGGGCAGTGCGATCGCAGGAGACATGAAACAGCAGCCACGGAAATAGGG
117722_4941261_ARHGAP11A_2,3_1_1	GGTAAAATATTTGGAGTACCTTTTAATGCACTGCCCCATTCTGCTGTACCAGAATATGGACACATTCCAAGCTTTCTTGTCGATGCTTGCACATCTTTAGAAGACCATATTCATACCGAA
117722_4941261_ARHGAP11A_2,3_1_2	CCAGAATATGGACACATTCCAAGCTTTCTTGTCGATGCTTGCACATCTTTAGAAGACCATATTCATACCGAAGGGCTTTTTCGGAAATCAGGATCTGTGATTCGCCTAAAAGCACTAAAG
117722_4941262_ARHGAP11A_4_1_1	AATAAAGTGGATCATGGTGAAGGTTGCCTATCTTCTGCACCTCCTTGTGATATTGCGGGACTTCTTAAGCAGTTTTTTAGGGAACTGCCAGAGCCCATTCTCCCAGCTGATTTGCATGAA
117722_4941262_ARHGAP11A_4_1_2	AGCAGTTTTTTAGGGAACTGCCAGAGCCCATTCTCCCAGCTGATTTGCATGAAGCACTTTTGAAAGCTCAACAGTTAGGCACAGAGGAAAAGAATAAAGCTACACTGTTGCTCTCCTGTC
117722_4941262_ARHGAP11A_4_1_3	TCAACAGTTAGGCACAGAGGAAAAGAATAAAGCTACACTGTTGCTCTCCTGTCTTCTGGCTGACCACACAGTTCATGTATTAAGATACTTCTTTAACTTTCTCAGGAATGTTTCTCTTAG
117722_4941263_ARHGAP11A_5_1_1	ATCCAGTGAGAATAAGATGGACAGCAGCAATCTTGCAGTAATATTTGCACCGAATCTTCTTCAGACAAGTGAAGGACATGAAAAGATGTCTTCTAACACAGAAAAGAAGCTACGATTACA
117722_4941263_ARHGAP11A_5_1_2	TTGCACCGAATCTTCTTCAGACAAGTGAAGGACATGAAAAGATGTCTTCTAACACAGAAAAGAAGCTACGATTACAGGCTGCAGTAGTACAGACTCTTATCGATTATGCATCAGATATTG
117722_4941264_ARHGAP11A_6_1_1	GGCGTGTACCAGATTTTATCCTGGAAAAGATACCAGCCATGTTGGGTATTGATGGTCTCTGTGCTACTCCATCACTGGAAGGCTTTGAAGAAGGTGAATATGAAACTCCTGGTGAATATA
117722_4941264_ARHGAP11A_6_1_2	AGATACCAGCCATGTTGGGTATTGATGGTCTCTGTGCTACTCCATCACTGGAAGGCTTTGAAGAAGGTGAATATGAAACTCCTGGTGAATATAAGAGAAAGAGAAGACAAAGTGTAGGAG
117722_4941265_ARHGAP11A_8_1_1	CCCAGCTATCTGAATCACCAGTGATTCTTACACCAAATGCTAAGCGTACATTGCCAGTAGATTCTTCTCATGGTTTCTCAAGTAAGAAAAGGAAGTCCATCAAGCACAATTTTAACTTTG
117722_4941265_ARHGAP11A_8_1_2	CATTGCCAGTAGATTCTTCTCATGGTTTCTCAAGTAAGAAAAGGAAGTCCATCAAGCACAATTTTAACTTTGAGCTGTTGCCAAGTAATCTCTTCAATAGCAGTTCTACACCGGTATCAG
117722_4941266_ARHGAP11A_9_1_1	TTCACATCGATACAAGCTCAGAAGGGTCATCTCAGAGTTCACTCTCTCCTGTACTCATTGGTGGAAACCATTTGATCACTGCAGGTGTGCCAAGGCGAAGTAAAAGAATTGCAGGCAAAA
117722_4941266_ARHGAP11A_9_1_2	TACAAGCTCAGAAGGGTCATCTCAGAGTTCACTCTCTCCTGTACTCATTGGTGGAAACCATTTGATCACTGCAGGTGTGCCAAGGCGAAGTAAAAGAATTGCAGGCAAAAAAGTTTGCAG
117722_4941267_ARHGAP11A_11_1_1	AATGGATGTTCTGGTGTCAATAGATATGAAAGTGTTGGTTGGCGACTTGCAAATCAACAAAGTTTAAAAAATCGAATTGAATCTGTAAAAACAGGTTTGCTTTTTAGCCCAGATGTTGAT
117722_4941267_ARHGAP11A_11_1_2	ATAGATATGAAAGTGTTGGTTGGCGACTTGCAAATCAACAAAGTTTAAAAAATCGAATTGAATCTGTAAAAACAGGTTTGCTTTTTAGCCCAGATGTTGATGAAAAGTTACCAAAGAAAG
117722_4941273_BOLA2_1_1_1	TTGTTGCTGTAGCCCATGCTGTTTATCAAGCAATGCTCAGCTTGAAGAATATTCCTGTTTTGGAGACTGCCTATAAGTTAATATTGGGAGAAATGACTTGTGCCCTAAACAACCTCCTGC
117722_4941273_BOLA2_1_1_2	ACAGTCTGCAACTTCCTGAGGCCTGTTCTGAAATAAAACATGAGGCTTTTAAGAATCATGTGTTCAATGTAGACAATGCAAAATTTGTAGTTAAATTTGACCTCAGTGCCCTGACTACAA
117722_4941273_BOLA2_1_1_3	TTGGAAATGCCAAAAACTCGAGTCTTTAATTGTAATGACTTTGTTTTATCCACAGTTAAGCCTTTTCTCATTACATATTTATGTATTTCACTGTCATGTCAACATGTCTGCAGAATCAC
117722_4941274_BOLA2_3_1_1	CTTGGATCCTAGCATGACTATACATTGTGACATGGTCATTACATATGGATTAGACCAACTGGAGAATTGCCAGACTTGTGGTACCGATTATATCATCTCAGTCTTGAATTTACTCACGCT
117722_4941274_BOLA2_3_1_2	TTGGATCCTAGCATGACTATACATTGTGACATGGTCATTACATATGGATTAGACCAACTGGAGAATTGCCAGACTTGTGGTACCGATTATATCATCTCAGTCTTGAATTTACTCACGCTG
117722_4941275_BOLA2_6_1_1	GCTGGTGAACGCGTGCCTAGCAGAAGAGCTCCCGCACATCCATGCCTTTGAACAGAAAACCCTGACCCCAGACCAGTGGGCACGTGAGCGACAGAAATGAGGGACTGGGATCTGCACAGC
117722_4941277_CORO1A_1_1_1	ACCAGAAAATAAAGCCATTTTATTATGATTTTTTTCTCTGCCATGTGGCTGGGAATGGGAGGTGAGTGGATGGGTGTGAATGGCTGACCCTGCTGGAGGCCCTGCGGGGCTCTACTTGGC
117722_4941277_CORO1A_1_1_2	AGGCCCTGCGGGGCTCTACTTGGCCTGGACTGTCTCCTCCAGCCTGTCCAAGCGCTTCTGGAGCTCCTGCACCGTGGCCTGGAGCTTCCGCATCTCCTCCTCCAGCCGAGACACGGCATC
117722_4941278_SLX1A_1_1_1	ATGGGTCCCGCGGGGGTCGCGGCGAGGCCAGGGCGCTTTTTCGGCGTCTACCTGCTCTACTGCCTGAACCCCCGGTACCGGGGCCGCGTCTACGTGGGGTTCACTGTCAACACTGCTCGT
117722_4941278_SLX1A_1_1_2	CCCCCGGTACCGGGGCCGCGTCTACGTGGGGTTCACTGTCAACACTGCTCGTCGGGTCCAGCAGCACAATGGGGGCCGCAAAAAAGGCGGGGCCTGGCGGACCAGCGGGCGAGGGCCCTG
117722_4941279_SLX1A_4-6_1_1	GATGAAGAGGGGCCCTTGTGTTGCCCCCACCCTGGCTGCCTGCTAAGGGCCCATGTGATCTGCCTGGCAGAGGAGTTTCTTCAGGAAGAACCAGGGCAGCTTCTGCCCCTAGAGGGCCAA
117722_4941279_SLX1A_4-6_1_2	CTGGCAGAGGAGTTTCTTCAGGAAGAACCAGGGCAGCTTCTGCCCCTAGAGGGCCAATGCCCTTGCTGTGAGAAGTCACTGCTTTGGGGAGACCTGATCTGGCTGTGCCAGATGGACACT
117722_4941279_SLX1A_4-6_1_3	TGCTGTGAGAAGTCACTGCTTTGGGGAGACCTGATCTGGCTGTGCCAGATGGACACTGAGAAAGAAGTAGAAGACTCAGAATTAGAAGAGGCACACTGGACAGACCTGCTGGAGACCTGA
117722_4941280_HYDIN_1_1_1	GTGATCTTCCGAAACGAGGTGACAAATGAGTTCTTGTACTACAATGTGAGTTTCAGGGTCATCCCTTCAGGCATCATCAAAACCATCGAGATGGTGACCCCAGTCCGGCAAGTTGCGTCA
117722_4941281_HYDIN_2_1_1	ATTCCGGGTCATCGTGGAAATACTGAAACCAGAGAAGCCGGACCTAAGCATCACTATGAAGGGCCTTGATTACATTGATGTACTGTCTGGCTCTAAGAAAGACTACAAGCTGAACTTCTT
117722_4941282_HYDIN_3_1_1	GGCACCCTCTTCTTCCCCCTCCCAGATGGGACCGGCTGGCTGTATGCTCTGCATGGGACTTCTGAGCTCCCCAAAGCTGTAGCCAATATCTATCGTGAAGTGCCATGTAAGACCCCCTAC
117722_4941283_HYDIN_4_1_1	GTAGTGAATTTCACGTGCCAGGTGCGCTCCAAGCACACGCAGACCATCCTGCTGTCAAACCGCACCAACCAGACCTGGAATCTGCACCCCATCTTTGAGGGCGAGCACTGGGAGGGGCCT
117722_4941284_HYDIN_5_1_1	GTTTAAATGGGACATCAAAAAATTTGAGCCTCATTTCTCCATTAGCCCAGAAGAAGGCTATATTACCTCAGGCATGGAGGTTTCTTTTGAAGTGACCTACCATCCCACCGAGGTGGGAAA
117722_4941285_HYDIN_6_1_1	GTCCTTACCCTGGCGCCCTTCCACAACATCACACTGAAGCCCAAAGAAGTCTGTAAACTGGAAGTCATCTTTGCCCCGAAGAAGCGTGTCCCTCCCTTCTCTGAGGAAGTGTTCATGGAA
117722_4941286_HYDIN_7_1_1	ATTTTAGTCCTAGATCCAGCCAACAGGATTGTGAAGTTGGGAGCTGTCCTACCAGGGCAGGTTGTGAAAAGAACAGTTTCCATCATGAACAACAGCCTGGCCCAGCTCACATTTAATCAG
117722_4941287_HYDIN_8_1_1	CATAGATTGTCTGTACACCAACACCACTCACCTCGAGGTGAACTCCCGTGTTGATGTGGTAAAGCCAGGAAACACATTGGAGATTCCAATAACTTTTTATCCTCGAGAAAGTATCAACTA
117722_4941288_HYDIN_9_1_1	ATCAGCCATGGTCCAACATTTATGTGCAACATCTCAGGCTGTGCTGTGAGCCCGGCTATCCATTTCTCCTTCACCAGCTACAACTTTGGGACCTGCTTTATCTATCAAGCTGGGATGCCC
117722_4941289_HYDIN_10_1_1	GTGGAGTTAAATGAATGTGTCCAGTGTGAATTCAACTTTATCAACACTGGAAAGTTCACCTTCAGCTTCCAGGCACAGCTGTGTGGCTCCAAAACCTTGCTGCAGTACTTGGAATTTTCA
117722_4941290_HYDIN_11_1_1	GTTCCCAATTGATATTTTCTTCACACCAAAGCAGGAAGGAGATGTGAACTTTAATTTGATCTGCAATGTGGAAAAGAAAGTCCACCCTGTGACATTAAATGTCAAGGCCGAGGGCTACAC
117722_4941291_HYDIN_12_1_1	GCAGAGAAGCCAGGGAGACTGTGCAGATCATTAACAAGGAGGAGCAGGGGTTCGATTTTTCCTTCCAGGACAACTCCCGCTATTCTGAAGGTTTCAGCAACAGCCTGCTTGTATGTCCCA
117722_4941292_HYDIN_13_1_1	ATCGTGTTCCAGTTCACACCTTTCCATCTGGGCATCACTGAGTCATCATGGACCTTCCTAATTCCCGAGCACAACATCACAGTCCCTTTCCTGCTGGTAGGCAAAACTACCGAACCTCTC
117722_4941293_HYDIN_14_1_1	GACCTTTACCATCCTAAACCCAACCAATAGCACCTACTCCTTCTGCTGGATCTCTGAAGAAATTGAAAGTCTCCAGAACCCTGCAGCATTCACATGCCTTACAGAAAAGGGCTTCATCCA
117722_4941294_HYDIN_15_1_1	GATTCCCAACCTGCCACCTGGAGAGCAAGGTCCGGTCCTGGTAGCAAAAGGGCGGAGCACCTTGCCCATCTGCCATTTTGATCTGAAAGACTCGGACTACATAAGTGGCCATCAGCGCAA
117722_4941295_HYDIN_16_1_1	GTTCAGCTCAAAAAGATCAGCTTAGTCAGGGCACGATGCATACAGGCAGCACCCTGGACAGCACCATGGACCACTGGGCCGAGGGTTCCCCACAGCCCTTCTCTGTGGAGCCCTCTTCGG
117722_4941296_HYDIN_18_1_1	GTGATAGAGACGGATCCGGAACCTGCTCACTCAGTACTAGAAGAAAACTACCAAGAACTGCAGCTTCAAATCAGTGCCAATGTGGATTTCGCTTCATACCATTGCCAAGCAAGAGATGTG
117722_4941297_HYDIN_19_1_1	ATGGGCCACCTCCACCCTGGGTGTGCCAAGGACATAGTGGTGACCATGAAGTCAGATGTACCCATCAACCTAAAGAATATGCGGATCAGGTGCAAGCTCTCCAGGATTATGTTTCAGCTC
117722_4941298_HYDIN_20_1_1	CTGCTCTGGTGGACCACATCCAATTTGGGGACTGCCACATTGGACACAGCTATAATGCGAGCTTCACAGTCACAAATCACAGCCAAGTGAACTTGATACGGTTTGAATGGCCTGTTTCAG
117722_4941299_HYDIN_21_1_1	CAAAGAAAGCTCACACAGCCTCCTTGGTTGTTTCTCCTGGAGATACAGCTGAATTTGATGTCGTTTTCCACTCCCAGAAGGTTGGGAGGATGAGAGGTATCATCCACTTGTCAGTGATCA
117722_4941300_HYDIN_23_1_1	CACCCTGGCCAAGAGCCGAGGCCTCGTGTTTGACATCGCTGGTGAGGGGAACCTCCCTCGAGTGACGGTTGTGCGGCCAGTTCTTCATAACCAATATGGAAACCCCTTGCTCCTCTTTAA
117722_4941301_HYDIN_24_1_1	CCCTTTGCCCGCATCGTCGACATTTTTGAAGTGGAACCCAGCAAGATGTGCATTGCCAGTCATTCCCATGCCTTTGCCACGGTGTCCTTCACCCCGCAGATCATGCAGAACTACCAGTGC
117722_4941302_HYDIN_25_1_1	CCTTCGTGACCGAAAACAATGCCTTGATATTTGAAGAGCACCAGATATGTACCAGTGCCAACCTGCACCACATCCTGCAGACCATAGAGAGCGGGGGGCTGTTCGTCGAGGATGAGAACA
117722_4941303_HYDIN_26_1_1	GCCCGCTTCGCCCATGGCATGTTCACCGTGTACCCTGGGTTTGGCTCCATTCCTTCCGGAGGACAGCAGGTCATCAACGTTGACTGTGTGGCTGACGCCATGGGAAAGTGTGAGGAGTTT
117722_4941304_HYDIN_28_1_1	ATTATTGAGCCCAATATTTCAGAAGGAGGTGAGATCATTGCCAGCATCCCAATTAAGTTTTCCGCGAATGCAGTATATTCCAAATACAACATCACCCCCTCCTCTGTCATCAACTTTGGA
117722_4941305_HYDIN_29_1_1	CTTTTCCGTGGACTCTGTAGGGATTTCAACACCTAATATAAATTCCATGATCTCAGTCCAACCCAAAAAGGGTTCACTGACCCCAACAGAAAAACCCACAAATGTCCAAGTTTTCTTCCA
117722_4941306_HYDIN_32_1_1	ACAGGAATCCAGGGTAGTTCTTCTCCGCAATGTCACGCTCCTGCCTGTGGCCTGGCGGATCACCAGCCTGGAGCACTTGGGTGATGATTTCACTGTATCCCTGATGCAGGGGACCATCCC
117722_4941307_HYDIN_33_1_1	ATATTAAACGTATGGGCCTACCCTACTTCAGTTGGTGTCTTTGAAGACAGCATTGTCTGCTGCATCAATGACAACCCAGAGCCAGCCATCTTCCAATTAAGCTGCCAGGGGATCCGCCCG
117722_4941308_HYDIN_34_1_1	GTACAAGTCATCCTTATTCCCAGGCAACATGGAGACGCTAACAATCCTGAACACTTCCTTAATGGTGGTGGAGGCATCCTTCTATTTTCAGAATGATGTCAAAGCAAACACGTACTTCCT
117722_4941309_HYDIN_35_1_1	GTGGTATTTCCTCAGCGGAAGATGGACATGAAGACAAATGAGGTCATCTTTAAGAAGTATGTTATGAGCACGGAGACGTACTACTTTGGGCCACTACTTTGTGGAAAATCAAGAGATAA
117722_4941310_HYDIN_36_1_1	ACTGAATCACTTCCGGTGGATCGTGCCAGCCAATGGCGAGGTAACGTTGCAGGTGCACTTCTCTTCTGATGAGTTCGGGAACTTTGACCAAACCTTTAACTTTGAGATCCTAGGAACTTG
117722_4941311_HYDIN_37_1_1	GCTCAAGAGGAGCAGACCAGCTCATCTAAGGGGGGCAAACAGAAAATGAAAGAAAAGATAGACCAAGTCTTCGAGATTCAGAAAGACAAGCGTCACATGGCCTTAAACAGGAAGGTCCTT
117722_4941312_HYDIN_38_1_1	ATCCTAGACATCTTGGGTCTGGGTGCCTCCGGACCACCCATCCCGCCTCCCGCCTTATTCTCAATCGTCTCCTACCCGGTGAAGCGGCCACCTTTGACCATGACAGACGACCTGGAGCAT
117722_4941313_HYDIN_39_1_1	GTTCCTCCGCTCACCAAAGTGGATGTCAAGATGGAGACAATCGAAAGGAAAATATCTGTTAGGGAACAAACAATGTCTGAGAAGGAAGAGCTAAATAAGAAGAAAAGGAACATGGGCGAT
117722_4941314_HYDIN_40_1_1	GGAGCAGGAGAGGCTGGCAAAGGAAATGCAAGAAAAGAAGCTACAGCAGGAGCTGGAGCGACAAAAGGAAGAGGATGAGCTGAAACGGAGGGTCAAAAAAGGAAAGCAGGGACCCATTAA
117722_4941315_HYDIN_41_1_1	AACGCAAGCACAAGGGAGCTCTTGAGAAAGAGAAGGAGCGTCTCCAAAACATGGATGAGGAAGAATATGATGCCCTGACTGAGGAGGAGAAACTCACATTCGATCGGGGGATTCAGCAGG
117722_4941316_HYDIN_42_1_1	CTGAGTGACTGCTACCGAGGAGTGGTGTTTGATGGCCTCGACACTCTCTTTGCTCAGAATGCTGCAGCCGCCCTCCTCTGCCTGCTGAAGGCCATTGGCAGCCGGGAGCATATATACATT
117722_4941317_HYDIN_43_1_1	ATTTCCTCCAGCCCTCTCCCCCCGGGGCCCATCCACCGCTGGCTCAGTGTTAGTCCCAGTGTCGGAGGCGAGACCGGGCTGATGAGCTGTGTGCTCCCGGATGAACTTCTCGTGCAGATC
117722_4941318_HYDIN_44_1_1	CCCAGGAGGCAGCTGTGGGTCAAAACGTCATAGGGCAAGGACGACTGAGCACTGACACCTTGGGCAAGTTAGCCTCCGAGATGACTCTGGTGGCCCCAGAAATTAAACCTGGAAAGAGTG
117722_4941319_HYDIN_45_1_1	GAAAGTCAGCCAATGCCGTTAGCGTGGCCAAGTACTACAACGCAGCCTGCCTGAGCATCGACTCCATTGTGCTGGAAGCTGTGGCCAACAGCAACAACATCCCAGGGATCCGGGCCCGTG
117722_4941320_HYDIN_46_1_1	CTGACAAGCTTCAGAGCATTGACAGCCACTCCATGGAGGAAGTTGGAGAGGTGGAAAACAACCCAGTGAGCAAAGCAATCGCTCGCCACCTGGGCATTGACATTTCTGCAGAAGGCCGCC
117722_4941321_HYDIN_47_1_1	AAGAGGAAGATATAACCTCATCAGATCAGGGAACCTCCAATAGCACAAAGAGGACATCGCTGAGCCGAGGGATCTCTGTCACATCCAACCTGGAAGAATGGCACGCCCTGTTGGTCGAGT
117722_4941322_HYDIN_48_1_1	ATCTTGCGGAAGCTGAAGGGCTATGATTCCTACAACACCCTGCTGCTGCCTCCCCGCAACCCTGGGGAGAAGCTGCCCCCAGAACTGTACGAGTACTTCAAAGAGATAAAGAAGTCAAAA
117722_4941323_HYDIN_49_1_1	AATTCTACAGCCAAACCCTGGTGTTTCAGATTGCCCAGAGTGCTCAAAAGCTTACCCTCCTGGCACGTGGGCAAGGTCTAGAGCCACGCCTGGAATTTAGTCCTTCAGTCCTGGATCTGG
117722_4941324_HYDIN_50_1_1	CTGGAGAAACACATGCCGAAGTACTTAAGACAGAAACTACGCGCTGAATTAAAGCCAAAGACACGGATCTTCGAAATCCAGCCCATTTCTGGAGTCTTGGATCCTGGTGAGAAGTCCAAC
117722_4941325_HYDIN_51_1_1	GTGGTTGGAGGGCCAACAGTTCACATCTGTCTCCAAGCCAAGGTGACCATTCCAACCATGACTCTCTCTCGTGGAAAAGTGGACTTTGCCACAATTCAGTGTGGACAGTGCCTGGTGGAA
117722_4941326_HYDIN_52_1_1	GATTCAGTACTGAGCTAGATCGTGTAAAGAATCTACCTCATTGTGAAACGGAAATATTTGAAGTGAGATTTGACCCACAGGGGGCCAATCTTCCTGTTGGAAGCAAAGAAGTCATTCTGC
117722_4941327_HYDIN_53_1_1	AATCCAGCTACCAGAGTACATCCTGGACTTTGGCTACATCATCCTTGGCGAAGTCCGAACCCACATCATCAAGATCATCAACACCAGTCACTTTCCAGTGTCATTCCATGCAGACAAGCG
117722_4941328_HYDIN_54_1_1	GTAAGTGCTCATCTCCAGATGGAGGTAGAAAGACTTATAGTCCAAAGCTATGTCCTAGAACATCAGAAAACAACCACCCCTGATCCTATGGATGACCCCTGCTTCAGCCATCGGAGTCGC
117722_4941329_HYDIN_55_1_1	CAAATGAAAAGTATGAAATGTTCTTGAATCAAGCCAGGAAAAACACAGACAAAGAGTATAACAAATGTGAAATGCTCGATCACTTTGACATAATAACTGAGGAAGTGCCAGAAGACGAGC
117722_4941330_HYDIN_56_1_1	GGCTTTATCAGTTCACATCAAGAGCAGGTATTAAAAGTTTACTACCTACCTGGAGTACCTGAGGTCTTTAAAAGGAGTTTCCAGATACAGATCGCCCACCTGGACCCAGAAAATATCACT
117722_4941331_HYDIN_57_1_1	CTGTTTGACCATGTCACAGAGAGGGAAATCACGCTGACGAACATGGGGAAAGTTGGCTTTGAGTTCAAGGTTCTGACTGACCACCAGTCTTCTCCAGACAACCTTCTCCCTGGAGTGCCA
117722_4941332_HYDIN_58_1_1	GTGTTTGATATTTTGCCCCTGTTTGGAGTGTTGCAGCCACACAGTAGCCACCAAATATCGTTCACCTTCTATGGACACGCTAACATCATTGCACAAGCTAAAGCTCTGTGTGAAGTGGAA
117722_4941333_HYDIN_59_1_1	AAATAAAAATTAGCTCTACTGAAATAGAAAGAATATACTCAAGCCAGAGCCAGGTGGAGGATCAGGAATCCCTACAGACCTGTGAACAGAATGAGATGCTTTCCATTGGGATAGAAGAA
117722_4941334_HYDIN_61_1_1	GTTTGTGACATTGCCGAAGAAGCCCTACAGTGCCCCAGTGTCCCAGATGGAGTCCATCCCAGCAACCTCAGAGGCTGCCAGCCCACCAGCAATCCTAGTTACAGTAGAGTCCCCCGAGAT
117722_4941335_HYDIN_62_1_1	CCTATTAAACTGGAAATTGATGAAGAAAAAAACCTGCTGATCAAGTTTGACCCTTCCTACAGAAACGATCTGAACAACTGGGTGGCAGAAGAAATTCTAGCAATTAAGTATGTGGAACAC
117722_4941336_HYDIN_63_1_1	AAACCTAACAGTATCCTGAAACCTGATTACCAGCCCTTGGCCATAAAGAACATTTCCACCCTGCCCGTGAACTTGTTGCTGTCAACATCTGGACCCTTCTTTATATGTGAGACTGATAAA
117722_4941337_HYDIN_64_1_1	ATAGTGAAAGAGAAGCTGGTGTGCCACGCCATCATCGGGGCACAGAAGGGGAAGAGCTTGGTGATGGCTGTGAACATCACCTGTGAGTTCGTCGCACCTCTCATCCAGCTCTCCACCAAG
117722_4941338_HYDIN_65_1_1	CCTGGATACCCACTATTACCACTTTAAGTTGATCAACAAGGGACGTCGGATCCAACAGTTGTTCTGGATGAATGATAGCTTCCGACCCCAGGCCAAGCTGAGTAAGAAGGGCCGGGTTAA
117722_4941339_HYDIN_66_1_1	GCACACAAAAAATCCCTTTGGACGATTGAACCCAATGAAGGCATGGTTCCTCCAGAAACTGATGTTCAACTGGCACTGACCGCCAACCTGAATGACACACTGACATTCAAGGACTGTGTT
117722_4941340_HYDIN_67_1_1	GTATGTCACTTAAAGAGCGCTGGAGAAGGCCCAGTTATCTACGTCCATCCCAATCAAGTGGACTTCGGGAATATCTACGTCCTAAAAGACTCTTCCAGGATTCTCAACCTATGCAACCAG
117722_4941341_HYDIN_68_1_1	GTGTGTGAGGAGGTGCCTACTGTGCTGTTTTCCAGCCCCACCCCCAGCGGGGTCATCTCCCCAAGCAGCACCATCCACATACCACTGGTCCTGGAGACCCAGGTCACTGGAGAACACAGA
117722_4941342_HYDIN_69_1_1	GTGTGTTGTACCTGCCCTCCACCTGGTCAATACAGAGGTGGACTTTGGGCACTGCTTCCTGAAGTACCCGTATGAGAAAACACTCCAGCTTGCCAATCAAGATGACCTCCCAGGATTCTA
117722_4941343_HYDIN_71_1_1	GGTTTCCTCATACCTTGATATGTTCCCTCAATAATACCTCTTTGATCCCCATGACTTACAAACTGCGTATCCCTGGGGATGGCCTTGGCCATAAAAGCATTTCATATTGTGAGCAGCATG
117722_4941344_HYDIN_73_1_1	GCGATACTGTACAACAAAGGCAGCATCGATGCTCTCTTCAACATGACCCCTCCAACTTCAGCTTTGGGGGCCTGCTTTGTTTTCAGTCCCAAGGAAGGCATCATTGAACCAAGTGGAGTC
117722_4941345_HYDIN_76_1_1	GGCCTGTGATGATCTGATCAAAGAGGAGAAGGATGAGACTGATGAGTTTTTTGAAGAGTGCATTACTGATCCTTTACTCCGAGAACATCTTTCTGTTCTGTCCCGAACCTTTGCGAATCA
117722_4941346_HYDIN_77_1_1	GTGAAAAGGTGTTTGTATCTCTCTATGGAGCTGCCATAGACATGAATATAAGGCTGGATAAGAATTCCTTGACCATCGAGAAAACCTACATATCTCTGGCCAATCAGCGAACTATAACCA
117722_4941347_HYDIN_78_1_1	GCCTTTCTCTATAGAACCAGCTATTGGAACTCTTAATGTGGGAGAGTCCATGCAACTGGAAGTGGAGTTTGAGCCACAGAGTGTGGGCGATCACAGTGGAAGACTTATCGTGTGTTATGA
117722_4941348_HYDIN_79_1_1	GATTACGCCCATACGTTGACCTGTGTTACTGAAAGAGAAAAGTTTATTGTACCCATCAAAGCTAGAGGGGCACGAGCCATTCTCGATTTTCCTGACAAGCTGAATTTTTCCACTTGTCCT
117722_4941285_HYDIN_6_1_3	CTGCTGCCAGGCCCTGGAGATCTCACTGGACCAGGAACATATTCCCTTTGGACCCGTGGTGTATCAGACGCAAGCCACACGTCGCATCCTCATGATGAACACAGGCGATGTGGGTGCAAG
117722_4941299_HYDIN_21_1_3	AGGATGACATCACCTTGGACAACATCCATGGACTGGTGGCCCCCACCAGCCAGGAAGACATAAGTATCTCTGAGTTCACAGAGATCATCGAGGACAATGATATGGAAGACTTGGTGGCAG
117722_4941313_HYDIN_39_1_3	CCCCGAAGTTTAAGACCTATGAATTGACACTGAAGGATGTCCAGAACATCCTCATGTACTGGGACCGGAAGCAAGGAGTCCAGCTGCCTCCTGCAGGGATGGAGGAAGCGCCCCATGAGC
117722_4941335_HYDIN_62_1_3	TTTTGGCTGCATCCTGAACGATACTGAGCTCATTCGCTACGTTACCATCACCAACTGCAGTCCGTTGGTTGTGAAGTTTCGCTGGTTCTTCTTGGTGAATGATGAGGAAAATCAGATAAG
117722_4941338_HYDIN_65_1_3	GGCTCTCAGGAGCCCAGGGATCCACAGAGCCCCGTGTTTCATCTCCACCCCGCCAGCATGGAGCTGTACCCAGGCCAGGCAATTGATGTGATACTCGAAGGCTATTCTGCTACTCCCAGG
117722_4941313_HYDIN_39_1_4	GAGGAAGCGCCCCATGAGCCCGACGACCAGCGCCAGGTCCCCTTGGGTGGGCGCAGGGGCCGCAAGGACCGGGAGAGAGAGCGCCTGGAGAAGGAGCGCACGGAGAAGGAGCGCCTGGAG
117722_4941313_HYDIN_39_1_5	GGAGAAGGAGCGCCTGGAGAGGGAGAAGGCGGAGCGGGAGCGCCTGGAGAAGCTGCGAGCCCTGGAGGAGCGGAGCGACTGGGAGGGGGAAGGGGAGGAGGACCACGAAGGGAAGAAGGA
117722_4941313_HYDIN_39_1_6	ACCACGAAGGGAAGAAGGAGAAGGACCTGGGCGTACCCTTCCTAGACATCCAGACACCAGACTTTGAAGGCTTGAGCTGGAAGCAGGCCCTAGAGAGCGACAAGCTTCCCAAAGGAGAGC
117722_4941349_ROCK1_1_1_1	TAAGTTATGATGTAACATCAGCAAGAGATATGCTGCTGTTAGCATGTTCTCAGGATGAACAAAAAAAATGGGTAACTCATTTAGTAAAGAAAATCCCTAAGAATCCACCATCTGGTTTTG
117722_4941349_ROCK1_1_1_2	GAAAATCCCTAAGAATCCACCATCTGGTTTTGTTCGTGCTTCCCCTCGAACGCTTTCTACAAGATCCACTGCAAATCAGTCTTTCCGGAAAGTGGTCAAAAATACATCTGGAAAAACTAG
117722_4941350_ROCK1_2_1_1	ATACTATATGCAAATGAAGGTGAATGTAGAAAAGATGTAGAGATGGAACCAGTACAACAAGCTGAAAAAACTAATTTCCAAAATCACAAAGGCCATGAGTTTATTCCTACACTCTACCAC
117722_4941350_ROCK1_2_1_2	TAATTTCCAAAATCACAAAGGCCATGAGTTTATTCCTACACTCTACCACTTTCCTGCCAATTGTGATGCCTGTGCCAAACCTCTCTGGCATGTTTTTAAGCCACCCCCTGCCCTAGAGTG
117722_4941350_ROCK1_2_1_3	GTGCCAAACCTCTCTGGCATGTTTTTAAGCCACCCCCTGCCCTAGAGTGTCGAAGATGCCATGTTAAGTGCCACAGAGATCACTTAGATAAGAAAGAGGACTTAATTTGTCCATGTAAAG
117722_4941351_ADNP_1_1_1	GACTATCGGACAAAACCTTTCTGCTGCAGCGCTTGTCCATTTTCCTCAAAATTCTTCTCTGCCTACAAAAGTCATTTCCGCAATGTCCATAGTGAAGACTTTGAAAATAGGATTCTCCTT
117722_4941351_ADNP_1_1_2	CCTTAATTGCCCCTACTGTACCTTCAATGCAGACAAAAAGACTTTGGAAACACACATTAAAATATTTCATGCTCCGAACGCCAGCGCACCAAGTAGCAGCCTCAGCACTTTCAAAGATAA
117722_4941351_ADNP_1_1_3	ATAAAAACAAAAATGATGGCCTTAAACCTAAGCAGGCTGACAGTGTAGAGCAAGCTGTTTATTACTGTAAGAAGTGCACTTACCGAGATCCTCTTTATGAAATAGTTAGGAAGCACATTT
117722_4941351_ADNP_1_1_4	ATTTACAGGGAACATTTTCAGCATGTGGCAGCACCTTACATAGCAAAGGCAGGAGAAAAATCACTCAATGGGGCAGTCCCCTTAGGCTCGAATGCCCGAGAAGAGAGTAGTATTCACTGC
117722_4941351_ADNP_1_1_5	CTGCAAGCGATGCCTTTTCATGCCAAAGTCCTATGAAGCTTTGGTACAGCATGTCATCGAAGACCATGAACGTATAGGCTATCAGGTCACTGCCATGATTGGGCACACAAATGTAGTGGT
117722_4941351_ADNP_1_1_6	TGGTTCCCCGATCCAAACCCTTGATGCTAATTGCTCCCAAACCTCAAGACAAGAAGAGCATGGGACTCCCACCAAGGATCGGTTCCCTTGCTTCTGGAAATGTCCGGTCTTTACCATCAC
117722_4941351_ADNP_1_1_7	TCACAGCAGATGGTGAATCGACTCTCAATACCAAAGCCTAACTTAAATTCTACAGGAGTCAACATGATGTCCAGTGTTCATCTGCAGCAGAACAACTATGGAGTCAAATCTGTAGGCCAG
117722_4941351_ADNP_1_1_8	CCAGGGTTACAGTGTTGGTCAGTCAATGAGACTGGGTCTAGGTGGCAACGCACCAGTTTCCATTCCTCAACAATCTCAGTCTGTAAAGCAGTTACTTCCAAGTGGAAACGGAAGGTCTTA
117722_4941351_ADNP_1_1_9	CTTATGGGCTTGGGTCAGAGCAGAGGTCCCAGGCACCAGCAAGATACTCCCTGCAGTCTGCTAATGCCTCTTCTCTCTCATCGGGCCAGTTAAAGTCTCCTTCCCTCTCTCAGTCACAGG
117722_4941351_ADNP_1_1_10	CAGGCATCCAGAGTGTTAGGTCAGTCCAGTTCCAAACCTGCTGCAGCTGCCACAGGCCCTCCCCCAGGTAACACTTCCTCAACTCAAAAGTGGAAAATATGTACAATCTGTAATGAGCTT
117722_4941351_ADNP_1_1_11	GCTTTTTCCTGAAAATGTCTATAGTGTGCACTTCGAAAAAGAACATAAAGCTGAGAAAGTCCCAGCAGTAGCCAACTACATTATGAAAATACACAATTTTACTAGCAAATGCCTCTACTG
117722_4941351_ADNP_1_1_12	ACTGTAATCGCTATTTACCCACAGATACTCTGCTCAACCATATGTTAATTCATGGTCTGTCTTGTCCATATTGCCGTTCAACTTTCAATGATGTGGAAAAGATGGCCGCACACATGCGGA
117722_4941351_ADNP_1_1_13	CGGATGGTTCACATTGATGAAGAGATGGGACCTAAAACAGATTCTACTTTGAGTTTTGATTTGACATTGCAGCAGGGTAGTCACACTAACATCCATCTCCTGGTAACTACATACAATCTG
117722_4941351_ADNP_1_1_14	TCTGAGGGATGCCCCAGCTGAATCTGTTGCTTACCATGCCCAAAATAATCCTCCAGTTCCTCCAAAGCCACAGCCAAAGGTTCAGGAAAAGGCAGATATCCCTGTAAAAAGTTCACCTCA
117722_4941351_ADNP_1_1_15	CTCAAGCTGCAGTGCCCTATAAAAAAGATGTTGGGAAAACCCTTTGTCCTCTTTGCTTTTCAATCCTAAAAGGACCCATATCTGATGCACTTGCACATCACTTACGAGAGAGGCACCAAG
117722_4941351_ADNP_1_1_16	CAAGTTATTCAGACGGTTCATCCAGTTGAGAAAAAGCTCACCTACAAATGTATCCATTGCCTTGGTGTGTATACCAGCAACATGACCGCCTCAACTATCACTCTGCATCTAGTTCACTGC
117722_4941351_ADNP_1_1_17	CTGCAGGGGCGTTGGAAAGACCCAAAATGGCCAGGATAAGACAAATGCACCCTCTCGGCTTAATCAGTCTCCAAGTCTGGCACCTGTGAAGCGCACTTACGAGCAAATGGAATTTCCCTT
117722_4941351_ADNP_1_1_18	CCTTACTGAAAAAACGAAAGTTAGATGATGATAGTGATTCACCCAGCTTCTTTGAAGAGAAGCCTGAAGAGCCTGTTGTTTTAGCTTTAGACCCCAAGGGTCATGAAGATGATTCCTATG
117722_4941351_ADNP_1_1_19	TATGAAGCCAGGAAAAGCTTTCTAACAAAGTATTTCAACAAACAGCCCTATCCCACCAGGAGAGAAATTGAGAAGCTAGCAGCCAGTTTATGGTTATGGAAGAGTGACATCGCTTCCCAT
117722_4941352_DYRK1A_4_1_1	GTTGTAAAGGCATATGATCGTGTGGAGCAAGAATGGGTTGCCATTAAAATAATAAAGAACAAGAAGGCTTTTCTGAATCAAGCACAGATAGAAGTGCGACTTCTTGAGCTCATGAACAAA
117722_4941352_DYRK1A_4_1_2	AAGAATGGGTTGCCATTAAAATAATAAAGAACAAGAAGGCTTTTCTGAATCAAGCACAGATAGAAGTGCGACTTCTTGAGCTCATGAACAAACATGACACTGAAATGAAATACTACATAG
117722_4941353_DYRK1A_1_1_1	GAGGAGAGACTTCAGCATGCAAACCTTCATCTGTTCGGCTTGCACCGTCATTTTCATTCCATGCTGCTGGCCTTCAGATGGCTGGACAGATGCCCCATTCACATCAGTACAGTGACCGTC
117722_4941353_DYRK1A_1_1_2	ATGGCTGGACAGATGCCCCATTCACATCAGTACAGTGACCGTCGCCAGCCAAACATAAGTGACCAACAGGTTTCTGCCTTATCATATTCTGACCAGATTCAGCAACCTCTAACTAACCAG
117722_4941354_DYRK1A_2_1_1	TGATGCCTGATATTGTCATGTTACAGAGGCGGATGCCCCAAACCTTCCGTGACCCAGCAACTGCTCCCCTGAGAAAACTTTCTGTTGACTTGATCAAAACATACAAGCATATTAATGAG
117722_4941355_DYRK1A_3_1_1	GTTTACTATGCAAAAAAGAAGCGAAGACACCAACAGGGCCAGGGAGACGATTCTAGTCATAAGAAGGAACGGAAGGTTTACAATGATGGTTATGATGATGATAACTATGATTATATTGTA
117722_4941355_DYRK1A_3_1_2	CGGAAGGTTTACAATGATGGTTATGATGATGATAACTATGATTATATTGTAAAAAACGGAGAAAAGTGGATGGATCGTTACGAAATTGACTCCTTGATAGGCAAAGGTTCCTTTGGACAG
117722_4941356_DYRK1A_5_1_1	TGCATTTGAAACGCCACTTTATGTTTCGAAACCATCTCTGTTTAGTTTTTGAAATGCTGTCCTACAACCTCTATGACTTGCTGAGAAACACCAATTTCCGAGGGGTCTCTTTGAACCTAA
117722_4941356_DYRK1A_5_1_2	GAAACACCAATTTCCGAGGGGTCTCTTTGAACCTAACACGAAAGTTTGCGCAACAGATGTGCACTGCACTGCTTTTCCTTGCGACTCCAGAACTTAGTATCATTCACTGTGATCTAAAAC
117722_4941356_DYRK1A_5_1_3	CTCCAGAACTTAGTATCATTCACTGTGATCTAAAACCTGAAAATATCCTTCTTTGTAACCCCAAACGCAGTGCAATCAAGATAGTTGACTTTGGCAGTTCTTGTCAGTTGGGGCAGAGG
117722_4941357_DYRK1A_6_1_1	ATATACCAGTATATTCAGAGTCGCTTTTATCGGTCTCCAGAGGTGCTACTGGGAATGCCTTATGACCTTGCCATTGATATGTGGTCCCTCGGGTGTATTTTGGTTGAAATGCACACTGGA
117722_4941357_DYRK1A_6_1_2	TATCGGTCTCCAGAGGTGCTACTGGGAATGCCTTATGACCTTGCCATTGATATGTGGTCCCTCGGGTGTATTTTGGTTGAAATGCACACTGGAGAACCTCTGTTCAGTGGTGCCAATGAG
117722_4941358_DYRK1A_7_1_1	GTAGATCAGATGAATAAAATAGTGGAAGTTCTGGGTATTCCACCTGCTCATATTCTTGACCAAGCACCAAAAGCAAGAAAGTTCTTTGAGAAGTTGCCAGATGGCACTTGGAACTTAAAG
117722_4941358_DYRK1A_7_1_2	GTGGAAGTTCTGGGTATTCCACCTGCTCATATTCTTGACCAAGCACCAAAAGCAAGAAAGTTCTTTGAGAAGTTGCCAGATGGCACTTGGAACTTAAAGAAGACCAAAGATGGAAAACGG
117722_4941359_DYRK1A_8_1_1	GAGTACAAACCACCAGGAACCCGTAAACTTCATAACATTCTTGGAGTGGAAACAGGAGGACCTGGTGGGCGACGTGCTGGGGAGTCAGGTCATACGGTCGCTGACTACTTGAAGTTCAAA
117722_4941359_DYRK1A_8_1_2	CGGTCGCTGACTACTTGAAGTTCAAAGACCTCATTTTAAGGATGCTTGATTATGACCCCAAAACTCGAATTCAACCTTATTATGCTCTGCAGCACAGTTTCTTCAAGAAAACAGCTGATG
117722_4941359_DYRK1A_8_1_3	CAGTTTCTTCAAGAAAACAGCTGATGAAGGTACAAATACAAGTAATAGTGTATCTACAAGCCCCGCCATGGAGCAGTCTCAGTCTTCGGGCACCACCTCCAGTACATCGTCAAGCTCAG

## Sheet: Table S2b
Table S2b. HSD2 probe design sequences
SequenceName	Sequence
176360_8716475_GNRHR2_2_1_1	CTGTTCCTGTTCCACACGGTCCACTGAGCTGGCCCAGTCCCTTTCACTCAGTGTGTCACCAAAGGCAGCTTCAAGGCTCAATGGCAAGAGACCACCTATAACCTCTTCACCTTCTGCTGC
176360_8716475_GNRHR2_2_1_2	CCACCTATAACCTCTTCACCTTCTGCTGCCTCTTTCTGCTGCCACTGACTGCCATGGCCATCTGCTATAGCCGCATTGTCCTCAGTGTGTCCAGGCCCCAGACAAGGAAGGGGAGCCATG
176360_8716476_RBM8_1_1_1	ATGGCGGACGTGCTAGATCTTCACGAGGCTGGGGGCGAAGATTTCGCCATGGATGAGGATGGGGACGAGAGCATTCACAAACTGAAAGAAAAAGCGAAGAAACGGAAGGGTCGCGGCTTT
176360_8716476_RBM8_1_1_2	ACGGAAGGGTCGCGGCTTTGGCTCCGAAGAGGGGTCCCGAGCGCGGATGCGTGAGGATTATGACAGCGTGGAGCAGGATGGCGATGAACCCGGACCACAACGCTCTGTTGAAGGCTGGAT
176360_8716476_RBM8_1_1_3	GCTCTGTTGAAGGCTGGATTCTCTTTGTAACTGGAGTCCATGAGGAAGCCACCGAAGAAGACATACACGACAAATTCGCAGAATATGGGGAAATTAAAAACATTCATCTCAACCTCGACA
176360_8716476_RBM8_1_1_4	ATTCATCTCAACCTCGACAGGCGAACAGGATATCTGAAGGGGTATACTCTAGTTGAATATGAAACATACAAGGAAGCCCAGGCTGCTATGGAGGGACTCAATGGCCAGGATTTGATGGGA
176360_8716476_RBM8_1_1_5	TGGCCAGGATTTGATGGGACAGCCCATCAGCGTTGACTGGTGTTTTGTTCGGGGTCCACCAAAAGGCAAGAGGAGAGGTGGCCGAAGACGCAGCAGAAGTCCAGACCGGAGACGTCGCTG
176360_8716477_FCGR1A_1_1_1	TTCTAATTTGGCTCTGGAGCCACCAGCAGAACCTCTTCAATATCTTGCATGTTACAGATTTCACTGCTCCCACCAGCTTGGAGACAACATGTGGTTCTTGACAACTCTGCTCCTTTGGG
176360_8716478_FCGR1A_4_1_1	GCTGGCTACTACTGCAGGTCTCCAGCAGAGTCTTCACGGAAGGAGAACCTCTGGCCTTGAGGTGTCATGCGTGGAAGGATAAGCTGGTGTACAATGTGCTTTACTATCGAAATGGCAAAG
176360_8716478_FCGR1A_4_1_2	GGCAAAGCCTTTAAGTTTTTCCACTGGAATTCTAACCTCACCATTCTGAAAACCAACATAAGTCACAATGGCACCTACCATTGCTCAGGCATGGGAAAGCATCGCTACACATCAGCAGGA
176360_8716478_FCGR1A_4_1_3	AGCAGGAATATCTGTCACTGTGAAAGAGCTATTTCCAGCTCCAGTGCTGAATGCATCTGTGACATCCCCACTCCTGGAGGGGAATCTGGTCACCCTGAGCTGTGAAACAAAGTTGCTCTT
176360_8716478_FCGR1A_4_1_4	TGCTCTTGCAGAGGCCTGGTTTGCAGCTTTACTTCTCCTTCTACATGGGCAGCAAGACCCTGCGAGGCAGGAACACATCCTCTGAATACCAAATACTAACTGCTAGAAGAGAAGACTCTG
176360_8716478_FCGR1A_4_1_5	GACTCTGGGTTATACTGGTGCGAGGCTGCCACAGAGGATGGAAATGTCCTTAAGCGCAGCCCTGAGTTGGAGCTTCAAGTGCTTGGCCTCCAGTTACCAACTCCTGTCTGGTTTCATGTC
176360_8716478_FCGR1A_4_1_6	TCATGTCCTTTTCTATCTGGCAGTGGGAATAATGTTTTTAGTGAACACTGTTCTCTGGGTGACAATACGTAAAGAACTGAAAAGAAAGAAAAAGTGGGATTTAGAAATCTCTTTGGATTC
176360_8716479_HIST2H2BF_1_1_1	GGTAGTTCGGATTACTTCTTTAAGTCTCTTTTCTCTTTTTTCGCGCAAAAATGCCGGATCCAGCGAAATCCGCTCCTGCTCCCAAGAAGGGCTCCAAAAAGGCTGTTACGAAAGTGCAGA
176360_8716479_HIST2H2BF_1_1_2	CTGTTACGAAAGTGCAGAAGAAGGACGGCAAGAAGCGCAAGCGCAGCCGCAAGGAGAGCTACTCCGTTTACGTGTACAAGGTGCTGAAGCAGGTCCACCCCGACACCGGCATCTCGTCCA
176360_8716479_HIST2H2BF_1_1_3	ACACCGGCATCTCGTCCAAGGCCATGGGCATCATGAACTCCTTCGTCAACGACATCTTCGAGCGCATCGCGGGAGAGGCGTCCCGCCTGGCGCACTACAACAAGCGCTCCACCATCACAT
176360_8716479_HIST2H2BF_1_1_4	AGCGCTCCACCATCACATCCCGCGAGATCCAGACGGCCGTGCGCCTGCTGCTGCCCGGCGAGCTGGCCAAGCACGCCGTGTCCGAGGGCACCAAGGCGGTCACCAAGTACACCAGCTCGA
176360_8716480_HIST2H3D_1_1_1	ATGGCCCGTACTAAGCAGACTGCCCGCAAGTCGACCGGCGGCAAGGCCCCGAGGAAGCAGCTGGCTACCAAAGCGGCCCGCAAGAGCGCGCCGGCCACGGGCGGGGTGAAGAAGCCGCAC
176360_8716480_HIST2H3D_1_1_2	CGGGCGGGGTGAAGAAGCCGCACCGCTACCGGCCCGGCACCGTGGCTCTGCGGGAGATCCGGCGCTACCAGAAGTCTACGGAGCTGCTGATCCGCAAGCTGCCCTTCCAGCGGCTGGTAC
176360_8716480_HIST2H3D_1_1_3	GCTGCCCTTCCAGCGGCTGGTACGCGAGATCGCGCAGGACTTTAAGACGGACCTGCGCTTCCAGAGCTCGGCCGTGATGGCGCTGCAGGAGGCCAGCGAGGCCTACCTGGTGGGGCTGTT
176360_8716480_HIST2H3D_1_1_4	GAGGCCTACCTGGTGGGGCTGTTCGAAGACACGAACCTGTGCGCCATCCATGCCAAGCGCGTGACCATCATGCCCAAGGACATCCAGTTGGCCCGCCGCATCCGCGGGGAGCGGGCCTA
176360_8716481_LINC00152_1_1_1	GTGCGCCTTTTTTTTTTTTTCCTTCTTAGTCGTGTGTACATCATTGGGAATGGAGGGAAATAAATGACTGGATGGTCGCTGCTTTTTAAGTTTCAAATTGACATTCCAGACAAGCGGTGC
176360_8716481_LINC00152_1_1_2	ATGGTCGCTGCTTTTTAAGTTTCAAATTGACATTCCAGACAAGCGGTGCCTGAGCCCGTGCCTGTCTTCAGATCTTCACAGCACAGTTCCTGGGAAGGTGGAGCCACCAGCCTCTCCTTG
176360_8716482_LINC00152_2_1_1	AATAACTGGGAGATGAAACAGGAAGCTCTATGACACACTTGATCGAATATGACAGACACCGAAAATCACGACTCAGCCCCCTCCAGCACCTCTACCTGTTGCCCGCCGATCACAGCCGGA
176360_8716482_LINC00152_2_1_2	TACCTGTTGCCCGCCGATCACAGCCGGAATGCAGCTGAAAGATTCCCTGGGGCCTGGTTCCAACCGCCCACTGTGGACTCTGAGGCCTCTGCATTTGCGGGTGGTCTGCCTGTGATATTT
176360_8716482_LINC00152_2_1_3	ATTTGCGGGTGGTCTGCCTGTGATATTTTGGTCATGGGCTGGTCTGGTCGGTTTCCCATTTGTCTGGCCAGTCTCTATGTGTCTTAATCCCTTGTCCTTCATTAAAAGCAAAACTAAAGA
176360_8716483_ANAPC1_1_1_1	ATGTCGAACTTCTATGAAGAAAGGACAACGATGATTGCAGCAAGGGATTTGCAGGAATTTGTTCCTTTTGGTCGAGACCACTGCAAGCACCACCCTAATGCTTTGAACCTTCAACTTCGC
176360_8716483_ANAPC1_1_1_3	TAAGTGAAATTGGAGAAGATGTGGACTATGATGAGGAACTCTATGTTGCTGGAAATATGGTGATATGGAGCAAAGGAAGTAAAAGCCAGGCATTGGCAGTTTATAAAGCATTTACAGTTG
176360_8716483_ANAPC1_1_1_5	TAACATGCATAGCATAGAAGGAAAGGATTACATAGCTTCATTACCATTTCAGGTTGCAAATGTTTGGCCCACTAAATATGGATTGCTGTTTGAACGAAGCGCTTCTTCACATGAAGTACC
176360_8716483_ANAPC1_1_1_7	GTTGTAGATCATGCAATGAAAATTGTTTTCCTCAATACTGACCCCTCTATTGTAATGACTTATGATGCTGTTCAAAATGTGCATTCTGTGTGGACTCTCCGGAGAGTCAAATCAGAGGAA
176360_8716483_ANAPC1_1_1_9	CTTTCCAGAATTACTCCTCCATTCACAGCCAGAGTCGCTCAACCTCATCACCCAGTCTACATTCTCGCTCACCTTCTATTTCCAACATGGCAGCTCTAAGTCGTGCTCATTCTCCTGCGT
176360_8716483_ANAPC1_1_1_11	ACCAGAAACGGAGCCAATTGTTCCTGAACTGTGTATTGACCATTTGTGGACAGAAACGATTACTAATATAAGAGAGAAAAATTCACAAGCCTCAAAAGTGTTTATTACATCTGACCTATG
176360_8716483_ANAPC1_1_1_13	AAGGATGCAGCACCAGTGGAGAAAATAGACACCATGCTGGTCTTGGAAGGCAGTGGAAACCTGGTGCTATACACAGGAGTGGTTCGGGTGGGAAAGGTTTTTATTCCTGGACTGCCAGCT
176360_8716483_ANAPC1_1_1_15	CAGTTCCAGAACTGAGGGATTCTTCAAAACTTCATGATTCTCTCTATAATGAGGATTGTACTTTCCAACAGCTTGGAACTTACATTCATTCTATCAGAGATCCTGTCCATAACAGAGTCA
176360_8716483_ANAPC1_1_1_17	TCAGATGCTTGTCAAGTGGTACAATGTCCACAGTGCTCCAGGAGGACCCAGTTATCACTCAGAGTGGAATTTATTTGTGACTTGTCTCATGAACATGATGGGTTATAACACAGACCGCTT
176360_8716483_ANAPC1_1_1_19	TACCACCAGAATGTTGAGTCTCATCTTTTGAACAGATCTTTATGTCTGAGTCCTTCAGAAGCTTCACAGATGAAGGATGAGGATTTTTCACAGAATCTCAGTCTGGATTCTTCTACACTT
176360_8716483_ANAPC1_1_1_21	CAAGGGACTTAAAATTGGGGCCTTATGTAGATCATTACTATAGAGACTACCCAACGCTTGTCAGAACTACTGGACAAGTGTGCACAATTGATCCAGGTCAAACAGGATTTATGCATCATC
176360_8716483_ANAPC1_1_1_23	AGTCTTGAGTATTGCACTGTACATACTTGGTGATGAGAGCTTGGTTTCTGATGAATCCTCACAGTATTTAACCAGAATAACTATAGCCCCCCAGAAGTTGCAAGTAGAACAAGAGGAAAA
176360_8716483_ANAPC1_1_1_25	CTTCCCATCAGAGATGCAATTTATCACTGTCGTGAGCAGCCTGCCTCAGACTGGCCAGAAGCTGTCTGTCTCTTGATTGGACGTCAGGATCTTTCCAAGCAGGCCTGCGAAGGAAACTTA
176360_8716483_ANAPC1_1_1_27	TAAGGGTGCAGGATGTGCGAAGGCTTCTTCAGAGTGCGCATCCTGTCCGTGTCAACGTAGTGCAGTACCCAGAGCTCAGTGACCACGAGTTCATCGAGGAAAAGGAAAACAGATTGCTCC
176360_8716483_ANAPC1_1_1_29	CCCTCCTCGGAACACAACAGTAGACCTTAATAGTGGAAACATCGATGTGCCTCCCAACATGACAAGCTGGGCCAGCTTTCATAATGGTGTGGCTGCTGGCCTGAAGATAGCTCCTGCCTC
176360_8716483_ANAPC1_1_1_31	CTCAATATCCATGACTACTTGACCAAGGGCCATGAAATGACAAGCATTGGACTGCTACTTGGTGTTTCTGCTGCAAAACTAGGCACCATGGATATGTCTATTACTCGGCTTCTTAGCATT
176360_8716483_ANAPC1_1_1_33	CAGAAGTCCTGTTGGCTGAGATAGGACGGCCTCCTGGTCCTGAAATGGAATACTGCACTGACAGAGAGTCATACTCCTTAGCTGCTGGCTTGGCCCTGGGCATGGTCTGCTTGGGGCATG
176360_8716483_ANAPC1_1_1_35	TTATCAAATCAAAGAAGGAGATACCATAAATGTGGATGTGACTTGTCCAGGTGCTACTCTAGCTTTGGCTATGATCTACTTAAAAACCAATAACAGATCTATTGCAGATTGGCTCCGAGC
176360_8716483_ANAPC1_1_1_38	CTGCTTGTCTCTGGGTTTTCGATTTGCTGGCTCAGAAAACTTATCAGCATTTAACTGTTTGCATAAATTTGCCAAAGATTTTATGACTTATTTGTCCGCACCTAATGCTTCTGTTACAGG
176360_8716483_ANAPC1_1_1_41	CCTTTATCCGCACTTCCCAGCTCACAGCACTGACAACCGGTATCATCTCCAGGCTCTCCGGCACCTCTATGTGCTGGCCGCGGAGCCCAGGCTTCTAGTGCCTGTGGATGTGGACACAAA
176360_8716483_ANAPC1_1_1_44	CTCCTACAAAGAAGATCCAATGGGATGGCAAAGTTTGTTGGCTCAGACTGTTGCTAACAGGAACTCTGAAGCCCGGGCTTTCAAGCCAGAAACAATCTCAGCATTCACTTCTGATCCAGC
176360_8716483_ANAPC1_1_1_47	CCATCAGGAGCGGCTGCAGAACCACCCTAAGCGGGGGCTCTTTATGAACTCGGAATTCCTCCCTGTTGTGAAGTGCACCATTGATAATACCCTGGACCAGTGGCTACAAGTCGGGGGTGA
176360_8716484_OCLN_1_1_1	ATGTCATCCAGGCCTCTTGAAAGTCCACCTCCTTACAGGCCTGATGAATTCAAACCGAATCATTATGCACCAAGCAATGACATATATGGTGGAGAGATGCATGTTCGACCAATGCTCTCT
176360_8716485_OCLN_2_1_3	TCTGGATCTCTATATGGTTCACAAATATATGCCCTCTGCAACCAATTTTATACACCTGCAGCTACTGGACTCTACGTGGATCAGTATTTGTATCACTACTGTGTTGTGGATCCCCAGGAG
176360_8716486_OCLN_3_1_2	AACACATTTATGATGAGCAGCCCCCCAATGTCGAGGAGTGGGTTAAAAATGTGTCTGCAGGCACACAGGACGTGCCTTCACCCCCATCTGACTATGTGGAAAGAGTTGACAGTCCCATGG
176360_8716486_OCLN_3_1_3	CATACTCTTCCAATGGCAAAGTGAATGACAAGCGGTTTTATCCAGAGTCTTCCTATAAATCCACGCCGGTTCCTGAAGTGGTTCAGGAGCTTCCATTAACTTCGCCTGTGGATGACTTCA
176360_8716486_OCLN_3_1_4	GGCAGCCTCGTTACAGCAGCGGTGGTAACTTTGAGACACCTTCAAAAAGAGCACCTGCAAAGGGAAGAGCAGGAAGGTCAAAGAGAACAGAGCAAGATCACTATGAGACAGACTACACAA
176360_8716486_OCLN_3_1_5	CTGGCGGCGAGTCCTGTGATGAGCTGGAGGAGGACTGGATCAGGGAATATCCACCTATCACTTCAGATCAACAAAGACAACTGTACAAGAGGAATTTTGACACTGGCCTACAGGAATACA
176360_8716486_OCLN_3_1_6	AGAGCTTACAATCAGAACTTGATGAGATCAATAAAGAACTCTCCCGTTTGGATAAAGAATTGGATGACTATAGAGAAGAAAGTGAAGAGTACATGGCTGCTGCTGATGAATACAATAGAC
176360_8716486_OCLN_3_1_7	TGAAGCAAGTGAAGGGATCTGCAGATTACAAAAGTAAGAAGAATCATTGCAAGCAGTTAAAGAGCAAATTGTCACACATCAAGAAGATGGTTGGAGACTATGATAGACAGAAAACATAG
176360_8716487_GTF2H2_1_1_1	TTGTTGGAATACTTTGTAGAGGAATATTTTGATCAAAATCCTATTAGTCAGATTGGAATAATTGTAACTAAGAGTAAAAGAGCTGAAAAATTGACTGAACTTTCAGGAAACCCAAGAAAA
176360_8716487_GTF2H2_1_1_2	AAAACATATAACGTCTTTGAAGAAAGCTGTGGATATGACCTGCCATGGAGAGCCATCTCTTTATAATTCCCTAAGCATGGCTATGCAGACTCTAAAACACATGCCTGGACATACAAGTCG
176360_8716487_GTF2H2_1_1_3	GTCGAGAAGTACTAATCATCTTTAGCAGCCTTACAACTTGCGATCCATCTAATATTTATGATCTAATCAAGACCCTAAAGGCAGCTAAAATTAGAGTATCTGTTACTGGATTGTCTGCAG
176360_8716487_GTF2H2_1_1_5	TAGCTCAAGTTCTGAATGCTCACTTATTCGTATGGGATTTCCTCAGCACACCATTGCTTCTTTATCTGACCAGGATGCAAAACCCTCTTTCAGCATGGCGCATTTGGATGGCAATACTGA
176360_8716487_GTF2H2_1_1_7	GCACGGTCTTACCATCATTTGTTTCCTTTGGATGCTTTTCAAGAAATTCCCCTAGAAGAATATAATGGAGAAAGATTTTGTTATGGATGTCAGGGGGAATTGAAAGACCAACATGTTTAT
176360_8716487_GTF2H2_1_1_8	TTATGTTTGTGCTGTGTGCCAAAATGTTTTCTGTGTGGACTGTGATGTTTTTGTTCATGATTCTCTACACTGTTGCCCTGGCTGTATTCATAAGATTCCAGCTCCTTCAGGTGTTTGA
176360_8716488_SERF1_1_1_1	GTGGAAATCAACGAGAACTTGCCCGCCAGAAAAACATGAAGAAAACCCAGGAAATTAGCAAGGGAAAGAGGAAAGAGGATAGCTTGACTGCCTCTCAGAGAAAGCAGAGGGACTCTGAGA
176360_8716488_SERF1_1_1_2	GGAAAGAGGAAAGAGGATAGCTTGACTGCCTCTCAGAGAAAGCAGAGGGACTCTGAGATCATGCAAGAAAAGCAGAAGGCAGCTAATGAGAAGAAGTCTATGCAGACAAGAGAAAAGTGA
176360_8716489_SMN1_1_1_1	ATGGCGATGAGCAGCGGCGGCAGTGGTGGCGGCGTCCCGGAGCAGGAGGATTCCGTGCTGTTCCGGCGCGGCACAGGCCAGAGCGATGATTCTGACATTTGGGATGATACAGCACTGATA
176360_8716489_SMN1_1_1_2	GGATGATACAGCACTGATAAAAGCATATGATAAAGCTGTGGCTTCATTTAAGCATGCTCTAAAGAATGGTGACATTTGTGAAACTTCGGGTAAACCAAAAACCACACCTAAAAGAAAACC
176360_8716489_SMN1_1_1_3	CCACACCTAAAAGAAAACCTGCTAAGAAGAATAAAAGCCAAAAGAAGAATACTGCAGCTTCCTTACAACAGTGGAAAGTTGGGGACAAATGTTCTGCCATTTGGTCAGAAGACGGTTGCA
176360_8716489_SMN1_1_1_4	TGGTCAGAAGACGGTTGCATTTACCCAGCTACCATTGCTTCAATTGATTTTAAGAGAGAAACCTGTGTTGTGGTTTACACTGGATATGGAAATAGAGAGGAGCAAAATCTGTCCGATCTA
176360_8716489_SMN1_1_1_5	GCAAAATCTGTCCGATCTACTTTCCCCAATCTGTGAAGTAGCTAATAATATAGAACAAAATGCTCAAGAGAATGAAAATGAAAGCCAAGTTTCAACAGATGAAAGTGAGAACTCCAGGTC
176360_8716489_SMN1_1_1_6	AAAGTGAGAACTCCAGGTCTCCTGGAAATAAATCAGATAACATCAAGCCCAAATCTGCTCCATGGAACTCTTTTCTCCCTCCACCACCCCCCATGCCAGGGCCAAGACTGGGACCAGGAA
176360_8716490_NAIP_1_1_1	CCAAAGTAGCAATCAGTGGAGGTTTCCAGAAACTTGAGAACCTAAAGCTTTCAATCAATCACAAGATTACAGAGGAAGGATACAGAAATTTCTTTCAAGCACTGGACAACATGCCAAACT
176360_8716490_NAIP_1_1_2	CTTGCAGGAGTTGGACATCTCCAGGCATTTCACAGAGTGTATCAAAGCTCAGGCCACAACAGTCAAGTCTTTGAGTCAATGTGTGTTACGACTACCAAGGCTCATTAGACTGAACATGTT
176360_8716490_NAIP_1_1_3	TTAAGTTGGCTCTTGGATGCAGATGATATTGCATTGCTTAATGTCATGAAAGAAAGACATCCTCAATCTAAGTACTTAACTATTCTCCAGAAATGGATACTGCCGTTCTCTCCAATCATT
176360_8716490_NAIP_1_1_4	TTCAGAAATAAATGTGAATTTCTTCGGAGTAAGAAATCCTCAGAGGAAATTACCCAGTATATTCAAAGCTACAAGGGATTTGTTGACATAACGGGAGAACATTTTGTGAATTCCTGGGTC
176360_8716490_NAIP_1_1_5	TCCAGAGAGAATTACCTATGGCATCAGCTTATTGCAATGACAGCATCTTTGCTTACGAAGAACTACGGCTGGACTCTTTTAAGGACTGGCCCCGGGAATCAGCTGTGGGAGTTGCAGCAC
176360_8716490_NAIP_1_1_6	ACTGGCCAAAGCAGGTCTTTTCTACACAGGTATAAAGGACATCGTCCAGTGCTTTTCCTGTGGAGGGTGTTTAGAGAAATGGCAGGAAGGTGATGACCCATTAGACGATCACACCAGATG
176360_8716490_NAIP_1_1_7	TGTTTTCCCAATTGTCCATTTCTCCAAAATATGAAGTCCTCTGCGGAAGTGACTCCAGACCTTCAGAGCCGTGGTGAACTTTGTGAATTACTGGAAACCACAAGTGAAAGCAATCTTGAA
176360_8716490_NAIP_1_1_8	AAGATTCAATAGCAGTTGGTCCTATAGTGCCAGAAATGGCACAGGGTGAAGCCCAGTGGTTTCAAGAGGCAAAGAATCTGAATGAGCAGCTGAGAGCAGCTTATACCAGCGCCAGTTTCC
176360_8716490_NAIP_1_1_9	CCGCCACATGTCTTTGCTTGATATCTCTTCCGATCTGGCCACGGACCACTTGCTGGGCTGTGATCTGTCTATTGCTTCAAAACACATCAGCAAACCTGTGCAAGAACCTCTGGTGCTGCC
176360_8716490_NAIP_1_1_13	CGGACCTGCCTATTGATTGCTGTCCGTACAAACAGGGCCAGGGACATCCGCCGATACCTAGAGACCATTCTAGAGATCAAAGCATTTCCCTTTTATAATACTGTCTGTATATTACGGAAG
176360_8716490_NAIP_1_1_17	TTACAGCCCAGAGACTAAGACCATTCTACCGGTTTTTAAGTCCTGCCTTCCAAGAATTTCTTGCGGGGATGAGGCTGATTGAACTCCTGGATTCAGATAGGCAGGAACATCAAGATTTGG
176360_8716490_NAIP_1_1_21	TCAAGGGAGAACACTGACTTTGGGTGCGCTTAACTTACAGTACTTTTTCGACCACCCAGAAAGCTTGTCATTGTTGAGGAGCATCCACTTCCCAATACGAGGAAATAAGACATCACCCAG
176360_8716490_NAIP_1_1_25	CCAGCTCTTGAGCTGTCTAAGGCCTCTGTCACCAAGTGCTCCATAAGCAAGTTGGAACTCAGCGCAGCCGAACAGGAACTGCTTCTCACCCTGCCTTCCCTGGAATCTCTTGAAGTCTCA
176360_8716490_NAIP_1_1_26	CAGGGACAATCCAGTCACAAGACCAAATCTTTCCTAATCTGGATAAGTTCCTGTGCCTGAAAGAACTGTCTGTGGATCTGGAGGGCAATATAAATGTTTTTTCAGTCATTCCTGAAGAAT
176360_8716490_NAIP_1_1_27	ATTTCCAAACTTCCACCATATGGAGAAATTATTGATCCAAATTTCAGCTGAGTATGATCCTTCCAAACTAGTAAAATTAATTCAAAATTCTCCAAACCTTCATGTTTTCCATCTGAAGTG
176360_8716490_NAIP_1_1_28	TGTAACTTCTTTTCGGATTTTGGGTCTCTCATGACTATGCTTGTTTCCTGTAAGAAACTCACAGAAATTAAGTTTTCGGATTCATTTTTTCAAGCCGTCCCATTTGTTGCCAGTTTGCCA
176360_8716490_NAIP_1_1_29	CAAATTTTATTTCTCTGAAGATATTAAATCTTGAAGGCCAGCAATTTCCTGATGAGGAAACATCAGAAAAATTTGCCTACATTTTAGGTTCTCTTAGTAACCTGGAAGAATTGATCCTTC
176360_8716490_NAIP_1_1_30	TCCTACTGGGGATGGAATTTATCGAGTGGCCAAACTGATCATCCAGCAGTGTCAGCAGCTTCATTGTCTCCGAGTCCTCTCATTTTTCAAGACTTTGAATGATGACAGCGTGGTGGAAAT
176360_8716491_DUSP22_1_1_1	ATGGGGAATGGGATGAACAAGATCCTGCCCGGCCTGTACATCGGCAACTTCAAAGATGCCAGAGACGCGGAACAATTGAGCAAGAACAAGGTGACACATATTCTGTCTGTCCACGATAGT
176360_8716491_DUSP22_1_1_2	TTCTGTCTGTCCACGATAGTGCCAGGCCTATGTTGGAGGGAGTTAAATACCTGTGCATCCCAGCAGCGGATTCACCATCTCAAAACCTGACAAGACATTTCAAAGAAAGTATTAAATTCA
176360_8716491_DUSP22_1_1_3	CAAAGAAAGTATTAAATTCATTCACGAGTGCCGGCTCCGCGGTGAGAGCTGCCTTGTACACTGCCTGGCCGGGGTCTCCAGGAGCGTGACACTGGTGATCGCATACATCATGACCGTCAC
176360_8716491_DUSP22_1_1_4	GCATACATCATGACCGTCACTGACTTTGGCTGGGAGGATGCCCTGCACACCGTGCGTGCTGGGAGATCCTGTGCCAACCCCAACGTGGGCTTCCAGAGACAGCTCCAGGAGTTTGAGAAG
176360_8716491_DUSP22_1_1_5	AGCTCCAGGAGTTTGAGAAGCATGAGGTCCATCAGTATCGGCAGTGGCTGAAGGAAGAATATGGAGAGAGCCCTTTGCAGGATGCAGAAGAAGCCAAAAACATTCTGGGTAAATATAAGG
176360_8716491_DUSP22_1_1_6	CATTCTGGGTAAATATAAGGAGCAAGGGCGCACAGAGCCCCAGCCCGGCGCCAGGCGGTGGAGCAGTTTTCCGGCACTGGCTCCGCTGACCTACGATAATTATACGACGGAGACCTAA
176360_8716492_ZNF322_1_1_1	ATGTACACTTCAGAAGAGAAATGTAATCAGAGAACTCAAAAAAGGAAAATATATAATGTATGCCCTCGGAAGGGTAAAAAGATTTTTATTCATATGCATGAGATTATTCAGATAGATGGT
176360_8716492_ZNF322_1_1_3	TGATATGTGTGAGAAAACCTTTGTCCAAAGCTCAGATCTTACTTCACACCAGAGGATCCACAATTACGAGAAACCTTATAAATGTAGCAAATGTGAGAAGAGCTTTTGGCATCACTTAGC
176360_8716492_ZNF322_1_1_5	AGCGAAGCCATACTGGCGAGAAACCATATCTATGTAGTGAGTGTGACAAATGCTTCAGTAGAAGTACAAACCTCATAAGGCATCGAAGAACTCACACAGGTGAGAAACCATTTAAGTGTC
176360_8716492_ZNF322_1_1_7	AGTTACCGACACCGTTCAGCCTTCATTGTACATAAAAGAGTTCATACTGGGGAGAAGCCCTATAAGTGTGGTGCCTGTGAAAAATGCTTTGGCCAGAAATCAGACCTTATCGTGCACCAG
176360_8716492_ZNF322_1_1_9	CACTTTTAAATGCCTTGAATATGAAAAAAGCTTTAACTGTAGCTCAGATCTTATTGTACATCAGAGAATTCACATGGAAGAGAAACCACATCAGTGGTCTGCGTGTGAGAGTGGCTTCCT
176360_8716492_ZNF322_1_1_11	CAGCCCTTCTTCAACATCAGACAGTACACATTGGTGAAAAACCGTTTGTCTGTAATGTGAGTGAAAAAGGTCTTGAGCTTAGCCCTCCCCATGCGTCAGAAGCCTCACAGATGTCTTGA
176360_8716493_TCAF2_1_1_1	ATGGCGACCATTGCTGCTGCTGCGTTTGAGGCCCTCATGGATGGAGTGACATGCTGGGATGTCCCCAGAGGCCCCATCCCCAGTGAACTCCTTCTTATTGGAGAAGCCGCCTTCCCCGTG
176360_8716493_TCAF2_1_1_2	AGAAGCCGCCTTCCCCGTGATGGTGAATGACAAGGGCCAGGTGCTCATTGCTGCCTCCTCCTACGGCCGAGGCCGCCTCGTGGTTGTGTCCCATGAGGGCTACCTGTCGCATACTGGCTT
176360_8716493_TCAF2_1_1_3	ACCTGTCGCATACTGGCTTGGCTCCATTTCTCCTCAATGCAGTGAGCTGGCTCTGTCCCTGTCCTGGGGCTCCCGTGGGAGTGCATCCATCCCTGGCACCTCTAGTAAACATCCTACAGG
176360_8716493_TCAF2_1_1_4	CTAGTAAACATCCTACAGGATGCTGGGCTTGAGGCACAGGTCAAGCCAGAACCAGGAGAGCCCCTAGGGGTTTACTGTATCAATGCCTACAATGACACCTTGACTGCAACGCTGATCCAG
176360_8716493_TCAF2_1_1_5	GACTGCAACGCTGATCCAGTTTGTGAAACATGGAGGGGGCTTGTTAATCGGGGGCCAGGCCTGGTACTGGGCCAGCCAGCACGGCCCTGACAAGGTGCTCTCCAGGTTCCCTGGGAACAA
176360_8716493_TCAF2_1_1_6	CCAGGTTCCCTGGGAACAAGGTGACAAGTGTAGCTGGAGTGTACTTCACTGACACCTATGGGGACAGAGACCGGTTCAAGGTCTCTAAGAAGGTGCCCAAGATCCCACTCCATGTCAG
176360_8716494_TCAF2_2_1_1	GTATGGGGAGGATGTCAGGCAGGACCAGCAGCAGCTCCTGGAGGGGATCTCAGAGCTGGACATCAGGACAGGGGGAGTCCCCTCACAGCTGCTTGTACATGGAGCCCTGGCCTTCCCTCT
176360_8716494_TCAF2_2_1_2	GCCTTCCCTCTGGGGCTGGATGCCTCACTCAACTGCTTCCTGGCGGCTGCTCACTATGGCCGGGGCCGGGTGGTCCTGGCTGCCCACGAGTGCCTGCTCTGTGCTCCCAAGATGGGGCCC
176360_8716494_TCAF2_2_1_3	AGATGGGGCCCTTCTTGCTCAATGCGGTGCGCTGGCTGGCCAGAGGCCAGACAGGCAAAGTTGGGGTGAACACAAATCTAAAAGATCTGTGTCCTCTCCTATCGGAGCATGGCCTGCAAT
176360_8716494_TCAF2_2_1_4	TGGCCTGCAATGCAGCCTGGAGCCCCATCTGAACAGCGACTTGTGTGTCTACTGCTGCAAGGCGTACAGTGACAAGGAGGCTAAGCAGCTGCAGGAGTTTGTGGCTGAGGGTGGGGGGCT
176360_8716494_TCAF2_2_1_5	GGTGGGGGGCTGCTGATTGGGGGCCAGGCCTGGTGGTGGGCCTCCCAGAACCCTGGCCACTGCCCCTTGGCTGGCTTCCCTGGTAACATCATCCTCAACTGCTTTGGCCTCAGCATCCTG
176360_8716494_TCAF2_2_1_6	TCAGCATCCTGCCTCAGACTCTCAAAGCAGGCTGCTTCCCCGTTCCCACCCCTGAGATGAGAAGCTACCACTTCCGCAAGGCGCTCTCTCAATTCCAGGCTATACTGAACCACGAGAATG
176360_8716494_TCAF2_2_1_7	CCACGAGAATGGGAACTTGGAAAAGAGCTGTCTGGCAAAGTTGAGAGTTGATGGTGCAGCCTTCCTACAGATTCCTGCGGAGGGGGTCCCTGCTTACATATCCCTGCACAGGCTCCTGAG
176360_8716494_TCAF2_2_1_8	AGGCTCCTGAGGAAGATGCTACGAGGGTCTGGCCTCCCAGCTGTGAGCCGGGAAAATCCAGTTGCCAGTGACTCCTATGAGGCTGCGGTGCTCTCCCTGGCCACTGGGCTGGCTCACTCT
176360_8716494_TCAF2_2_1_9	TGGCTCACTCTGGAACTGACTGCTCCCAGCTGGCCCAGGGGCTTGGCACCTGGACCTGCTCCTCCAGTTTGTACCCCTCAAAACACCCCATCACCGTGGAGATCAATGGAATCAACCCAG
176360_8716495_TCAF2_3_1_1	GCAACAATGATTGCTGGGTGAGTACCGGGCTCTACCTCCTGGAAGGACAAAATGCAGAAGTCTCACTGTCTGAAGCTGCTGCCTCTGCTGGCCTGAGGGTACAGATAGGCTGCCACACCG
176360_8716495_TCAF2_3_1_2	GGGTACAGATAGGCTGCCACACCGATGACCTTACCAAGGCCAGGAAGCTATCTCGAGCCCCCGTGGTGACTCACCAATGCTGGATGGACAGGACTGAGCGGTCAGTCTCCTGCCTCTGGG
176360_8716495_TCAF2_3_1_3	AGCGGTCAGTCTCCTGCCTCTGGGGCGGCCTCCTCTACGTCATCGTGCCCAAGGGCAGCCAACTAGGCCCTGTGCCTGTCACTATCAGGGGAGCTGTGCCTGCCCCATACTACAAGCTGG
176360_8716496_TCAF2_5_1_1	TAAGACATCGCTGGAGGAGTGGAAGAGGCAGATGCAGGAGAACCTGGCTCCCTGGGGAGAGCTGGCCACGGACAACATCATCCTGACAGTGCCAACCACAAACCTTCAGGCCCTGAAGGA
176360_8716496_TCAF2_5_1_2	CCCCGAGCCTGTGCTCCGCCTCTGGGATGAGATGATGCAGGCTGTGGCCAGGCTGGCGGCTGAGCCCTTCCCTTTCCGCCGTCCTGAGAGGATTGTGGCTGATGTGCAGATCTCAGCTG
176360_8716497_TCAF2_6_1_1	GCTGGATGCATTCAGGATACCCCATCATGTGCCACCTGGAGTCTGTGAAGGAGATCATCAATGAGATGGACATGAGGAGCAGGGGTGTGTGGGGCCCCATCCATGAGCTGGGCCACAACC
176360_8716497_TCAF2_6_1_2	GGGCCACAACCAACAGCGGCATGGATGGGAGTTCCCCCCACACACTACTGAGGCCACCTGTAACCTTTGGTCAGTCTACGTGCATGAAACAGTCCTGGGGATCCCCAGGGCTCAGGCCCA
176360_8716497_TCAF2_6_1_3	GCTCAGGCCCACGAGGCTCTGAGCCCTCCAGAGCGAGAGAGGAGAATCAAGGCCCACCTGGGAAAGGGAGCCCCCCTGTGTGACTGGAATGTATGGACAGCCCTGGAAACATATCTACAG
176360_8716498_OR2A1_1_1_1	TGCAGGAGGTTCACCAGCATCTGGGGCACTGTGTTGCAGGCATAGGCGATGTTGACGACGGCCAGGTGTGAGAGGAAGAAGTACATGGGGGTGTGGAGTCTGGAGTCCAGTGAGATGAGC
176360_8716498_OR2A1_1_1_2	CAGGTGTGAGAGGAAGAAGTACATGGGGGTGTGGAGTCTGGAGTCCAGTGAGATGAGCCCCAGGATGGTCCCATTCCCCAGCAGGGTGAAGACATAGAACAGGGAGAAGAGCCCAAAGAG
176360_8716498_OR2A1_1_1_3	GGATGGTCCCATTCCCCAGCAGGGTGAAGACATAGAACAGGGAGAAGAGCCCAAAGAGGAGCATCTGAATCCTTGGGCCCAGGAGAAATCCCAGTAGGAGGAACTCTGTGACCATTGTCT
176360_8716499_OR2A1_2_1_1	TGGGGGAAAATCAGACAATGGTCACAGAGTTCCTCCTACTGGGATTTCTCCTGGGCCCAAGGATTCAGATGCTCCTCTTTGGGCTCTTCTCCCTGTTCTATATCTTCACCCTGCTGGGGA
176360_8716499_OR2A1_2_1_2	GGGAACGGGGCCATCCTGGGGCTCATCTCACTGGACTCCAGACTCCACACCCCCATGTACTTCTTCCTCTCACACCTGGCTGTCGTCGACATCGCCTACACCCGCAACACGGTGCCCCAG
176360_8716499_OR2A1_2_1_3	CCAGATGCTGGCGAACCTCCTGCATCCAGCCAAGCCCATCTCCTTTGCTGGCTGCATGACGCAGACCTTTCTCTGTTTGAGTTTTGGACACAGCGAATGTCTCCTGCTGGTGCTGATGTC
176360_8716499_OR2A1_2_1_4	TGTCCTACGATCGTTACGTGGCCATCTGCCACCCTCTCCGATACTCCGTCATCATGACCTGGAGAGTCTGCATCACCCTGGCCGTCACTTCCTGGACGTGTGGCTCCCTCCTGGCTCTGG
176360_8716499_OR2A1_2_1_5	CTGGCCCATGTGGTTCTCATCCTAAGACTGCCCTTCTCTGGGCCTCATGAAATCAACCACTTCTTCTGTGAAATCCTGTCTGTCCTCAGGCTGGCCTGTGCTGACACCTGGCTCAACCAG
176360_8716499_OR2A1_2_1_6	CCAGGTGGTCATCTTTGCAGCCTGCGTGTTCTTCCTGGTGGGGCCACCCAGCCTGGTGCTTGTCTCCTACTCGCACATCCTGGCGGCCATCCTGAGGATCCAGTCTGGGGAGGGCCGCAG
176360_8716499_OR2A1_2_1_7	GCAGAAAGGCCTTCTCCACCTGCTCCTCCCACCTCTGCGTGGTGGGACTCTTCTTTGGCAGTGCCATCATCATGTACATGGCCCCCAAGTCCCGCCATCCTGAGGAGCAGCAAAAGGTCT
176360_8716499_OR2A1_2_1_8	GTCTTTTTTCTATTTTACAGTTTTTTCAACCCAACACTTAACCCCCTGATTTACAGCCTGAGGAACGGAGAGGTCAAGGGTGCCCTGAGGAGAGCACTGGGCAAGGAAAGTCATTCCTAA
176360_8716500_ARHGEF5_1_1_1	ATGGAGGCTGAGGAGGCCCAGCGTGGAGCCTCTCCTCCCATCTCTGCCATAGAGGAATTCAGCATTATCCCTGAGGCTCCCATGAGGAGCAGCCAGGTCTCTGCCTTGGGGCTTGAAGCT
176360_8716500_ARHGEF5_1_1_5	TTGGGATCTGGACAGGCAGAAGAAGAAGAGGAAACCTCTTCAGATAACTCTGGTCAGACCAGATATTATTCTCCCTGCGAAGAGCATCCTGCAGAGACCAACCAGAATGAAGGCTCTGAA
176360_8716501_ARHGEF5_1_2_2	GTCCAGAACAGGGAGAAGAGAGGAAGAGGGAGCTGCAGGTGCCAGAAGAGAATAGGGCGGACTCTCAGGACGAAAAGAGTCAAACCTTTTTGGGAAAATCAGAGGAAGTAACTGGAAAGC
176360_8716501_ARHGEF5_1_2_6	TAGATCAAAACAGCCAGCAAGAGGAATCCAGGCTGAGGAAGGGAACAGTGTCCAGCCAAGGGACTGAGGTGGTCTTTGCCAGTGCATCTGTGACTCCTCCAAGGACACCAGATTCAGCTC
176360_8716501_ARHGEF5_1_2_10	CCATCTACAGCTCTGTGACCCCAAGAAGGGACAGAAGGAGTGGTAGGGACTACAGCACCGTTTCAGCATCCCCTACTGCCTTATCCACGCTGAAGCAGGACTCTCAAGAATCCATCTCAA
176360_8716501_ARHGEF5_1_2_14	ACCATGCTCAGGCCACCCCCAGGTGGAGATACAACAAGCCGCTACCCCCTACCCCTGATTTGCCGCAGCCCCACCTTCCTCCCATTTCTGCTCCTGGTAGCTCAAGGATCTACAGGCCTC
176360_8716501_ARHGEF5_1_2_19	TGGAGAAGGCGTCCAGCTGGCCCCACAGGCGGGACTCAGGGAGGCCACCAGGGGACAGCAGTGGACAGGCTGTGGCTCCTAGTGAGGGGGCCAACAAGCACAAGGGCTGGAGCCGGCAGG
176360_8716501_ARHGEF5_1_2_20	GCCTGCGCAGACCTTCCATCTTGCCTGAGGGCTCTTCAGATTCAAGAGGTCCAGCCGTGGAGAAACATCCGGGACCCTCAGACACTGTTGTTTTTCGGGAGAAAAAACCAAAGGAGGTGA
176360_8716501_ARHGEF5_1_2_21	TGGGAGGCTTTTCAAGACGCTGCTCCAAACTCATCAACTCCTCCCAGCTGCTTTACCAGGAGTATAGTGATGTTGTCCTGAATAAGGAGATCCAGAGCCAGCAGCGGCTGGAGAGCCTGT
176360_8716501_ARHGEF5_1_2_22	CCGAGACACCCGGGCCTAGCTCTCCGCGGCAGCCTCGGAAGGCCCTGGTCTCCTCCGAGTCGTACCTGCAGCGGCTCTCCATGGCCTCCAGCGGCTCCCTCTGGCAGGAAATCCCCGTGG
176360_8716501_ARHGEF5_1_2_23	TGCGCAACAGCACCGTGCTGCTCTCCATGACCCATGAAGACCAAAAGCTGCAAGAGGTCAAATTTGAGCTGATTGTGTCAGAGGCCTCCTACCTGCGCAGTCTAAACATAGCTGTGGATC
176360_8716501_ARHGEF5_1_2_24	ATTTCCAACTTTCAACTTCACTCCGGGCCACACTTTCCAACCAGGAGCACCAATGGCTCTTCTCTCGTTTACAGGATGTGCGAGACGTCAGCGCCACGTTCCTTTCAGACCTGGAAGAGA
176360_8716501_ARHGEF5_1_2_25	ACTTTGAGAACAATATCTTCTCCTTCCAAGTATGTGACGTAGTCCTGAACCACGCCCCAGACTTCCGCCGGGTCTACCTGCCTTATGTCACCAACCAGACCTATCAGGAACGCACCTTCC
176360_8716501_ARHGEF5_1_2_26	AGAGCCTGATGAATAGCAACAGCAATTTCCGGGAGGTCTTGGAGAAGCTGGAGAGCGACCCCGTCTGCCAGCGCCTTTCCCTCAAGTCCTTTCTGATTCTGCCCTTCCAACGCATCACCC
176360_8716501_ARHGEF5_1_2_27	GCCTCAAACTGCTGCTCCAGAACATTCTGAAGAGAACACAGCCTGGCTCCTCGGAGGAGGCAGAGGCCACGAAGGCACACCACGCCCTGGAGCAGCTGATCCGGGACTGCAATAACAATG
176360_8716501_ARHGEF5_1_2_28	TCCAGAGTATGCGACGGACAGAGGAACTAATCTACCTGAGCCAGAAGATTGAGTTTGAGTGCAAAATATTCCCGCTCATTTCTCAGTCACGCTGGCTGGTGAAAAGTGGGGAGCTGACAG
176360_8716501_ARHGEF5_1_2_29	CCTTGGAGTTCAGTGCTTCCCCAGGGCTACGAAGGAAGCTGAACACGCGTCCAGTCCACCTGCACCTCTTCAATGACTGTCTGCTGCTGTCTCGGCCCCGAGAGGGTAGCCGATTCCTGG
176360_8716501_ARHGEF5_1_2_30	TATTTGACCATGCTCCCTTCTCCTCCATTCGGGGGGAAAAGTGTGAAATGAAGCTACATGGACCTCACAAAAACCTGTTCCGACTCTTTCTGCGGCAGAACACTCAGGGCGCCCAGGCCG
176360_8716501_ARHGEF5_1_2_31	AGTTCCTCTTCCGCACGGAGACTCAAAGTGAAAAGCTTCGGTGGATCTCAGCCTTGGCCATGCCAAGAGAGGAGTTGGACCTTCTGGAGTGTTACAACTCCCCCCAGGTACAGTGCCTTC
176360_8716501_ARHGEF5_1_2_32	GAGCCTACAAGCCCCGAGAGAATGATGAATTGGCACTGGAGAAAGCCGACGTGGTGATGGTGACTCAGCAGAGCAGTGACGGCTGGCTGGAGGGCGTGAGGCTCTCAGACGGGGAGCGAG
176360_8716501_ARHGEF5_1_2_33	GCTGGTTTCCTGTGCAGCAGGTGGAGTTCATTTCCAACCCAGAGGTCCGTGCACAGAACCTGAAGGAAGCTCATCGAGTCAAGACTGCCAAACTACAGCTGGTGGAACAGCAAGCCTAA
176360_8716502_LOC643650_1_1_1	AATCAGGTTTCAAAGCCACTTCAACTGCACTGGCCCCTGTGGGTCACTGCTGCACCGCCCTGACCCATGTGGGTCCCTGAGGAGCGACCTGCCGGGGCCACCTGGCTGGACGAAAAAGAC
176360_8716502_LOC643650_1_1_2	TGGCCCCTGTGGGTCACTGCTGCACCGCCCTGACCCATGTGGGTCCCTGAGGAGCGACCTGCCGGGGCCACCTGGCTGGACGAAAAAGACACACCTTGGACTTAAGCCGTGAGAAAAAAA
176360_8716503_LOC643650_2_1_1	AGATGAAAAGATGGGCCAGGAGTCCAGTTTCTGGAAGGCCAAGAATCGAAGTAGCAAGCTGCAGCCGTTTTCCAGACAAGCAGGATGTGGGGATGCAGAAGAATTCAGGACTGGAGGGGC
176360_8716503_LOC643650_2_1_2	CAGGACTGGAGGGGCAAACTCCGATGTGACTGAGGCCCCACTGCCAAATGGCAGCATGCTCAGATAGCACCCAGGAATTTGGGGAAAAAAACTGGTGCTCACAGCTGCCCAGTTAAGGCA
176360_8716503_LOC643650_2_1_3	TGCCCAGTTAAGGCACAAGTCTCCCGCCTGCTGCAGGGGTTGTGAGGTGTATCAGAACCTTGAAGAGATACTCTGGGAAGAAAGGCCTTCCCAGACTGCCTCTCCGCAGCGCTGTAAGAA
176360_8716503_LOC643650_2_1_4	GCAGCGCTGTAAGAATCAGATTTCTTCTATGGGGGACTTCCAGGTCTCTTCAGCATTTTCTCAGTCATCACTGTATCCCTGCCACTCAGTGAACCACAGCAACAACTCCCAGCTTCCAGC
176360_8716503_LOC643650_2_1_5	CTCCCAGCTTCCAGCCGAGAAGCTTGACCCTGAAGCTGGCCTCGATTCTCTACAGAAGTGAGGCCACAGAGCACAGGTGAAGGGCCACTTACCTGGTATCATCTCTGGTCTCAGCTCTGG
176360_8716503_LOC643650_2_1_6	TGGTCTCAGCTCTGGAGAACTAGCTCCTCTGCCACTGCCACATCCTGTCCACCAAGACCTCCTTGCTGAACCCCACCCCCACCCGGTGCCTCAGGACCCTAACTTGTTTGCTGACCTCCA
176360_8716504_CHRNA7_1_1_1	TGCTGATGAGCGCTTTGACGCCACATTCCACACTAACGTGTTGGTGAATTCTTCTGGGCATTGCCAGTACCTGCCTCCAGGCATATTCAAGAGTTCCTGCTACATCGATGTACGCTGGTT
176360_8716504_CHRNA7_1_1_2	TGGTTTCCCTTTGATGTGCAGCACTGCAAACTGAAGTTTGGGTCCTGGTCTTACGGAGGCTGGTCCTTGGATCTGCAGATGCAGGAGGCAGATATCAGTGGCTATATCCCCAATGGAGAA
176360_8716504_CHRNA7_1_1_3	GAGAATGGGACCTAGTGGGAATCCCCGGCAAGAGGAGTGAAAGGTTCTATGAGTGCTGCAAAGAGCCCTACCCCGATGTCACCTTCACAGTGACCATGCGCCGCAGGACGCTCTACTATG
176360_8716504_CHRNA7_1_1_4	CTATGGCCTCAACCTGCTGATCCCCTGTGTGCTCATCTCCGCCCTCGCCCTGCTGGTGTTCCTGCTTCCTGCAGATTCCGGGGAGAAGATTTCCCTGGGGATAACAGTCTTACTCTCTCT
176360_8716504_CHRNA7_1_1_5	TCTCTTACCGTCTTCATGCTGCTCGTGGCTGAGATCATGCCCGCAACATCCGATTCGGTACCATTGATAGCCCAGTACTTCGCCAGCACCATGATCATCGTGGGCCTCTCGGTGGTGGTG
176360_8716504_CHRNA7_1_1_6	TGGTGACAGTGATCGTGCTGCAGTACCACCACCACGACCCCGACGGGGGCAAGATGCCCAAGTGGACCAGAGTCATCCTTCTGAACTGGTGCGCGTGGTTCCTGCGAATGAAGAGGCCCG
176360_8716504_CHRNA7_1_1_7	GCCCGGGGAGGACAAGGTGCGCCCGGCCTGCCAGCACAAGCAGCGGCGCTGCAGCCTGGCCAGTGTGGAGATGAGCGCCGTGGCGCCGCCGCCCGCCAGCAACGGGAACCTGCTGTACAT
176360_8716504_CHRNA7_1_1_8	TACATCGGCTTCCGCGGCCTGGACGGCGTGCACTGTGTCCCGACCCCCGACTCTGGGGTAGTGTGTGGCCGCATGGCCTGCTCCCCCACGCACGATGAGCACCTCCTGCACGGCGGGCAA
176360_8716504_CHRNA7_1_1_9	GGCAACCCCCCGAGGGGGACCCGGACTTGGCCAAGATCCTGGAGGAGGTCCGCTACATTGCCAACCGCTTCCGCTGCCAGGACGAAAGCGAGGCGGTCTGCAGCGAGTGGAAGTTCGCCG
176360_8716504_CHRNA7_1_1_10	CGCCGCCTGTGTGGTGGACCGCCTGTGCCTCATGGCCTTCTCGGTCTTCACCATCATCTGCACCATCGGCATCCTGATGTCGGCTCCCAACTTCGTGGAGGCCGTGTCCAAAGACTTTGC
176360_8716505_TCAF1_2_1_1	TTGTGAAGATGACCTCTCCGACGACAGAGAAGAGCTTCTGCATGGGATTTCAGAGCTGGACATCAGCAACTCGGATTGTTTCCCATCCCAGCTGCTAGTGCATGGGGCTTTAGCCTTTCC
176360_8716505_TCAF1_2_1_2	CTCTAGGGTTAGATTCCTACCATGGCTGTGTTATAGCGGCTGCCCGCTATGGCCGGGGCCGGGTGGTTGTGACTGGCCATAAGGTATTATTCACTGTTGGTAAACTGGGCCCCTTTCTGC
176360_8716505_TCAF1_2_1_3	CTCAATGCTGTCCGCTGGCTGGATGGGGGCCGCAGAGGCAAGGTTGTGGTGCAGACAGAGCTGAGAACCCTGAGTGGCCTCCTCGCAGTGGGGGGCATAGACACCAGCATCGAGCCCAAT
176360_8716505_TCAF1_2_1_4	TCTGACCAGTGATGCAAGTGTCTACTGCTTTGAACCCGTGAGTGAAGTGGGGGTCAAGGAACTGCAGGAGTTTGTAGCAGAGGGTGGCGGGCTATTTGTTGGAGCCCAAGCCTGGTGGTG
176360_8716505_TCAF1_2_1_5	GGGCCTTCAAGAACCCCGGAGTGTCCCCTTTGGCTCGATTCCCAGGAAACCTCCTCCTCAACCCCTTTGGCATCAGCATTACAAGCCAAAGCCTCAATCCAGGGCCCTTTCGTACTCCTA
176360_8716505_TCAF1_2_1_6	AAAGCAGGGATAAGGACCTATCACTTCCGCTCCACCTTGGCCGAGTTCCAGGTTATAATGGGCAGGAAGAGAGGAAATGTGGAAAAGGGCTGGTTGGCAAAGCTGGGACCAGATGGTGCA
176360_8716505_TCAF1_2_1_7	AGCTTTCCTGCAGATTCCCGCAGAAGAGATCCCTGCCTACATGTCTGTGCATCGACTCCTGAGGAAGCTGCTAAGTCGATATCGGCTTCCAGTAGCAACCCGAGAGAACCCTGTTATCAA
176360_8716505_TCAF1_2_1_8	ATGACTGCTGCAGAGGTGCTATGCTTTCCCTGGCCACAGGGCTGGCCCACTCTGGAAGCGACCTCTCTCTGTTAGTCCCAGAAATTGAAGATATGTACAGCAGCCCCTATCTGCGCCCCT
176360_8716505_TCAF1_2_1_9	TCAGAATCTCCTATCACCGTCGAGGTCAACTGCACCAATCCAGGCACCAGATATTGCTGGATGAGTACTGGGCTCTACATACCTGGAAGGCAAATTATAGAAGTCTCACTGCCTGAAGCT
176360_8716505_TCAF1_2_1_10	TGCTGCCTCTGCCGACCTGAAGATACAGATTGGCTGCCACACAGATGACCTGACCAGGGCCAGCAAGCTTTTCCGAGGCCCACTCGTAATTAACCGGTGCTGCTTGGACAAACCCACAAA
176360_8716505_TCAF1_2_1_11	AATCGATCACGTGCCTCTGGGGTGGACTCCTCTATATAATTGTGCCTCAGAACAGCAAACTGGGTTCTGTGCCTGTCACCGTGAAGGGGGCTGTGCATGCTCCATACTACAAGCTGGGGG
176360_8716505_TCAF1_2_1_12	GAGACCACCCTGGAGGAGTGGAAGAGGCGTATCCAGGAGAATCCAGGGCCCTGGGGAGAGCTGGCCACGGACAACATCATTCTGACCGTGCCGACCGCAAATCTTCGTACTCTGGAGAAC
176360_8716505_TCAF1_2_1_13	CCCTGAGCCGCTGCTCCGCCTCTGGGATGAGGTGATGCAGGCTGTGGCGCGACTGGGAGCTGAGCCCTTCCCTTTGCGCCTGCCTCAGAGGATTGTTGCCGACGTGCAGATCTCAGTGGG
176360_8716505_TCAF1_2_1_14	GCTGGATGCATGCAGGGTACCCCATCATGTGCCATCTGGAGTCAGTGCAGGAGCTCATCAACGAGAAGCTCATCAGAACCAAGGGGCTGTGGGGCCCCGTCCATGAGCTGGGCCGCAACC
176360_8716505_TCAF1_2_1_15	CAGCAGCGGCAGGAGTGGGAGTTCCCACCACACACCACCGAGGCCACCTGCAACCTGTGGTGTGTGTATGTGCATGAGACGGTCTTGGGCATTCCTCGAAGCCGTGCCAATATTGCTCTG
176360_8716505_TCAF1_2_1_16	GTGGCCCCCAGTTCGGGAGAAGAGAGTCAGAATCTACCTGAGCAAGGGTCCCAATGTGAAAAACTGGAATGCATGGACCGCACTGGAAACGTATTTACAGCTCCAGGAAGCCTTTGGTTG
176360_8716505_TCAF1_2_1_17	GGGAGCCATTCATCCGTCTCTTCACCGAGTACAGGAACCAGACCAACTTGCCCACAGAAAATGTTGACAAAATGAATCTGTGGGTCAAGATGTTCTCCCACCAAGTGCAGAAGAACCTGG
176360_8716505_TCAF1_2_1_18	GCTCCGTTCTTTGAGGCCTGGGCCTGGCCCATCCAGAAGGAAGTGGCTACCAGCCTGGCCTATCTGCCTGAATGGAAGGAAAATATTATGAAATTGTACCTCCTCACACAGAT
176360_8716507_AMY1A_1_1_1	ATGAAGTTCTTTCTGTTGCTTTTCACCATTGGGTTCTGCTGGGCTCAGTATTCCCCAAATACACAACAAGGACGGACATCTATTGTTCATCTGTTTGAATGGCGATGGGTTGATATTGCT
176360_8716507_AMY1A_1_1_3	AGTTAGCTATAAATTATGCACAAGATCTGGAAATGAAGATGAATTTAGAAACATGGTGACTAGATGTAACAATGTTGGGGTTCGTATTTATGTGGATGCTGTAATTAATCATATGTGTGG
176360_8716507_AMY1A_1_1_5	CTGGAAGTGGAGATATCGAGAACTACAATGATGCTACTCAGGTCAGAGATTGTCGTCTGACTGGTCTTCTTGATCTTGCACTGGAGAAGGATTACGTGCGTTCTAAGATTGCCGAATATA
176360_8716507_AMY1A_1_1_7	TTCCCTGCAGGAAGTAAACCTTTCATTTACCAGGAGGTAATTGATCTGGGTGGTGAGCCAATTAAAAGCAGTGACTACTTTGGTAATGGCCGGGTGACAGAATTCAAGTATGGTGCAAAA
176360_8716507_AMY1A_1_1_9	CAATCAACGAGGACATGGGGCTGGAGGAGCCTCTATTCTTACCTTCTGGGATGCTAGGCTGTACAAAATGGCAGTTGGATTTATGCTTGCTCATCCTTACGGATTTACACGAGTAATGTC
176360_8716507_AMY1A_1_1_11	GCAATGACTGGGTCTGTGAACATCGATGGCGCCAAATAAGGAACATGGTTATTTTCCGCAATGTAGTGGATGGCCAGCCTTTTACAAATTGGTATGATAATGGGAGCAACCAAGTGGCTT
176360_8716507_AMY1A_1_1_13	ATTAATGGCAATTGCACAGGCATTAAAATTTACGTTTCTGATGATGGCAAAGCTCATTTTTCTATTAGTAACTCTGCTGAAGATCCATTTATTGCAATTCATGCTGAATCTAAATTGTAA
176360_8716508_AMY1B_1_1_1	ATGAAGCTCTTTTGGTTGCTTTTCACCATTGGGTTCTGCTGGGCTCAGTATTCCTCAAATACACAACAAGGACGAACATCTATTGTTCATCTGTTTGAATGGCGATGGGTTGATATTGCT
176360_8716508_AMY1B_1_1_2	CTCTTGAATGTGAGCGATATTTAGCTCCCAAGGGATTTGGAGGGGTTCAGGTCTCTCCACCAAATGAAAATGTTGCCATTCACAACCCTTTCAGACCTTGGTGGGAAAGATACCAACCAG
176360_8716508_AMY1B_1_1_4	GGTAATGCTGTGAGTGCAGGAACAAGCAGTACCTGTGGAAGTTACTTCAACCCTGGAAGTAGGGACTTTCCAGCAGTCCCATATTCTGGATGGGATTTTAATGATGGTAAATGTAAAACT
176360_8716508_AMY1B_1_1_6	TATGAACCATCTCATTGACATTGGTGTTGCAGGGTTCAGAATTGATGCTTCCAAGCACATGTGGCCTGGAGACATAAAGGCAATTTTGGACAAACTGCATAATCTAAACAGTAACTGGTT
176360_8716508_AMY1B_1_1_8	AACTCGGCACAGTTATTCGCAAGTGGAATGGAGAGAAGATGTCTTACTTAAAGAACTGGGGAGAAGGTTGGGGTTTCATGCCTTCTGACAGAGCGCTTGTCTTTGTGGATAACCATGACA
176360_8716508_AMY1B_1_1_10	TCAAGCTACCGTTGGCCAAGATATTTTGAAAATGGAAAAGATGTTAATGATTGGGTTGGGCCACCAAATGATAATGGAGTAACTAAAGAAGTTACTATTAATCCAGACACTACTTGTGGC
176360_8716508_AMY1B_1_1_12	TTTTGGGAGAGGAAACAGAGGATTCATTGTTTTCAACAATGATGACTGGACATTTTCTTTAACTTTGCAAACTGGTCTTCCTGCTGGCACATACTGTGATGTCATTTCTGGAGATAAAAT
176360_8716511_KANSL1_1_1_1	GAGACGCAGGTCAGAATGGAAATGGGCTGCAGACCGGGCAGCTATTGTCAGCCGCTGGAACTGGCTTCAGGCTCATGTTTCTGACTTGGAATATCGAATTCGTCAGCAAACAGACATTTA
176360_8716511_KANSL1_1_1_2	ACAAACAGATACGTGCTAATAAGGGGTTGATAGTTCTTGGGGAGGTACCTCCCCCAGAGCATACAACAGACTTATTTCTTCCACTTAGTTCTGAGGTGAAGACAGATCATGGGACTGATA
176360_8716511_KANSL1_1_1_4	TAACACTCTTCAGCCTGTCTTGGCAGACCACATTCCAGGTGACAGCTCTGATGCTGAGGAACAATTACATAAGAAGCAACGACTGAATCTCGTCTCTTCATCATCTGATGGCACCTGTGT
176360_8716511_KANSL1_1_1_5	TGGCAGCCCGGACACGTCCTGTACTGAGCTGTAAGAAGCGGAGGCTTGTTCGACCCAACAGCATCGTTCCTCTTTCCAAGAAGGTTCACCGGAACAGCACAATCCGCCCTGGCTGTGATG
176360_8716511_KANSL1_1_1_7	TCTAGCATTTCCAGATGATGTTCCCACAAGCCTGCATTTCCAGAGCATGCTGAAATCTCAGTGGCAGAACAAGCCTTTTGACAAAATCAAACCTCCCAAAAAGTTATCGCTTAAGCACAG
176360_8716511_KANSL1_1_1_8	GAGCACCCATGCCGGGCAGTCTGCCAGATTCAGCTCGTAAGGACAGGCACAAATTGGTCAGCTCCTTCCTAACAACAGCCAAGCTGTCCCATCACCAAACCCGGCCTGACAGGACCCACA
176360_8716511_KANSL1_1_1_10	ATTGCGAGACCATTCATCTGAGAGAAGTGAAGTGTTGAAGCATCACACAGACATGAGCAGTTCGAGCTACTTGGCAGCCACCCACCATCCTCCACACAGTCCCTTGGTGCGACAGCTCTC
176360_8716511_KANSL1_1_1_11	CCACCTCCTCAGATTCCCCTGCACCCGCCAGCTCTAGCTCACAGGTTACAGCCAGCACATCGCAGCAGCCAGTAAGGAGGAGAAGGGGAGAGAGCTCATTTGATATTAACAACATTGTCA
176360_8716511_KANSL1_1_1_13	TGAAGAGATTGAGGACCTATCCGACGCAGCCTTCGCCGCCCTGCATGCCAAATGTGAGGAGATGGAGAGGGCACGGTGGCTGTGGACCACGAGTGTGCCACCCCAGCGGCGGGGCAGCAG
176360_8716511_KANSL1_1_1_14	GGTCCTACAGGTCATCAGACGGCCGGACAACCCCCCAGCTGGGCAGTGCCAACCCCTCCACCCCCCAGCCTGCCTCCCCTGATGTCAGCAGTAGCCACTCTTTGTCAGAATACTCCCATG
176360_8716511_KANSL1_1_1_16	GGGGCTGGATGAACAGTCTGTCCAGCCCTGGGAGCGGCGGACCTTCCCCCTGGCGCACAGTCCCCAGGCGGAGTGTGAGGACCAGCTGGATGCACAGGAGCGAGCAGCCCGCTGCACTCG
176360_8716511_KANSL1_1_1_17	GACGCACCTCAGGCAGCAAGACTGGCCGGGAGACAGAGGCAGCGCCCACCTCGCCTCCCATTGTCCCCCTCAAGAGTCGGCATCTGGTGGCAGCAGCCACAGCTCAGCGCCCGACTCACA
176360_8716512_ANK2_1_1_1	TCTGACAGCAATGCAAGCTTCCTCCGTGCTGCCAGAGCAGGCAACCTGGACAAAGTTGTGGAATATCTGAAGGGGGGCATAGACATCAATACCTGCAATCAGAATGGACTCAACGCTCTC
176360_8716512_ANK2_1_1_5	AATGACACCAAAGGGAAAGTGAGGCTGCCAGCTCTGCATATTGCCGCTAGGAAAGACGACACCAAATCTGCCGCACTTCTGCTTCAGAATGACCACAATGCTGACGTACAATCCAAGATG
176360_8716512_ANK2_1_1_9	CAGGGAGACCACGTGGAATGTGTGAAGCACCTGTTACAGCACAAGGCACCTGTTGATGATGTCACCCTAGACTACCTGACAGCCCTCCACGTTGCTGCGCACTGTGGCCACTACCGTGTA
176360_8716512_ANK2_1_1_13	GAACAGACACCTTTACATATTGCCTCCCGCCTGGGTAAGACAGAAATTGTCCAGCTGCTTCTACAACATATGGCTCATCCAGATGCGGCCACTACAAATGGGTACACACCACTGCACATC
176360_8716512_ANK2_1_1_17	GCAGAGACAAACATTGTGACAAAGCAAGGAGTAACTCCACTCCATCTGGCCTCGCAGGAGGGGCACACAGATATGGTTACCTTGCTTCTGGATAAGGGAGCCAATATCCACATGTCAACT
176360_8716512_ANK2_1_1_21	GTGGTCGACACCCTGAAGGTTGTGACTGAGGAGGTCACCACCACCACCACAACTATTACAGAAAAACACAAACTAAATGTACCTGAGACGATGACTGAGGTTCTTGATGTTTCTGATGAA
176360_8716512_ANK2_1_1_24	GTTGTGATTCCCAGTCACCAGGTGTCAACTCTAGCCAAGGAGGCAGAAAGGAATTCTTATCGCCTAAGCTGGGGCACTGAGAACTTAGACAACGTGGCTCTTTCTTCTAGTCCTATTCAT
176360_8716513_ANK2_26_1_1	TTTCCTGGTTAGTTTTATGGTGGATGCCCGAGGTGGTGCTATGCGAGGATGCAGACACAATGGGCTCCGAATCATTATTCCACCTCGGAAATGTACTGCTCCAACGCGAGTCACCTGCCG
176360_8716513_ANK2_26_1_5	CATGGATGAAGTACTGGATAGCCCAGAAGACCTAGAAAAGAAACGAATCTGCCGCATCATCACCCGAGACTTCCCACAGTACTTTGCAGTGGTGTCTCGTATCAAACAGGACAGCAATCT
176360_8716513_ANK2_26_1_9	TACGCCATTAACATTTGTCAATGAATGTGTTTCCTTTACAACAAACGTGTCTGCCAGGTTCTGGCTGATAGATTGTCGACAGATCCAGGAATCCGTTACTTTTGCATCACAAGTATACAG
176360_8716513_ANK2_26_1_13	ATCCACGAGAGGCCTGGTGCATCAAGCTATTTGCAACTTAAACATCACTTTGCCGATTTATACAAAGGAATCAGAGTCAGATCAAGAACAGGAGGAAGAGATCGATATGACATCAGAAAA
176360_8716514_ANK2_37_1_1	ATCCACAGGATGAGCAGGAACGGATCGAGGAAAGGCTGGCTTATATTGCTGATCACCTTGGCTTCAGCTGGACAGAATTAGCAAGAGAACTGGATTTCACTGAGGAGCAAATTCATCAAA
176360_8716514_ANK2_37_1_5	GGTTATTCCACTTTTCAGGATGGCGTCCCCAAAACTGAGGGGGACAGCTCAGCAACAGCACTCTTTCCCCAAACTCACAAGGAGCAAGTTCAACAGGATTTCTCAGGGAAAATGCAAGAC
176360_8716514_ANK2_37_1_10	TTATGGTGCAGGGAATGCCACAGGAACCTGTCAACATCGAGGAAGGGGATGGCTATTCCAAAGTTATAAAGCGTGTTGTATTGAAGAGTGACACCGAGCAGTCAGAGGACAACAATGAGT
176360_8716515_ARID1B_2_1_1	GGCAGCCCAATGGATCCAATGGTGATGAAGAGACCTCAGTTGTATGGCATGGGCAGTAACCCTCATTCTCAGCCTCAGCAGAGCAGTCCGTACCCAGGAGGTTCCTATGGCCCTCCAGGC
176360_8716516_ARID1B_3_1_1	ATGCCACCTCAGTATGGACAGCAAGGTGTGAGTGGTTACTGCCAGCAGGGCCAACAGCCATATTACAGCCAGCAGCCGCAGCCCCCGCACCTCCCACCCCAGGCGCAGTATCTGCCGTCC
176360_8716516_ARID1B_3_1_3	TACAGCAAGAAAGACCATCAAGTTTACCAGATCTGTCTGGCTCCATTGATGACCTCCCCACGGGAACGGAAGCAACTTTGAGCTCAGCAGTCAGTGCATCCGGGTCCACGAGCAGCCAAG
176360_8716516_ARID1B_3_1_7	CATGCTGGAATCAGTAGCTTTCAGCAGAGTAACTCAAGTGGGACTTACGGTCCACAGATGAGCCAGTATGGACCACAAGGTAACTACTCCAGACCCCCAGCGTATAGTGGGGTGCCCAGT
176360_8716516_ARID1B_3_1_11	CAGCCAGCCCATGAACAACAGCTCTAGCCTGATGAACACGCAGGCGCCGCCCTACAGCATGGCGCCCGCCATGGTGAACAGCTCGGCAGCATCTGTGGGTCTTGCAGATATGATGTCTCC
176360_8716516_ARID1B_3_1_15	CAAGCAGTGCAGCGAGCTCCCTGAAAAAGCAGTATATTCAGTACCTGTTTGCCTTTGAGTGCAAGATCGAACGTGGGGAGGAGCCCCCGCCGGAAGTCTTCAGCACCGGGGACACCAAAA
176360_8716516_ARID1B_3_1_19	CCTGGAAGCAGCGAGCCCTTTATGACGCAAGGACAGATGCCCAACAGCAGCATGCAGGACATGTACAACCAAAGTCCCTCCGGAGCAATGTCTAACCTGGGCATGGGGCAGCGCCAGCAG
176360_8716516_ARID1B_3_1_23	CCCGCCTCAGATGATGGGCGGCCCGCTGCAGTCGTCCTCCAGTGAGGGGCCTCAGCAGAATATGTGGGCAGCACGCAATGATATGCCTTATCCCTACCAGAACAGGCAGGGCCCTGGCGG
176360_8716516_ARID1B_3_1_28	TGGCGTGTGATGATGTCCCTTAAATCAGGTCTTTTGGCTGAGAGTACGTGGGCTTTGGACACTATTAATATTCTTCTGTATGATGACAGCACTGTTGCTACTTTCAATCTCTCCCAG
176360_8716517_GRIN2B_1_1_1	GGTATCTACAGCTGCATCCATGGGGTGGCGATCGAGGAGCGCCAGTCTGTAATGAACTCCCCCACCGCAACCATGAACAACACACACTCCAACATCCTGCGCCTGCTGCGCACGGCCAAG
176360_8716517_GRIN2B_1_1_5	CTGGACATCGGCCTCCCCTCCTCCAAGCACAGCCAGCTCAGTGACCTGTACGGCAAATTCTCCTTCAAGAGCGACCGCTACAGTGGCCACGACGACTTGATCCGCTCCGATGTCTCTGAC
176360_8716517_GRIN2B_1_1_9	ATCAAGCACGGGACGGGCGACAAACACGGCGTGGTCAGCGGGGTACCTGCACCTTGGGAGAAGAACCTGACCAACGTGGAGTGGGAGGACCGGTCCGGGGGCAACTTCTGCCGCAGCTGT
176360_8716517_GRIN2B_1_1_13	CCCTACGCCCACATGTTTGAGATGTCAGCTGGCGAGAGCACCTTTGCCAACAACAAGTCCTCAGTGCCCACTGCCGGACATCACCACCACAACAACCCCGGCGGCGGGTACATGCTCAGC
176360_8716517_GRIN2B_1_1_17	TGGAAGCTCTCTGGCTCACTGGCATTTGTCACAATGAGAAGAATGAGGTCATGAGCAGCCAGCTGGACATTGACAACATGGCAGGGGTCTTCTACATGTTGGGGGCGGCCATGGCTCTCA
176360_8716517_GRIN2B_1_1_21	CAGCACAGAGAGAAATATTCGCAATAACTATGCAGAAATGCATGCCTACATGGGAAAGTTCAACCAGAGGGGTGTAGATGATGCATTGCTCTCCCTGAAAACAGGAGCCTGGTGGACCCT
176360_8716517_GRIN2B_1_1_25	TGAAGAGGGCCTACATGGCAGTGGGCTCACTCACCATCAATGAGGAACGATCGGAGGTGGTCGACTTCTCTGTGCCCTTCATAGAGACAGGCATCAGTGTCATGGTGTCACGCAGCAATG
176360_8716517_GRIN2B_1_1_29	GAGTGGAACCTGCATGAGGAACACAGTCCCCTGCCAAAAACGCATAGTCACTGAGTATCTGATCAATGTCACTTTTGAGGGGAGGAATTTGTCCTTCAGTGAAGATGGCTACCAGATGCA
176360_8716517_GRIN2B_1_1_33	CACCTACATCTTTGAAGTGGCCAACTCAGTAGGGCTGACTGGCTATGGCTACACGTGGATCGTGCCCAGTCTGGTGGCAGGGGATACAGACACAGTGCCTGCGGAGTTCCCCACTGGGCT
176360_8716517_GRIN2B_1_1_38	GGGGTGGTGTTTGCTGATGACACAGACCAGGAAGCCATCGCCCAGATCCTCGATTTCATTTCAGCACAGACTCTCACCCCCATCCTGGGCATCCACGGGGGCTCCTCTATGATAATGGCA
176360_8716518_KDM6B_1_1_1	ATGCATCGGGCAGTGGACCCTCCAGGGGCCCGCGCTGCACGGGAAGCCTTTGCCCTTGGGGGCCTGAGCTGTGCTGGGGCCTGGAGCTCCTGCCCGCCTCATCCCCCTCCTCGTAGCGCA
176360_8716518_KDM6B_1_1_4	CTTGGGCAACTGTACGAGTCAGAGCACGATAGTGAGGAGGCCACACGCTGCTACCACAGCGCCCTTCGATACGGAGGAAGCTTCGCTGAGCTGGGGCCCCGCATTGGCCGACTGCAGCAG
176360_8716520_KDM6B_8_1_1	GAATGCCAAGGTGAAAGGGAAGTTTCGAGAGTCCTACCTTTCCCCTGCCCAGTCTGTGAAACCGAAGATCAACACTGAGGAGAAGCTGCCCCGGGAAAAACTCAACCCCCCTACACCCAG
176360_8716520_KDM6B_8_1_4	TCGGCAGATCTGGCCTTGTGAGAGCTCCCGTTCCCACACCACCATTGCCAAGTACGCACAGTACCAGGCCTCATCCTTCCAGGAGTCTCTGCAGGAGGAGAAGGAGAGTGAGGATGAGGA
176360_8716520_KDM6B_8_1_7	GCTGTACATGAAGGTGCCCGGCAGCCGAACGCCAGGCCACCAGGAGAATAACAACTTCTGCTCCGTCAACATCAACATTGGCCCAGGCGACTGCGAGTGGTTCGCGGTGCACGAGCACTA
176360_8716520_KDM6B_8_1_10	GTACCAGCTGGCCCTGGAACGATACGAGTGGAATGAGGTGAAGAACGTCAAATCCATCGTGCCCATGATTCACGTGTCATGGAACGTGGCTCGCACGGTCAAAATCAGCGACCCCGACTT
176360_8716520_KDM6B_8_1_14	CGGAGGAGGGCACTGGGGCAGGCTGCAGGGACGGGCTTCGGGAGCCCGGCCGCGCCTTTCCCTGAGCCCCCGCCGGCTTTCTCCCCCCAGGCCCCAGCCAGCACGTCGCGATGA
176360_8716521_DSCAM_1_1_1	GTGGTCCAGGCACCAGCAGGGACCTGAGCTTAGGACAAGCATGCTTGGAACCTCAGAAAAGCCGGACCCTGAAGCGCCCCACGGTCCTGGAGCCCATCCCGATGGAAGCCGCCTCCTCCG
176360_8716521_DSCAM_1_1_5	GGACAGTCTGACCTCCAGCACCCCTTCCGAATCGGGAATCTGCAGGTTCACTGCATCTCCCCCCAAACCTCAGGATGGAGGAAGAGTAATGAATATGGCAGTTCCAAAGGCACATCGGCC
176360_8716521_DSCAM_1_1_9	CGGACTTCAGATACGTTAAGCAAGCAACAGCAGACCCTGCGAATGCACATCGACATACCCAGGGCTCAGCTTTTGATTGAAGAGAGAGACACGATGGAGACCATTGATGCAAAGAGTTTA
176360_8716521_DSCAM_1_1_13	CTCCAAGTCCTACATCCTGTATGACCTGCAGGAAGCCACCTGGTATGAGCTGCAGATGCGGGTGTGCAACAGTGCGGGCTGCGCGGAGAAGCAGGCCAACTTCGCTACGCTGAACTACGA
176360_8716521_DSCAM_1_1_17	ATTCGCACGGTGAAAGCAGAAGACTCCGGCTATTACAGCTGCATTGCCAATAACAACTGGGGATCTGATGAAATTATTTTAAACTTACAAGTACAAGCTCCTGCACGAATCCTGACCTTC
176360_8716521_DSCAM_1_1_21	TCTGCTCCCACCCCTATCCCACAAGCTGGGTGAGATTAAAAACATCACCACCACACAGCCTTCACTGGAGCTGGACGGGCTGGAAAAGTACACCAACTACAGCATCCAGGTGCTGGCCTT
176360_8716521_DSCAM_1_1_25	CTCAGTACGGCCTGGTGGTGCAGGCCTGTAACCGGGCCGGCACGGGGCCTTCTTCTCAGGAAATCATCACCACCACTCTCGAGGATGCTCCTGATGGTCCACCTCAGGAAGTTCACCTGG
176360_8716521_DSCAM_1_1_29	CTGGTTTCTTTTCCTGCCATGCTATTAATTCTTATGGGGAGGACCGTGGAATAATTCAGCTCACAGTGCAAGTTCCTGCGATGATAACATCCTATCCAAATACTACCCTGGCCACGCAGG
176360_8716521_DSCAM_1_1_33	CGGGATTTATGGCAAAGCAGTCATCCTCAATTGTTCTGCTGAGGGTTACCCTGTACCTACCATCGTGTGGAAATTCTCTAAAGTTCCGCCTTTCATACAACCCTTTGAGTTTCCAAGATT
176360_8716521_DSCAM_1_1_37	CCTGCTTCCTTTCAACCACCGCCAAGTGGCATTTGAGAACAATGGAACTCTTAAACTTTCAGATGTGCAAAAGGAAGTGGACGAGGGGGAGTACACGTGCAACGTGTTGGTTCAACCACA
176360_8716521_DSCAM_1_1_41	CAGGAAGGTTAAAAGCAGCGTGGGTAGCCAAGTTTCCTTGTCCTGCAGCGTGACAGGAACTGAGGACCAGGAACTCTCCTGGTACCGCAATGGTGAAATCCTCAACCCTGGAAAAAATGT
176360_8716521_DSCAM_1_1_45	GTCCAACAGATACGGAACTGCTAAGGTGATAGGCCGCCTGTACGTGAAACGATCTAGATTTCTCATCACATCCACGGGAGCCTTGTATATTAAAGATGTACAGAATGAAGATGGATTGTA
176360_8716521_DSCAM_1_1_50	TTATTGCACAGCTGAAAATCCTTCAGGGAAAATTAGAAGTCAGGATGTCCACATCAAGGCTGATGTGGATACTGGCTCTCTCCTTGTTCCAGAGCTTCGCGAATG

## Sheet: Table S3
Table S3. Barcoded end sequences
>f_A1
AAGCAGTGGTATCAACGCAGAGTTACTAGAGTAGCACTCCATACGATTTAGGTGACACTATAGGG
>f_B1
AAGCAGTGGTATCAACGCAGAGTTGTGTATCAGTACATGCATACGATTTAGGTGACACTATAGGG
>f_C1
AAGCAGTGGTATCAACGCAGAGTACACGCATGACACACTCATACGATTTAGGTGACACTATAGGG
>f_D1
AAGCAGTGGTATCAACGCAGAGTGATCTCTACTATATGCCATACGATTTAGGTGACACTATAGGG
>f_E1
AAGCAGTGGTATCAACGCAGAGTATGATGTGCTACATCTCATACGATTTAGGTGACACTATAGGG
>f_F1
AAGCAGTGGTATCAACGCAGAGTCGTCTATATACGTATACATACGATTTAGGTGACACTATAGGG
>f_G1
AAGCAGTGGTATCAACGCAGAGTATAGAGACTCAGAGCTCATACGATTTAGGTGACACTATAGGG
>f_H1
AAGCAGTGGTATCAACGCAGAGTTAGATGCGAGAGTAGACATACGATTTAGGTGACACTATAGGG
>f_A2
AAGCAGTGGTATCAACGCAGAGTCATCACTACGCTAGATCATACGATTTAGGTGACACTATAGGG
>f_B2
AAGCAGTGGTATCAACGCAGAGTTATGTGATCGTCTCTCCATACGATTTAGGTGACACTATAGGG
>f_C2
AAGCAGTGGTATCAACGCAGAGTCGTGTCGCGCATATCTCATACGATTTAGGTGACACTATAGGG
>f_D2
AAGCAGTGGTATCAACGCAGAGTATATCAGTCATGCATACATACGATTTAGGTGACACTATAGGG
>f_E2
AAGCAGTGGTATCAACGCAGAGTGAGATCGACAGTCTCGCATACGATTTAGGTGACACTATAGGG
>f_F2
AAGCAGTGGTATCAACGCAGAGTCACGCACACACGCGCGCATACGATTTAGGTGACACTATAGGG
>f_G2
AAGCAGTGGTATCAACGCAGAGTGTAGTCTCGCACAGATCATACGATTTAGGTGACACTATAGGG
>f_H2
AAGCAGTGGTATCAACGCAGAGTGCTCGACTGTGAGAGACATACGATTTAGGTGACACTATAGGG
>f_A3
AAGCAGTGGTATCAACGCAGAGTAGAGATGTGTGATGACCATACGATTTAGGTGACACTATAGGG
>f_B3
AAGCAGTGGTATCAACGCAGAGTTACGACTACATATCAGCATACGATTTAGGTGACACTATAGGG
>f_C3
AAGCAGTGGTATCAACGCAGAGTTATCTCTGTAGAGTCTCATACGATTTAGGTGACACTATAGGG
>f_D3
AAGCAGTGGTATCAACGCAGAGTAGAGAGAGACATGCGCCATACGATTTAGGTGACACTATAGGG
>f_E3
AAGCAGTGGTATCAACGCAGAGTACTCTCGCTCTGTAGACATACGATTTAGGTGACACTATAGGG
>f_F3
AAGCAGTGGTATCAACGCAGAGTTCTATGTCTCAGTAGTCATACGATTTAGGTGACACTATAGGG
>f_G3
AAGCAGTGGTATCAACGCAGAGTGAGACTAGAGATAGTGCATACGATTTAGGTGACACTATAGGG
>f_H3
AAGCAGTGGTATCAACGCAGAGTTACGCGTGTACGCAGACATACGATTTAGGTGACACTATAGGG
>f_A4
AAGCAGTGGTATCAACGCAGAGTGCACATACACGCTCACCATACGATTTAGGTGACACTATAGGG
>f_B4
AAGCAGTGGTATCAACGCAGAGTACAGTGCGCTGTCTATCATACGATTTAGGTGACACTATAGGG
>f_C4
AAGCAGTGGTATCAACGCAGAGTTCACATATGTATACATCATACGATTTAGGTGACACTATAGGG
>f_D4
AAGCAGTGGTATCAACGCAGAGTACACACAGACTGTGAGCATACGATTTAGGTGACACTATAGGG
>f_E4
AAGCAGTGGTATCAACGCAGAGTTGCTCTCGTGTACTGTCATACGATTTAGGTGACACTATAGGG
>f_F4
AAGCAGTGGTATCAACGCAGAGTGTGTGAGATATATATCCATACGATTTAGGTGACACTATAGGG
>f_G4
AAGCAGTGGTATCAACGCAGAGTCTCAGTGTGACACATGCATACGATTTAGGTGACACTATAGGG
>f_H4
AAGCAGTGGTATCAACGCAGAGTAGATATCATCAGCGAGCATACGATTTAGGTGACACTATAGGG
>f_A5
AAGCAGTGGTATCAACGCAGAGTGTGCAGTGATCGATGACATACGATTTAGGTGACACTATAGGG
>f_B5
AAGCAGTGGTATCAACGCAGAGTTGACTCGCTCATAGTCCATACGATTTAGGTGACACTATAGGG
>f_C5
AAGCAGTGGTATCAACGCAGAGTATGCTGATGACGCGCTCATACGATTTAGGTGACACTATAGGG
>f_D5
AAGCAGTGGTATCAACGCAGAGTTCGATATACGACGTGCCATACGATTTAGGTGACACTATAGGG
>f_E5
AAGCAGTGGTATCAACGCAGAGTTCGTCATACGCTCTAGCATACGATTTAGGTGACACTATAGGG
>f_F5
AAGCAGTGGTATCAACGCAGAGTCGACTACGTACAGTAGCATACGATTTAGGTGACACTATAGGG
>f_G5
AAGCAGTGGTATCAACGCAGAGTGTCTGATAGATACAGACATACGATTTAGGTGACACTATAGGG
>f_H5
AAGCAGTGGTATCAACGCAGAGTCTGATGCGCGCTGTACCATACGATTTAGGTGACACTATAGGG
>f_A6
AAGCAGTGGTATCAACGCAGAGTACGTGAGCTCACTCGCCATACGATTTAGGTGACACTATAGGG
>f_B6
AAGCAGTGGTATCAACGCAGAGTATAGAGAGTGTCTCAGCATACGATTTAGGTGACACTATAGGG
>f_C6
AAGCAGTGGTATCAACGCAGAGTCATAGAGAGATAGTATCATACGATTTAGGTGACACTATAGGG
>f_D6
AAGCAGTGGTATCAACGCAGAGTATCTCGAGATGTAGCGCATACGATTTAGGTGACACTATAGGG
>f_E6
AAGCAGTGGTATCAACGCAGAGTGATCGACTCGAGCATCCATACGATTTAGGTGACACTATAGGG
>f_F6
AAGCAGTGGTATCAACGCAGAGTATGCTCACTACTACATCATACGATTTAGGTGACACTATAGGG
>f_G6
AAGCAGTGGTATCAACGCAGAGTCGTGCACATCTATAGCCATACGATTTAGGTGACACTATAGGG
>f_H6
AAGCAGTGGTATCAACGCAGAGTTATGACTAGTGTACTACATACGATTTAGGTGACACTATAGGG
>f_A7
AAGCAGTGGTATCAACGCAGAGTGACGTGTCGTAGATATCATACGATTTAGGTGACACTATAGGG
>f_B7
AAGCAGTGGTATCAACGCAGAGTATAGCGACGCGATATACATACGATTTAGGTGACACTATAGGG
>f_C7
AAGCAGTGGTATCAACGCAGAGTATCGCTGTGTCTATAGCATACGATTTAGGTGACACTATAGGG
>f_D7
AAGCAGTGGTATCAACGCAGAGTTGTCGTCTATCATGTACATACGATTTAGGTGACACTATAGGG
>f_E7
AAGCAGTGGTATCAACGCAGAGTCACACGAGATCTCATCCATACGATTTAGGTGACACTATAGGG
>f_F7
AAGCAGTGGTATCAACGCAGAGTCGTGAGTAGTCAGACGCATACGATTTAGGTGACACTATAGGG
>f_G7
AAGCAGTGGTATCAACGCAGAGTTCTCGACTGCACATATCATACGATTTAGGTGACACTATAGGG
>f_H7
AAGCAGTGGTATCAACGCAGAGTTATACACACTCGCTCGCATACGATTTAGGTGACACTATAGGG
>f_A8
AAGCAGTGGTATCAACGCAGAGTGTCGTAGCTGCTGTATCATACGATTTAGGTGACACTATAGGG
>f_B8
AAGCAGTGGTATCAACGCAGAGTCTGTACTAGAGCGTCTCATACGATTTAGGTGACACTATAGGG
>f_C8
AAGCAGTGGTATCAACGCAGAGTTCGAGTGTATAGCTCACATACGATTTAGGTGACACTATAGGG
>f_D8
AAGCAGTGGTATCAACGCAGAGTACTGTGACAGTATGATCATACGATTTAGGTGACACTATAGGG
>f_E8
AAGCAGTGGTATCAACGCAGAGTTGTCTGAGACGCATACCATACGATTTAGGTGACACTATAGGG
>f_F8
AAGCAGTGGTATCAACGCAGAGTATCGCATCGCAGAGACCATACGATTTAGGTGACACTATAGGG
>f_G8
AAGCAGTGGTATCAACGCAGAGTTACTCATATATGCTACCATACGATTTAGGTGACACTATAGGG
>f_H8
AAGCAGTGGTATCAACGCAGAGTGTAGAGTGATCGCGTCCATACGATTTAGGTGACACTATAGGG
>f_A9
AAGCAGTGGTATCAACGCAGAGTACGACAGTCAGAGTATCATACGATTTAGGTGACACTATAGGG
>f_B9
AAGCAGTGGTATCAACGCAGAGTATATATAGCTGATGCGCATACGATTTAGGTGACACTATAGGG
>f_C9
AAGCAGTGGTATCAACGCAGAGTTGCTATCTGAGATACTCATACGATTTAGGTGACACTATAGGG
>f_D9
AAGCAGTGGTATCAACGCAGAGTCAGCAGATCATGTCGACATACGATTTAGGTGACACTATAGGG
>f_E9
AAGCAGTGGTATCAACGCAGAGTACTATCGCAGCTCAGTCATACGATTTAGGTGACACTATAGGG
>f_F9
AAGCAGTGGTATCAACGCAGAGTCGTCTCTCGTCTGTGCCATACGATTTAGGTGACACTATAGGG
>f_G9
AAGCAGTGGTATCAACGCAGAGTGAGTCTCGATATACTACATACGATTTAGGTGACACTATAGGG
>f_H9
AAGCAGTGGTATCAACGCAGAGTTCTGTCGATATACACTCATACGATTTAGGTGACACTATAGGG
>f_A10
AAGCAGTGGTATCAACGCAGAGTACGTGCTCTATAGAGACATACGATTTAGGTGACACTATAGGG
>f_B10
AAGCAGTGGTATCAACGCAGAGTTATCAGCACGACATGCCATACGATTTAGGTGACACTATAGGG
>f_C10
AAGCAGTGGTATCAACGCAGAGTGCTCTCACGATATCAGCATACGATTTAGGTGACACTATAGGG
>f_D10
AAGCAGTGGTATCAACGCAGAGTTCTCATGTGTGAGCTACATACGATTTAGGTGACACTATAGGG
>f_E10
AAGCAGTGGTATCAACGCAGAGTCGTAGCTCAGACACTCCATACGATTTAGGTGACACTATAGGG
>f_F10
AAGCAGTGGTATCAACGCAGAGTTCAGAGACACTACGAGCATACGATTTAGGTGACACTATAGGG
>f_G10
AAGCAGTGGTATCAACGCAGAGTATCGAGCAGCAGTCGTCATACGATTTAGGTGACACTATAGGG
>f_H10
AAGCAGTGGTATCAACGCAGAGTGCTAGTCGATGACAGCCATACGATTTAGGTGACACTATAGGG
>f_A11
AAGCAGTGGTATCAACGCAGAGTGTCTCTCTCTCACGCACATACGATTTAGGTGACACTATAGGG
>f_B11
AAGCAGTGGTATCAACGCAGAGTACACACTCTATCAGATCATACGATTTAGGTGACACTATAGGG
>f_C11
AAGCAGTGGTATCAACGCAGAGTAGCGTAGCATCTGAGCCATACGATTTAGGTGACACTATAGGG
>f_D11
AAGCAGTGGTATCAACGCAGAGTCTACGATGCTATGTATCATACGATTTAGGTGACACTATAGGG
>f_E11
AAGCAGTGGTATCAACGCAGAGTCGACTAGATCTATCATCATACGATTTAGGTGACACTATAGGG
>f_F11
AAGCAGTGGTATCAACGCAGAGTAGTCGTGACTATGCTCCATACGATTTAGGTGACACTATAGGG
>f_G11
AAGCAGTGGTATCAACGCAGAGTGTATAGACAGATGTGCCATACGATTTAGGTGACACTATAGGG
>f_H11
AAGCAGTGGTATCAACGCAGAGTGCACTCAGAGACGCGACATACGATTTAGGTGACACTATAGGG
>f_A12
AAGCAGTGGTATCAACGCAGAGTCACGACTATATGCTCTCATACGATTTAGGTGACACTATAGGG
>f_B12
AAGCAGTGGTATCAACGCAGAGTAGTCACACGCACGCTGCATACGATTTAGGTGACACTATAGGG
>f_C12
AAGCAGTGGTATCAACGCAGAGTCATACATCGCGCAGTACATACGATTTAGGTGACACTATAGGG
>f_D12
AAGCAGTGGTATCAACGCAGAGTCTATCTAGCACTCACACATACGATTTAGGTGACACTATAGGG
>f_E12
AAGCAGTGGTATCAACGCAGAGTACACGTGATAGCTACGCATACGATTTAGGTGACACTATAGGG
>f_F12
AAGCAGTGGTATCAACGCAGAGTCGCTAGAGATCTGCTACATACGATTTAGGTGACACTATAGGG
>f_G12
AAGCAGTGGTATCAACGCAGAGTGATACTGACACACTATCATACGATTTAGGTGACACTATAGGG
>f_H12
AAGCAGTGGTATCAACGCAGAGTGAGCTGATGTACATGTCATACGATTTAGGTGACACTATAGGG
>r_A1
GAGTGCTACTCTAGTAACTCTGCGTTGATACCACTGCTT
>r_B1
CATGTACTGATACACAACTCTGCGTTGATACCACTGCTT
>r_C1
AGTGTGTCATGCGTGTACTCTGCGTTGATACCACTGCTT
>r_D1
GCATATAGTAGAGATCACTCTGCGTTGATACCACTGCTT
>r_E1
CAGCAGTATAGACTGTACTCTGCGTTGATACCACTGCTT
>r_F1
AGATGTAGCACATCATACTCTGCGTTGATACCACTGCTT
>r_G1
CGATCAGCTGAGCGCGACTCTGCGTTGATACCACTGCTT
>r_H1
GTCGCGACGTCAGTGTACTCTGCGTTGATACCACTGCTT
>r_A2
TATACGTATATAGACGACTCTGCGTTGATACCACTGCTT
>r_B2
AGCTCTGAGTCTCTATACTCTGCGTTGATACCACTGCTT
>r_C2
TCTACTCTCGCATCTAACTCTGCGTTGATACCACTGCTT
>r_D2
CACGATAGTCGCTATGACTCTGCGTTGATACCACTGCTT
>r_E2
ATCTAGCGTAGTGATGACTCTGCGTTGATACCACTGCTT
>r_F2
TGCATGCACAGATGCGACTCTGCGTTGATACCACTGCTT
>r_G2
GAGAGACGATCACATAACTCTGCGTTGATACCACTGCTT
>r_H2
AGATATGCGCGACACGACTCTGCGTTGATACCACTGCTT
>r_A3
TATGCATGACTGATATACTCTGCGTTGATACCACTGCTT
>r_B3
CGAGACTGTCGATCTCACTCTGCGTTGATACCACTGCTT
>r_C3
CGCGCGTGTGTGCGTGACTCTGCGTTGATACCACTGCTT
>r_D3
CACACGCGCGTGCTCGACTCTGCGTTGATACCACTGCTT
>r_E3
ATCTGTGCGAGACTACACTCTGCGTTGATACCACTGCTT
>r_F3
TCTCTCACAGTCGAGCACTCTGCGTTGATACCACTGCTT
>r_G3
GTCATCACACATCTCTACTCTGCGTTGATACCACTGCTT
>r_H3
CTGATATGTAGTCGTAACTCTGCGTTGATACCACTGCTT
>r_A4
AGACTCTACAGAGATAACTCTGCGTTGATACCACTGCTT
>r_B4
GCGCATGTCTCTCTCTACTCTGCGTTGATACCACTGCTT
>r_C4
TCTACAGAGCGAGAGTACTCTGCGTTGATACCACTGCTT
>r_D4
ACTACTGAGACATAGAACTCTGCGTTGATACCACTGCTT
>r_E4
TGTGATACTGCGAGCAACTCTGCGTTGATACCACTGCTT
>r_F4
ACTCTATCACACACAGACTCTGCGTTGATACCACTGCTT
>r_G4
TATCGCGCTCTCACTGACTCTGCGTTGATACCACTGCTT
>r_H4
CACTATCTCTAGTCTCACTCTGCGTTGATACCACTGCTT
>r_A5
TCTGCGTACACGCGTAACTCTGCGTTGATACCACTGCTT
>r_B5
GTGAGCGTGTATGTGCACTCTGCGTTGATACCACTGCTT
>r_C5
ATAGACAGCGCACTGTACTCTGCGTTGATACCACTGCTT
>r_D5
ATGTATACATATGTGAACTCTGCGTTGATACCACTGCTT
>r_E5
CTCACAGTCTGTGTGTACTCTGCGTTGATACCACTGCTT
>r_F5
ACAGTACACGAGAGCAACTCTGCGTTGATACCACTGCTT
>r_G5
GATATATATCTCACACACTCTGCGTTGATACCACTGCTT
>r_H5
CATGTGTCACACTGAGACTCTGCGTTGATACCACTGCTT
>r_A6
GCTGACACTAGCTGACACTCTGCGTTGATACCACTGCTT
>r_B6
CTCGCTGATGATATCTACTCTGCGTTGATACCACTGCTT
>r_C6
TCATCGATCACTGCACACTCTGCGTTGATACCACTGCTT
>r_D6
GACTATGAGCGAGTCAACTCTGCGTTGATACCACTGCTT
>r_E6
GCACGTCGTATATCGAACTCTGCGTTGATACCACTGCTT
>r_F6
CTAGAGCGTATGACGAACTCTGCGTTGATACCACTGCTT
>r_G6
CTACTGTACGTAGTCGACTCTGCGTTGATACCACTGCTT
>r_H6
TCTGTATCTATCAGACACTCTGCGTTGATACCACTGCTT
>r_A7
GTGAGTCAGAGATCTAACTCTGCGTTGATACCACTGCTT
>r_B7
GTACAGCGCGCATCAGACTCTGCGTTGATACCACTGCTT
>r_C7
GCATCGTGCACGAGTGACTCTGCGTTGATACCACTGCTT
>r_D7
GCGAGTGAGCTCACGTACTCTGCGTTGATACCACTGCTT
>r_E7
CTGAGACACTCTCTATACTCTGCGTTGATACCACTGCTT
>r_F7
ATACTATCTCTCTATGACTCTGCGTTGATACCACTGCTT
>r_G7
CGCTACATCTCGAGATACTCTGCGTTGATACCACTGCTT
>r_H7
TGACACGAGTGATCGTACTCTGCGTTGATACCACTGCTT
>r_A8
GATGCTCGAGTCGATCACTCTGCGTTGATACCACTGCTT
>r_B8
ATGTAGTAGTGAGCATACTCTGCGTTGATACCACTGCTT
>r_C8
GCTATAGATGTGCACGACTCTGCGTTGATACCACTGCTT
>r_D8
TCGTGCATGTGCAGTCACTCTGCGTTGATACCACTGCTT
>r_E8
TAGTACACTAGTCATAACTCTGCGTTGATACCACTGCTT
>r_F8
ATATCTACGACACGTCACTCTGCGTTGATACCACTGCTT
>r_G8
TATATCGCGTCGCTATACTCTGCGTTGATACCACTGCTT
>r_H8
CTATAGACACAGCGATACTCTGCGTTGATACCACTGCTT
>r_A9
CACGCTATCAGTGAGAACTCTGCGTTGATACCACTGCTT
>r_B9
TACATGATAGACGACAACTCTGCGTTGATACCACTGCTT
>r_C9
GATGAGATCTCGTGTGACTCTGCGTTGATACCACTGCTT
>r_D9
AGTATCATGTGTATCTACTCTGCGTTGATACCACTGCTT
>r_E9
CGTCTGACTACTCACGACTCTGCGTTGATACCACTGCTT
>r_F9
ATATGTGCAGTCGAGAACTCTGCGTTGATACCACTGCTT
>r_G9
AGCAGCTACGATCGTAACTCTGCGTTGATACCACTGCTT
>r_H9
CGAGCGAGTGTGTATAACTCTGCGTTGATACCACTGCTT
>r_A10
ATACAGCAGCTACGACACTCTGCGTTGATACCACTGCTT
>r_B10
AGACGCTCTAGTACAGACTCTGCGTTGATACCACTGCTT
>r_C10
TGAGCTATACACTCGAACTCTGCGTTGATACCACTGCTT
>r_D10
ATCATACTGTCACAGTACTCTGCGTTGATACCACTGCTT
>r_E10
GTATGCGTCTCAGACAACTCTGCGTTGATACCACTGCTT
>r_F10
ATATCACACGTGAGTGACTCTGCGTTGATACCACTGCTT
>r_G10
GTCTCTGCGATGCGATACTCTGCGTTGATACCACTGCTT
>r_H10
GTAGCATATATGAGTAACTCTGCGTTGATACCACTGCTT
>r_A11
ACATCAGAGAGATCTGACTCTGCGTTGATACCACTGCTT
>r_B11
GACGCGATCACTCTACACTCTGCGTTGATACCACTGCTT
>r_C11
ATACTCTGACTGTCGTACTCTGCGTTGATACCACTGCTT
>r_D11
AGTATCTCAGATAGCAACTCTGCGTTGATACCACTGCTT
>r_E11
TCGACATGATCTGCTGACTCTGCGTTGATACCACTGCTT
>r_F11
ACTGAGCTGCGATAGTACTCTGCGTTGATACCACTGCTT
>r_G11
TAGTATATCGAGACTCACTCTGCGTTGATACCACTGCTT
>r_H11
GTGTGTACACATGACAACTCTGCGTTGATACCACTGCTT
>r_A12
AGTGTATATCGACAGAACTCTGCGTTGATACCACTGCTT
>r_B12
TCTCTATAGAGCACGTACTCTGCGTTGATACCACTGCTT
>r_C12
GCATGTCGTGCTGATAACTCTGCGTTGATACCACTGCTT
>r_D12
CTGATATCGTGAGAGCACTCTGCGTTGATACCACTGCTT
>r_E12
TAGCTCACACATGAGAACTCTGCGTTGATACCACTGCTT
>r_F12
CTCGCGACACATCTGAACTCTGCGTTGATACCACTGCTT
>r_G12
GAGTGTCTGAGCTACGACTCTGCGTTGATACCACTGCTT
>r_H12
CTCGTAGTGTCTCTGAACTCTGCGTTGATACCACTGCTT

## Sheet: Table S4
Table S4. SMRT cells sequenced
Probe Panel	RNA source	SMRT cell	Movie name/description
unenriched	fetal brain	m160213_030055_42134_c100957952550000001823213806221632_s1_p0	IsoSeq_FS_JU-movie1
unenriched	fetal brain	m160213_030055_42134_c100957952550000001823213806221632_s1_p0	IsoSeq_FS_JU-movie2
unenriched	fetal brain	m160213_030055_42134_c100957952550000001823213806221632_s1_p0	IsoSeq_FS_JU-movie3
unenriched	fetal brain	m160213_153305_42134_c100957952550000001823213806221634_s1_p0	IsoSeq_FC_JU-movie1
unenriched	fetal brain	m160213_153305_42134_c100957952550000001823213806221634_s1_p0	IsoSeq_FC_JU-movie2
unenriched	fetal brain	m160213_153305_42134_c100957952550000001823213806221634_s1_p0	IsoSeq_FC_JU-movie3
unenriched	adult brain	m160213_091647_42134_c100957952550000001823213806221633_s1_p0	IsoSeq_AS_JU-movie1
unenriched	adult brain	m160213_091647_42134_c100957952550000001823213806221633_s1_p0	IsoSeq_AS_JU-movie2
unenriched	adult brain	m160213_091647_42134_c100957952550000001823213806221633_s1_p0	IsoSeq_AS_JU-movie3
unenriched	adult brain	m160213_214921_42134_c100957952550000001823213806221635_s1_p0	IsoSeq_AC_JU-movie1
unenriched	adult brain	m160213_214921_42134_c100957952550000001823213806221635_s1_p0	IsoSeq_AC_JU-movie2
unenriched	adult brain	m160213_214921_42134_c100957952550000001823213806221635_s1_p0	IsoSeq_AC_JU-movie3
HSD1	adult brain	m160614_013904_42139_c100966090630000001823217407061600_s1_p0	adult_brain_elf_6-A-movie1
HSD1	adult brain	m160614_013904_42139_c100966090630000001823217407061600_s1_p0	adult_brain_elf_6-A-movie2
HSD1	adult brain	m160614_013904_42139_c100966090630000001823217407061600_s1_p0	adult_brain_elf_6-A-movie3
HSD1	adult brain	m160614_075731_42139_c100966090630000001823217407061601_s1_p0	adult_brain_elf_7-A-movie1
HSD1	adult brain	m160614_075731_42139_c100966090630000001823217407061601_s1_p0	adult_brain_elf_7-A-movie2
HSD1	adult brain	m160614_075731_42139_c100966090630000001823217407061601_s1_p0	adult_brain_elf_7-A-movie3
HSD1	adult brain	m160614_141925_42139_c100966090630000001823217407061602_s1_p0	adult_brain_elf_8-A-movie1
HSD1	adult brain	m160614_141925_42139_c100966090630000001823217407061602_s1_p0	adult_brain_elf_8-A-movie2
HSD1	adult brain	m160614_141925_42139_c100966090630000001823217407061602_s1_p0	adult_brain_elf_8-A-movie3
HSD1	adult brain	m160614_203953_42139_c100966090630000001823217407061603_s1_p0	adult_brain_elf_9-A-movie1
HSD1	adult brain	m160614_203953_42139_c100966090630000001823217407061603_s1_p0	adult_brain_elf_9-A-movie2
HSD1	adult brain	m160614_203953_42139_c100966090630000001823217407061603_s1_p0	adult_brain_elf_9-A-movie3
HSD1	adult brain	m160226_223848_42134_c100969612550000001823215707061691_s1_p0	adult_brain_amp_0.4x-A-movie1
HSD1	adult brain	m160226_223848_42134_c100969612550000001823215707061691_s1_p0	adult_brain_amp_0.4x-A-movie2
HSD1	adult brain	m160226_223848_42134_c100969612550000001823215707061691_s1_p0	adult_brain_amp_0.4x-A-movie3
HSD1	adult brain	m160410_030309_42134_c100991602550000001823221607191632_s1_p0	adult_brain_amp_0.4x-B-movie1
HSD1	adult brain	m160410_030309_42134_c100991602550000001823221607191632_s1_p0	adult_brain_amp_0.4x-B-movie2
HSD1	adult brain	m160410_030309_42134_c100991602550000001823221607191632_s1_p0	adult_brain_amp_0.4x-B-movie3
HSD1	adult brain	m160410_091947_42134_c100991602550000001823221607191633_s1_p0	adult_brain_amp_0.4x-C-movie1
HSD1	adult brain	m160410_091947_42134_c100991602550000001823221607191633_s1_p0	adult_brain_amp_0.4x-C-movie2
HSD1	adult brain	m160410_091947_42134_c100991602550000001823221607191633_s1_p0	adult_brain_amp_0.4x-C-movie3
HSD1	adult brain	m160410_153941_42134_c100991602550000001823221607191634_s1_p0	adult_brain_amp_0.4x-D-movie1
HSD1	adult brain	m160410_153941_42134_c100991602550000001823221607191634_s1_p0	adult_brain_amp_0.4x-D-movie2
HSD1	adult brain	m160410_153941_42134_c100991602550000001823221607191634_s1_p0	adult_brain_amp_0.4x-D-movie3
HSD1	adult brain	m160511_012116_42134_c100977902550000001823223308031671_s1_p0	adult_brain_elf_78-B-movie1
HSD1	adult brain	m160511_012116_42134_c100977902550000001823223308031671_s1_p0	adult_brain_elf_78-B-movie2
HSD1	adult brain	m160511_012116_42134_c100977902550000001823223308031671_s1_p0	adult_brain_elf_78-B-movie3
HSD1	adult brain	m160416_210737_42134_c100991652550000001823221607191683_s1_p0	adult_brain_elf_78-A-movie1
HSD1	adult brain	m160416_210737_42134_c100991652550000001823221607191683_s1_p0	adult_brain_elf_78-A-movie2
HSD1	adult brain	m160416_210737_42134_c100991652550000001823221607191683_s1_p0	adult_brain_elf_78-A-movie3
HSD1	adult brain	m160226_100605_42134_c100946382550000001823214306251677_s1_p0	adult_brain_amp_0.6x-movie1
HSD1	adult brain	m160226_100605_42134_c100946382550000001823214306251677_s1_p0	adult_brain_amp_0.6x-movie2
HSD1	adult brain	m160226_100605_42134_c100946382550000001823214306251677_s1_p0	adult_brain_amp_0.6x-movie3
HSD1	adult brain	m160619_122419_42134_c101009602550000001823230710211661_s1_p0	adult_brain_elf_6-B-movie1
HSD1	adult brain	m160619_122419_42134_c101009602550000001823230710211661_s1_p0	adult_brain_elf_6-B-movie2
HSD1	adult brain	m160619_122419_42134_c101009602550000001823230710211661_s1_p0	adult_brain_elf_6-B-movie3
HSD1	adult brain	m160621_233748_42134_c101009382550000001823230410211661_s1_p0	adult_brain_elf_7-B-movie1
HSD1	adult brain	m160621_233748_42134_c101009382550000001823230410211661_s1_p0	adult_brain_elf_7-B-movie2
HSD1	adult brain	m160621_233748_42134_c101009382550000001823230410211661_s1_p0	adult_brain_elf_7-B-movie3
HSD1	adult brain	m160622_143919_42134_c101009382550000001823230410211664_s1_p0	adult_brain_elf_8-B-movie1
HSD1	adult brain	m160622_143919_42134_c101009382550000001823230410211664_s1_p0	adult_brain_elf_8-B-movie2
HSD1	adult brain	m160622_143919_42134_c101009382550000001823230410211664_s1_p0	adult_brain_elf_8-B-movie3
HSD1	adult brain	m160701_124807_42134_c101025152550000001823232111041602_s1_p0	adult_brain_elf_9-B-movie1
HSD1	adult brain	m160701_124807_42134_c101025152550000001823232111041602_s1_p0	adult_brain_elf_9-B-movie2
HSD1	adult brain	m160701_124807_42134_c101025152550000001823232111041602_s1_p0	adult_brain_elf_9-B-movie3
HSD1	fetal brain	m160615_030030_42139_c100966090630000001823217407061604_s1_p0	fetal_brain_amp_0.4x-B-movie1
HSD1	fetal brain	m160615_030030_42139_c100966090630000001823217407061604_s1_p0	fetal_brain_amp_0.4x-A-movie1
HSD1	fetal brain	m160615_030030_42139_c100966090630000001823217407061604_s1_p0	fetal_brain_amp_0.4x-C-movie1
HSD1	fetal brain	m160615_092105_42139_c100966090630000001823217407061605_s1_p0	fetal_brain_amp_0.4x-D-movie1
HSD1	fetal brain	m160615_092105_42139_c100966090630000001823217407061605_s1_p0	fetal_brain_elf_78-B-movie1
HSD1	fetal brain	m160615_092105_42139_c100966090630000001823217407061605_s1_p0	fetal_brain_elf_78-A-movie1
HSD1	fetal brain	m160615_154414_42139_c100961261270000001823212707011620_s1_p0	fetal_brain_amp_0.6x-movie1
HSD1	fetal brain	m160615_154414_42139_c100961261270000001823212707011620_s1_p0	fetal_brain_elf_6-A-movie1
HSD1	fetal brain	m160615_154414_42139_c100961261270000001823212707011620_s1_p0	fetal_brain_elf_6-B-movie1
HSD1	fetal brain	m160615_220452_42139_c100961261270000001823212707011621_s1_p0	fetal_brain_elf_7-A-movie1
HSD1	fetal brain	m160615_220452_42139_c100961261270000001823212707011621_s1_p0	fetal_brain_elf_7-B-movie1
HSD1	fetal brain	m160615_220452_42139_c100961261270000001823212707011621_s1_p0	fetal_brain_elf_8-A-movie1
HSD1	fetal brain	m160226_034933_42134_c100946382550000001823214306251676_s1_p0	fetal_brain_elf_8-B-movie1
HSD1	fetal brain	m160226_034933_42134_c100946382550000001823214306251676_s1_p0	fetal_brain_elf_9-A-movie1
HSD1	fetal brain	m160226_034933_42134_c100946382550000001823214306251676_s1_p0	fetal_brain_elf_9-B-movie1
HSD1	fetal brain	m160226_162210_42134_c100969612550000001823215707061690_s1_p0	fetal_brain_amp_0.4x-B-movie2
HSD1	fetal brain	m160226_162210_42134_c100969612550000001823215707061690_s1_p0	fetal_brain_amp_0.4x-A-movie2
HSD1	fetal brain	m160226_162210_42134_c100969612550000001823215707061690_s1_p0	fetal_brain_amp_0.4x-C-movie2
HSD1	fetal brain	m160409_081409_42134_c100991582550000001823221607191687_s1_p0	fetal_brain_amp_0.4x-D-movie2
HSD1	fetal brain	m160409_081409_42134_c100991582550000001823221607191687_s1_p0	fetal_brain_elf_78-B-movie2
HSD1	fetal brain	m160409_081409_42134_c100991582550000001823221607191687_s1_p0	fetal_brain_elf_78-A-movie2
HSD1	fetal brain	m160409_143034_42134_c100991602550000001823221607191630_s1_p0	fetal_brain_amp_0.6x-movie2
HSD1	fetal brain	m160409_143034_42134_c100991602550000001823221607191630_s1_p0	fetal_brain_elf_6-A-movie2
HSD1	fetal brain	m160409_143034_42134_c100991602550000001823221607191630_s1_p0	fetal_brain_elf_6-B-movie2
HSD1	fetal brain	m160409_204649_42134_c100991602550000001823221607191631_s1_p0	fetal_brain_elf_7-A-movie2
HSD1	fetal brain	m160409_204649_42134_c100991602550000001823221607191631_s1_p0	fetal_brain_elf_7-B-movie2
HSD1	fetal brain	m160409_204649_42134_c100991602550000001823221607191631_s1_p0	fetal_brain_elf_8-A-movie2
HSD1	fetal brain	m160416_145117_42134_c100991652550000001823221607191682_s1_p0	fetal_brain_elf_8-B-movie2
HSD1	fetal brain	m160416_145117_42134_c100991652550000001823221607191682_s1_p0	fetal_brain_elf_9-A-movie2
HSD1	fetal brain	m160416_145117_42134_c100991652550000001823221607191682_s1_p0	fetal_brain_elf_9-B-movie2
HSD1	fetal brain	m160510_190442_42134_c100977902550000001823223308031670_s1_p0	fetal_brain_amp_0.4x-B-movie3
HSD1	fetal brain	m160510_190442_42134_c100977902550000001823223308031670_s1_p0	fetal_brain_amp_0.4x-A-movie3
HSD1	fetal brain	m160510_190442_42134_c100977902550000001823223308031670_s1_p0	fetal_brain_amp_0.4x-C-movie3
HSD1	fetal brain	m160619_061122_42134_c101009602550000001823230710211660_s1_p0	fetal_brain_amp_0.4x-D-movie3
HSD1	fetal brain	m160619_061122_42134_c101009602550000001823230710211660_s1_p0	fetal_brain_elf_78-B-movie3
HSD1	fetal brain	m160619_061122_42134_c101009602550000001823230710211660_s1_p0	fetal_brain_elf_78-A-movie3
HSD1	fetal brain	m160618_213601_42134_c101009522550000001823230710211677_s1_p0	fetal_brain_amp_0.6x-movie3
HSD1	fetal brain	m160618_213601_42134_c101009522550000001823230710211677_s1_p0	fetal_brain_elf_6-A-movie3
HSD1	fetal brain	m160618_213601_42134_c101009522550000001823230710211677_s1_p0	fetal_brain_elf_6-B-movie3
HSD1	fetal brain	m160701_001557_42134_c101025152550000001823232111041600_s1_p0	fetal_brain_elf_7-A-movie3
HSD1	fetal brain	m160701_001557_42134_c101025152550000001823232111041600_s1_p0	fetal_brain_elf_7-B-movie3
HSD1	fetal brain	m160701_001557_42134_c101025152550000001823232111041600_s1_p0	fetal_brain_elf_8-A-movie3
HSD1	fetal brain	m160701_063435_42134_c101025152550000001823232111041601_s1_p0	fetal_brain_elf_8-B-movie3
HSD1	fetal brain	m160701_063435_42134_c101025152550000001823232111041601_s1_p0	fetal_brain_elf_9-A-movie3
HSD1	fetal brain	m160701_063435_42134_c101025152550000001823232111041601_s1_p0	fetal_brain_elf_9-B-movie3
HSD2	fetal brain	m170527_015245_42134_c101190302550000001823271509291792_s1_p0	Fetal_HSD2_.2-movie1
HSD2	fetal brain	m170527_015245_42134_c101190302550000001823271509291792_s1_p0	Fetal_HSD2_.2-movie2
HSD2	fetal brain	m170527_015245_42134_c101190302550000001823271509291792_s1_p0	Fetal_HSD2_.2-movie3
HSD2	adult brain	m170527_081100_42134_c101190302550000001823271509291793_s1_p0	Adult_HSD2_.2-movie1
HSD2	adult brain	m170527_081100_42134_c101190302550000001823271509291793_s1_p0	Adult_HSD2_.2-movie2
HSD2	adult brain	m170527_081100_42134_c101190302550000001823271509291793_s1_p0	Adult_HSD2_.2-movie3
HSD2	fetal brain	m170507_073233_42134_c101190152550000001823271509291706_s1_p0	fetal_hsd2_minus-movie1
HSD2	fetal brain	m170507_073233_42134_c101190152550000001823271509291706_s1_p0	fetal_hsd2_minus-movie2
HSD2	fetal brain	m170507_073233_42134_c101190152550000001823271509291706_s1_p0	fetal_hsd2_minus-movie3
HSD2	fetal brain	m170507_135004_42134_c101190152550000001823271509291707_s1_p0	fetal_hsd2_plus-movie1
HSD2	fetal brain	m170507_135004_42134_c101190152550000001823271509291707_s1_p0	fetal_hsd2_plus-movie2
HSD2	fetal brain	m170507_135004_42134_c101190152550000001823271509291707_s1_p0	fetal_hsd2_plus-movie3
HSD2	adult brain	m170507_200337_42134_c101190172550000001823271509291780_s1_p0	adult_hsd2_minus-movie1
HSD2	adult brain	m170507_200337_42134_c101190172550000001823271509291780_s1_p0	adult_hsd2_minus-movie2
HSD2	adult brain	m170507_200337_42134_c101190172550000001823271509291780_s1_p0	adult_hsd2_minus-movie3
HSD2	adult brain	m170508_043407_42134_c101190172550000001823271509291781_s1_p0	adult_hsd2_plus-movie1
HSD2	adult brain	m170508_043407_42134_c101190172550000001823271509291781_s1_p0	adult_hsd2_plus-movie2
HSD2	adult brain	m170508_043407_42134_c101190172550000001823271509291781_s1_p0	adult_hsd2_plus-movie3

## Sheet: Table S5
Table S5. Summary sequence statistics
Probe panel	RNA source	SMRT cells sequenced	CCSs	putative full-length reads	on target rate*	enrichment
Unenriched	adult brain	2	92906	84348	0.122%, 0.058%	n/a
Unenriched	fetal brain	2	91908	85597	0.080%, 0.052%	n/a
HSD1	adult brain	15	572266	468425	0.708	580x
HSD1	fetal brain	15	488252	376375	0.649	811x
HSD2	adult brain	3	107364	102944	0.882	1521x
HSD2	fetal brain	3	81394	77787	0.902	1735x
*mapped putative full-length reads; for unenriched samples, percentages refer to HSD1 and HSD2, respectively; CCS: circular consensus sequence

## Sheet: Table S6
Table S6. Analyzed gene set
							Counts
							Probe-enriched all		Unenriched control		Fetal only enriched		Adult only enriched
Family	Paraloga	Stateb	Duplication type	Segment of gene duplicated	New featuresc	Fused with	pFL readsd	pFL reads (unfiltered)	pFL reads	pFL reads (unfiltered)	pFL reads	pFL reads (unfiltered)	pFL reads	pFL reads (unfiltered)
SRGAP2	SRGAP2	ancestral	partial	-			15446	40100	3	6	5804	13667	9642	26433
SRGAP2	SRGAP2B	duplicate	partial	5'	3,SF		8391	29005	1	5	2470	9319	5921	19686
SRGAP2	SRGAP2C	duplicate	partial	5'			12512	28686	3	6	4366	9279	8146	19407
SRGAP2	SRGAP2D	duplicate	partial	5'			3757	22558	0	5	1196	7446	2561	15112
FAM72	FAM72A	ancestral	complete	-	5		699	2410	1	1	191	664	508	1746
FAM72	FAM72B	duplicate	complete	whole			803	2483	0	1	238	688	565	1795
FAM72	FAM72C	duplicate	complete	whole			468	2342	0	0	111	647	357	1695
FAM72	FAM72D	duplicate	complete	whole			532	2490	0	1	159	693	373	1797
HYDIN	HYDIN	ancestral	partial	-			4275	16207	1	2	1702	6084	2573	10123
HYDIN	HYDIN2	duplicate	partial	mid	5,3,SF,GF	NBPF12	15450	18685	4	5	5753	6963	9697	11722
ROCK1	ROCK1	ancestral	partial	-			3201	3953	3	4	948	1120	2253	2833
ROCK1	ROCK1P1	duplicate	partial	3'	5,SF		859	2673	2	6	207	718	652	1955
ARHGAP11	ARHGAP11A	ancestral	partial	-	3,GF	SCG5	2668	2985	0	0	1127	1249	1541	1736
ARHGAP11	ARHGAP11B	duplicate	partial	5'	SF		445	1255	0	0	169	524	276	731
PTPN20	PTPN20	duplicate	partial	-			3134	3350	2	2	483	530	2651	2820
PTPN20	PTPN20CP	ancestral	partial	5'	3,SF,GF	BMS1P7	643	892	0	0	176	235	467	657
FRMPD2	FRMPD2	ancestral	partial	-	3		8053	20740	2	5	1300	2358	6753	18382
FRMPD2	FRMPD2B	duplicate	partial	3'	5,3		11855	19662	3	5	891	1962	10964	17700
GTF2I	GTF2I	ancestral	partial	-	3		45186	146862	4	26	13741	43584	31445	103278
GTF2I	GTF2IP1	duplicate	partial	3'			11651	180511	1	26	3454	55022	8197	125489
GTF2I	GTF2IP4	duplicate	partial	3'	3		74475	167293	4	25	25209	51210	49266	116083
GTF2IRD2	GTF2IRD2	ancestral	mixed	-	5,SF,GF	STAG3L2	1722	3920	0	0	617	1339	1105	2581
GTF2IRD2	GTF2IRD2B	duplicate	mixed	whole	5		1884	3780	0	0	638	1275	1246	2505
GTF2IRD2	GTF2IRD2P1	duplicate	mixed	3'			31	1611	0	0	11	520	20	1091
NCF	NCF1	ancestral	complete	-			282	623	0	1	21	45	261	578
NCF	NCF1C	duplicate	complete	whole			187	663	1	1	15	48	172	615
NCF	NCF1B	duplicate	complete	whole			201	677	0	1	13	47	188	630
GPR89	GPR89A	ancestral	complete	-			19475	35390	2	3	3834	7399	15641	27991
GPR89	GPR89B	duplicate	complete	whole			15738	35273	1	3	3543	7402	12195	27871
CD8B	CD8B	ancestral	complete	-			125	664	0	0	21	31	104	633
CD8B	CD8B2	duplicate	complete	whole	3		563	675	0	0	13	31	550	644
NOTCH2	NOTCH2	ancestral	partial	-			553	5884	0	3	223	1390	330	4494
NOTCH2	NOTCH2NL	duplicate	partial	5'	3,SF,GF	NBPF10	4259	7075	1	2	978	1783	3281	5292
NOTCH2	NOTCH2NLB	duplicate	partial	5'	3,SF,GF	NBPF14	845	6712	2	3	265	1684	580	5028
NOTCH2	NOTCH2NLC	duplicate	partial	5'	3,SF,GF	NBPF18	812	6338	0	3	158	1544	654	4794
NOTCH2	NOTCH2NLD	duplicate	partial	5'	3,SF,GF	NBPF26	464	5470	0	2	173	1366	291	4104
BOLA2	BOLA2B	ancestral	complete	whole			358	1897	0	0	49	424	309	1473
BOLA2	BOLA2	duplicate	complete	whole	SF,GF	SMG1P6	21201	23051	13	13	4645	5062	16556	17989
CORO1A	CORO1A	ancestral	partial	-			22264	22388	18	18	4611	4643	17653	17745
CORO1A	CORO1AP	duplicate	partial	3'			36	37	0	0	11	11	25	26
SLX1A	SLX1A	ancestral	complete	whole	3,GF	SULT1A3	539	2544	1	2	127	655	412	1889
SLX1A	SLX1B	duplicate	complete	whole	3,GF	SULT1A4	1716	3974	3	4	326	912	1390	3062
FCGR1A	FCGR1A	ancestral	complete	-			4857	6953	1	1	1622	2140	3235	4813
FCGR1A	FCGR1B	duplicate	complete	whole			1580	7066	1	2	388	2193	1192	4873
FCGR1A	FCGR1CP	duplicate	complete	whole			588	3140	0	2	188	1111	400	2029
ARHGEF5	ARHGEF34P	duplicate	partial	5'	SF,GF	OR2A7	69	128	0	0	55	104	14	24
ARHGEF5	ARHGEF35	duplicate	partial	5'	SF		76	98	0	0	52	64	24	34
ARHGEF5	ARHGEF5	ancestral	partial	-			195	273	0	0	94	165	101	108
CHRNA7	CHRFAM7A	duplicate	partial	3'	SF		1368	3654	0	1	680	1089	688	2565
CHRNA7	CHRNA7	ancestral	partial	-			2666	4287	2	2	787	1324	1879	2963
Notes: a. Gene names in accordance with the Human Genome Nomenclature Committee (HGNC), with the exception of NOTCH2NLB, NOTCH2NLC, NOTCH2NLD, and CORO1AP, which are not recorded; b. Derived from Dennis et. al. 2017 Table S9 unless otherwise specified; BOLA2, CORO1, SLX1A derived from Nuttle et al. 2016; c. 5: 5' extension of transcript or alternate transcription start site; 3: 3' extension of tr…

## Sheet: Table S7
Table S7. Fusions vs. truncations in 3' truncated genes
Gene Family	Gene	Type of truncation	Type of extension	Proportion of duplication-spanning reads	Designation
NOTCH2	NOTCH2NLC	Loss of PAS	3'	0.254902	intermediate
NOTCH2	NOTCH2NLD	Loss of PAS	3'	0.375887	intermediate
ARHGEF5	ARHGEF34P	Loss of PAS	3'	0.448276	intermediate
NOTCH2	NOTCH2NLB	Loss of PAS	3'	0.485769	intermediate
HYDIN	HYDIN2	Loss of PAS	3'	0.692182	intermediate
ARHGAP11A	ARHGAP11B	Loss of PAS	3'	0.858896	primarily fusion
PTPN20	PTPN20CP	Loss of PAS	3'	0.877483	primarily fusion
ARHGEF5	AHRGEF35	Loss of PAS	3'	0.933333	primarily fusion
SRGAP2	SRGAP2C	Loss of PAS	3'	0.0461986	primarily truncation
SRGAP2	SRGAP2D	Loss of PAS	3'	0.104685	primarily truncation
SRGAP2	SRGAP2B	Loss of PAS	3'	0.143546	primarily truncation
NOTCH2	NOTCH2NL	Loss of PAS	3'	0.16122	primarily truncation
ROCK1	ROCK1P1	Loss of TSS	5'	0.462382	intermediate
CHRNA7	CHRFAM7A	Loss of TSS	5'	0.547983	intermediate
GTF2I	GTF2IP4	Loss of TSS	5'	0.672133	intermediate
GTF2I	GTF2IP1	Loss of TSS	5'	0.675	intermediate
HYDIN	HYDIN2	Loss of TSS	5'	0.898246	primarily fusion
FRMPD2	FRMPD2B	Loss of TSS	5'	0.0417587	primarily truncation

## Sheet: Table S8
Table S8. Quantification of isoform abundance for Tigger-derived exon
		Sequencing technology		GTF2I				GTF2IRD2				GTF2IRD2B				GTF2IRD2*
Data source			RNA source		Tigger7	Annot.			Tigger7	Annot.			Tigger7	Annot.			Tigger7	Annot.
Counts of long-read transcripts	(a)	PB	human brain	0.15534	48	261		0.916667	154	14		0.922794	251	21		0.922197	403	34
	(b)	ONT	GM12878 cells	0.0272727	6	214			0	0			0	0		0	0	102
	(c)	PB	human iPS cells	0.8	4	1			0	0			0	0			0	0
		Sequencing technology		GTF2I				GTF2IRD2				GTF2IRD2B
Data source			RNA source		Tigger7	Annot.			Tigger7	Annot.			Tigger7	Annot.
Counts of splice-junction-spanning short reads	(c)	Ill.	human iPS cells		10 (1)	188 (14)			0 (1)	0 (12)			0 (1)	0 (12)
	(c)	Ill.	adult brain		1 (0)	58 (2)			0 (4)	1 (33)			1 (4)	0 (33)
	(c)	Ill.	fetal brain		0 (0)	58 (1)			0 (6)	0 (20)			0 (6)	1 (20)
	(d)	Ill.	brain - cortex		6 (0)	472 (10)			1 (97)	4 (199)			0 (97)	16 (199)
The relative abundance of isoforms of GTF2I, GTF2IRD2, and GTF2IRD2B containing the Tigger7-derived first exons vs the annotated first exon was approximated using both long- and short-read methods. Data for long-read counts are derived from (a) PacBio (PB) RNA-seq from human brain from this work, (b) Oxford Nanopore (ONT) direct RNA-seq from GM12878 cells (https://github.com/nanopore-wgs-consorti…
